# Supplementary material
Source: PubMed Central journal article supplement (PMC6373496)
Supplement: supp_esu019_Supplemental_Table_S1__v4.pdf [file supp_esu019_Supplemental_Table_S1__v4.pdf]

Table S1. Output from the edgeR analysis. Positive fold-change values indicate genes that are expressed higher in the maize *pbf1* NIL than in the teosinte *pbf1* NIL; negative values genes that are higher in the teosinte NIL. Log<sub>2</sub> (counts per million) is based on ~80 million total counts. Only genes with p-values less than 0.05 are shown. False Discovery Rate (FDR) is reported for each locus. Interpro and Gene Ontology terms are listed in the final two columns.

| Gene          | log <sub>2</sub> (fold change) | log <sub>2</sub> (count per million) | P-value     | FDR         | Interpro                                                | GO                                                                                                                                                                                                                                                                                                                                                                                                                 |
|---------------|--------------------------------|--------------------------------------|-------------|-------------|---------------------------------------------------------|--------------------------------------------------------------------------------------------------------------------------------------------------------------------------------------------------------------------------------------------------------------------------------------------------------------------------------------------------------------------------------------------------------------------|
| GRMZM2G134402 | 8.199501717                    | 0.272589712                          | 6.56E-06    | 0.160767193 | ARP2/3_p21-Arc                                          | cellular_component intracellular cell cytoskeleton Arp2/3 protein complex cytoskeleton organization biological_process regulation of actin filament polymerization Arp2/3 complex-mediated actin nucleation organelle protein complex                                                                                                                                                                              |
| GRMZM2G127850 | -8.15556393                    | 0.364152446                          | 6.16E-05    | 0.754572971 | WD40_repeat WD40_repeat_dom G-protein_beta_WD40_rep     | molecular_function protein binding cellular_component intracellular cell nucleus nucleolus organelle                                                                                                                                                                                                                                                                                                               |
| GRMZM2G311756 | -1.226080238                   | 4.662804493                          | 0.000108161 | 0.883640808 | Glycosyl_hydrolases_36 Glycoside_hydrolase_SF           | molecular_function catalytic activity biological_process metabolic process                                                                                                                                                                                                                                                                                                                                         |
| GRMZM2G370175 | -7.264247534                   | -0.107767466                         | 0.000144845 | 0.887498574 | Not Annotated                                           | Not Annotated                                                                                                                                                                                                                                                                                                                                                                                                      |
| GRMZM2G094703 | -4.881292814                   | 0.04111286                           | 0.000212954 | 0.937193604 | Not Annotated                                           | Not Annotated                                                                                                                                                                                                                                                                                                                                                                                                      |
| GRMZM2G038604 | -2.91655158                    | 1.679054152                          | 0.000229433 | 0.937193604 | Not Annotated                                           | Not Annotated                                                                                                                                                                                                                                                                                                                                                                                                      |
| GRMZM5G821869 | -1.812841739                   | 2.913053093                          | 0.000377931 | 1           | Not Annotated                                           | Not Annotated                                                                                                                                                                                                                                                                                                                                                                                                      |
| GRMZM2G529658 | -1.982236022                   | 2.775380198                          | 0.000504487 | 1           | Not Annotated                                           | Not Annotated                                                                                                                                                                                                                                                                                                                                                                                                      |
| GRMZM2G153675 | -2.162762207                   | 0.74288617                           | 0.000507787 | 1           | PP2C-like_dom                                           | molecular_function catalytic activity biological_process metabolic process                                                                                                                                                                                                                                                                                                                                         |
| GRMZM2G127361 | -3.735805934                   | 1.204026244                          | 0.000567348 | 1           | Quin_OxRdtase/zeta-crystal_CS GroES-like ADH_GroES-like | nucleotide binding molecular_function cellular_component extracellular region intracellular cell cytoplasm response to stress biological_process zinc ion binding response to cold chloroplast plastid chloroplast stroma thylakoid chloroplast envelope stromule oxidoreductase activity enone reductase activity 2-alkenal reductase (NADP+) activity ion binding organelle apoplast oxidation-reduction process |
| GRMZM2G026654 | -1.522393404                   | 1.509301167                          | 0.000571693 | 1           | Not Annotated                                           | plasma membrane                                                                                                                                                                                                                                                                                                                                                                                                    |
| GRMZM2G061732 | -1.700547596                   | 1.885998416                          | 0.000585992 | 1           | NadA                                                    | molecular_function biological_process quinolinate synthetase A activity biosynthetic process NAD biosynthetic process cellular nitrogen compound metabolic process small molecule metabolic process cofactor metabolic process                                                                                                                                                                                     |
| GRMZM2G331833 | -1.05854083                    | 2.714478319                          | 0.000654094 | 1           | AAA+_ATPase ATPase_AAA-2 Clp_ATPase_C                   | nucleotide binding molecular_function ATP binding protein folding biological_process nucleoside-triphosphatase activity unfolded protein binding                                                                                                                                                                                                                                                                   |
| GRMZM2G180697 | -1.433080229                   | 2.04536531                           | 0.000720598 | 1           | Not Annotated                                           | Not Annotated                                                                                                                                                                                                                                                                                                                                                                                                      |
| GRMZM2G006585 | -0.984840779                   | 10.11057173                          | 0.000728688 | 1           | DUF597                                                  | Not Annotated                                                                                                                                                                                                                                                                                                                                                                                                      |
| GRMZM2G008341 | -0.954259519                   | 5.795302282                          | 0.000780736 | 1           | Zein                                                    | molecular_function nutrient reservoir activity                                                                                                                                                                                                                                                                                                                                                                     |
| GRMZM2G036048 | -1.625134216                   | 1.362472283                          | 0.000873317 | 1           | Not Annotated                                           | Not Annotated                                                                                                                                                                                                                                                                                                                                                                                                      |
| GRMZM2G169734 | 7.69342547                     | -0.531162002                         | 0.000949443 | 1           | Not Annotated                                           | Not Annotated                                                                                                                                                                                                                                                                                                                                                                                                      |
| GRMZM2G075489 | -2.596881555                   | 0.119485342                          | 0.001050364 | 1           | Not Annotated                                           | Not Annotated                                                                                                                                                                                                                                                                                                                                                                                                      |
| GRMZM2G021921 | -1.036055485                   | 3.877288165                          | 0.001072398 | 1           | Not Annotated                                           | Not Annotated                                                                                                                                                                                                                                                                                                                                                                                                      |
| GRMZM5G864735 | -1.315804645                   | 6.21466028                           | 0.001388093 | 1           | Histone_H3 Histone_core_D Histone-fold                  | nucleosome molecular_function DNA binding cellular_component intracellular cell nucleus chromosome DNA metabolic process nucleosome assembly biological_process cellular component assembly cellular nitrogen compound metabolic process organelle protein heterodimerization activity chromosome organization macromolecular complex assembly                                                                     |

| Gene          | log2 (fold change) | log2 (count per million) | P-value     | FDR | Interpro                                                                                        | GO                                                                                                                                                                                                                                                                                                                                                                 |
|---------------|--------------------|--------------------------|-------------|-----|-------------------------------------------------------------------------------------------------|--------------------------------------------------------------------------------------------------------------------------------------------------------------------------------------------------------------------------------------------------------------------------------------------------------------------------------------------------------------------|
| GRMZM5G877040 | 6.731785775        | -1.191080492             | 0.001543696 | 1   | Ribosomal_S12_bac Ribosomal_S12/S23 NA-bd_OB-fold                                               | molecular_function structural constituent of ribosome structural molecule activity cellular_component intracellular cell cytoplasm mitochondrion ribosome translation biological_process biosynthetic process small ribosomal subunit ribonucleoprotein complex organelle                                                                                          |
| GRMZM2G353091 | 1.865247836        | 2.528356065              | 0.001559068 | 1   | Znf_RING                                                                                        | molecular_function protein binding zinc ion binding ion binding                                                                                                                                                                                                                                                                                                    |
| GRMZM2G055155 | 7.928440393        | -0.459762611             | 0.001661546 | 1   | Not Annotated                                                                                   | Not Annotated                                                                                                                                                                                                                                                                                                                                                      |
| GRMZM2G075044 | -1.22255831        | 2.664977655              | 0.001907838 | 1   | Not Annotated                                                                                   | Not Annotated                                                                                                                                                                                                                                                                                                                                                      |
| GRMZM2G305060 | -0.637754318       | 4.918014516              | 0.002052422 | 1   | DNA/RNA_helicase_DEAH_CS Helicase_C Helicase-<br>assoc_dom DUF1605 Helicase_ATP-bd              | molecular_function nucleic acid binding helicase activity ATP binding ATP-dependent helicase activity ATPase activity                                                                                                                                                                                                                                              |
| GRMZM2G413337 | -7.329418719       | 0.248852193              | 0.00212943  | 1   | Not Annotated                                                                                   | Not Annotated                                                                                                                                                                                                                                                                                                                                                      |
| GRMZM2G164426 | -1.091349858       | 4.707001473              | 0.002228122 | 1   | Znf_RING                                                                                        | molecular_function protein binding biological_process zinc ion binding response to chitin ion binding metal ion binding                                                                                                                                                                                                                                            |
| GRMZM2G042198 | 6.792620629        | -1.165243374             | 0.002264269 | 1   | Znf_B-box CCT_domain                                                                            | molecular_function protein binding cellular_component intracellular cell nucleus plasma membrane circadian rhythm biological_process zinc ion binding ion binding organelle negative regulation of long-day photoperiodism, flowering                                                                                                                              |
| GRMZM2G142927 | -1.737253345       | 0.785409223              | 0.002396933 | 1   | Ndr                                                                                             | Not Annotated                                                                                                                                                                                                                                                                                                                                                      |
| GRMZM2G415228 | -1.990172802       | 0.93949899               | 0.002435006 | 1   | Not Annotated                                                                                   | Not Annotated                                                                                                                                                                                                                                                                                                                                                      |
| GRMZM2G466993 | 1.740654467        | 0.019111133              | 0.002508421 | 1   | Not Annotated                                                                                   | Not Annotated                                                                                                                                                                                                                                                                                                                                                      |
| GRMZM5G897776 | -0.924279384       | 3.228137708              | 0.002536282 | 1   | Not Annotated                                                                                   | Not Annotated                                                                                                                                                                                                                                                                                                                                                      |
| GRMZM2G137868 | 1.122866211        | 2.746596762              | 0.00263622  | 1   | Aminotrans_V/Cys_dSase PyrdxLP-dep_Trfase Aminotrans_V_PyrdxLP_BS SP_NH2Trfase/AEP_transaminase | molecular_function catalytic activity biological_process metabolic process transaminase activity transferase activity pyridoxal phosphate binding                                                                                                                                                                                                                  |
| GRMZM2G081464 | 0.692990767        | 6.006538329              | 0.002675686 | 1   | Bifunc_inhib/LTP/seed_store                                                                     | molecular_function cellular_component transport lipid transport biological_process lipid binding                                                                                                                                                                                                                                                                   |
| GRMZM2G357688 | -2.393236284       | 1.744415687              | 0.002701765 | 1   | Znf_C2H2 Znf_C2H2-like                                                                          | molecular_function cellular_component intracellular cell zinc ion binding ion binding                                                                                                                                                                                                                                                                              |
| GRMZM2G132223 | 3.619125192        | -1.937544079             | 0.002758414 | 1   | AP2/ERF_dom DNA-bd_dom                                                                          | nucleic acid binding transcription factor activity molecular_function DNA binding sequence-specific DNA binding transcription factor activity cellular_component intracellular cell nucleus transcription, DNA-templated regulation of transcription, DNA-templated biological_process biosynthetic process cellular nitrogen compound metabolic process organelle |
| GRMZM2G100286 | -1.227717733       | 1.369789949              | 0.002778861 | 1   | Pumilio_RNA-bd_rpt ARM-type_fold                                                                | molecular_function RNA binding binding                                                                                                                                                                                                                                                                                                                             |
| GRMZM5G878615 | -0.840469455       | 3.132739683              | 0.002908867 | 1   | Actin_CS Actin-related WD40_repeat_dom Znf_RING                                                 | molecular_function ATP binding                                                                                                                                                                                                                                                                                                                                     |
| GRMZM2G331154 | -0.753121929       | 2.42283211               | 0.002910375 | 1   | f_RING                                                                                          | molecular_function protein binding zinc ion binding ion binding                                                                                                                                                                                                                                                                                                    |
| GRMZM2G485304 | -8.137480626       | -0.02003742              | 0.002935973 | 1   | Not Annotated                                                                                   | Not Annotated                                                                                                                                                                                                                                                                                                                                                      |
| GRMZM2G180691 | -0.622900202       | 4.537023518              | 0.002936653 | 1   | PEstase_dom Ser/Thrsp_prot-phosphatase                                                          | molecular_function phosphoprotein phosphatase activity cellular_component intracellular cell nucleus cytoplasm hydrolase activity phosphatase activity organelle                                                                                                                                                                                                   |
| GRMZM2G032145 | 2.23210574         | 5.52023696               | 0.003037864 | 1   | BURP_dom                                                                                        | Not Annotated                                                                                                                                                                                                                                                                                                                                                      |

| Gene             | log2 (fold change) | log2 (count per million) | P-value     | FDR | Interpro                                                                       | GO                                                                                                                                                                                                                                                                                                                                                                                |
|------------------|--------------------|--------------------------|-------------|-----|--------------------------------------------------------------------------------|-----------------------------------------------------------------------------------------------------------------------------------------------------------------------------------------------------------------------------------------------------------------------------------------------------------------------------------------------------------------------------------|
| GRMZM2G032293    | -2.002923843       | 0.570003303              | 0.003045982 |     | 1 Not Annotated                                                                | Not Annotated                                                                                                                                                                                                                                                                                                                                                                     |
| GRMZM2G012734    | 6.532186565        | -1.574841175             | 0.003054616 |     | 1 PMR5_N_dom PC-Esterase                                                       | Not Annotated                                                                                                                                                                                                                                                                                                                                                                     |
| GRMZM5G880306    | -1.837581751       | 0.430900002              | 0.003089177 |     | 1 OTU Peptidase_C65_o tubain                                                   | Not Annotated                                                                                                                                                                                                                                                                                                                                                                     |
| GRMZM5G869993    | -0.946978091       | 5.102068078              | 0.003113959 |     | 1 Not Annotated                                                                | Not Annotated                                                                                                                                                                                                                                                                                                                                                                     |
| GRMZM2G475743    | 6.850993686        | -1.293502364             | 0.003149886 |     | 1 Pentatricopeptide_rep eat                                                    | Not Annotated                                                                                                                                                                                                                                                                                                                                                                     |
| GRMZM2G169782    | -1.689944636       | 0.697370009              | 0.003157533 |     | 1 BTB/POZ-like BTB/POZ_fold BTB_POZ NPH3_dom                                   | molecular_function protein binding cellular_component membrane                                                                                                                                                                                                                                                                                                                    |
| GRMZM2G012355    | -2.564530681       | 0.668786001              | 0.003280473 |     | 1 Put_SAM_MeTrfase                                                             | molecular_function methyltransferase activity                                                                                                                                                                                                                                                                                                                                     |
| GRMZM2G066710    | -0.963989348       | 3.365123035              | 0.003324191 |     | 1 Ser/Thr_dual-sp_kinase_dom Prot_kinase_dom Ser/Thr_kinase_AS Kinase-like_dom | molecular_function protein kinase activity protein serine/threonine kinase activity ATP binding cellular protein modification process protein phosphorylation biological_process kinase activity transferase activity, transferring phosphorus-containing groups                                                                                                                  |
| AF466202.2_FG007 | 5.682387865        | -1.736009148             | 0.003327189 |     | 1 Aldo/keto_reductase_ubgr NADP_OxRdtase_dom                                   | molecular_function biological_process oxidoreductase activity oxidation-reduction process                                                                                                                                                                                                                                                                                         |
| GRMZM2G158437    | -1.769873937       | 0.712413903              | 0.003344138 |     | 1 NADP_OxRdtase_dom                                                            | Not Annotated                                                                                                                                                                                                                                                                                                                                                                     |
| GRMZM5G803419    | -1.829349153       | 0.696585892              | 0.003408381 |     | 1 Not Annotated                                                                | Not Annotated                                                                                                                                                                                                                                                                                                                                                                     |
| GRMZM2G137596    | -2.782723914       | -0.105954243             | 0.003433969 |     | 1 Not Annotated                                                                | Not Annotated                                                                                                                                                                                                                                                                                                                                                                     |
| GRMZM2G180254    | -0.554883852       | 4.237392434              | 0.003462262 |     | 1 NB-ARC Disease_R                                                             | molecular_function response to stress defense response biological_process ADP binding                                                                                                                                                                                                                                                                                             |
| GRMZM2G118586    | -8.062791785       | 0.425255432              | 0.003494101 |     | 1 ARPC4                                                                        | cell morphogenesis cellular_component intracellular cell cytoskeleton Arp2/3 protein complex protein complex assembly cytoskeleton organization biological_process cellular component assembly actin filament polymerization Arp2/3 complex-mediated actin nucleation organelle protein complex actin nucleation anatomical structure development macromolecular complex assembly |
| GRMZM2G162119    | -4.361565403       | -0.514787198             | 0.003558711 |     | 1 Znf_CCCH RRM_dom U2_small                                                    | molecular_function nucleic acid binding zinc ion binding ion binding                                                                                                                                                                                                                                                                                                              |
| GRMZM2G013563    | 5.547690956        | -1.933974652             | 0.003565673 |     | 1 WD40_repeat WD40_repeat_dom WD40_repeat_CS G-protein_beta_WD-40_rep          | molecular_function protein binding nucleus vegetative to reproductive phase transition of meristem histone binding Set1C/COMPASS complex                                                                                                                                                                                                                                          |
| GRMZM2G122199    | -0.725210166       | 3.999792984              | 0.003580478 |     | 1 Not Annotated                                                                | Not Annotated                                                                                                                                                                                                                                                                                                                                                                     |
| GRMZM2G588223    | -0.719080679       | 3.529829452              | 0.003608318 |     | 1 Not Annotated                                                                | molecular_function RNA binding double-stranded RNA binding                                                                                                                                                                                                                                                                                                                        |
| GRMZM2G403162    | -1.130545551       | 3.776321973              | 0.003766037 |     | 1 Not Annotated                                                                | Not Annotated                                                                                                                                                                                                                                                                                                                                                                     |
| GRMZM2G039322    | -4.008940395       | -0.85201388              | 0.003769297 |     | 1 mRNA_splic_Cwf21                                                             | Not Annotated                                                                                                                                                                                                                                                                                                                                                                     |
| GRMZM5G849275    | -6.650356453       | -1.059029944             | 0.004198311 |     | 1 Not Annotated                                                                | Not Annotated                                                                                                                                                                                                                                                                                                                                                                     |
| GRMZM2G150928    | -1.045902291       | 2.894349746              | 0.004321632 |     | 1 Not Annotated                                                                | Not Annotated                                                                                                                                                                                                                                                                                                                                                                     |
| GRMZM2G318956    | -0.753635095       | 3.190791089              | 0.004402707 |     | 1 TUBGCP                                                                       | microtubule cytoskeleton organization spindle pole cellular_component intracellular cell cytoplasm microtubule organizing center cytoskeleton cytoskeleton organization biological_process organelle                                                                                                                                                                              |

| Gene             | log2 (fold change) | log2 (count per million) | P-value     | FDR | Interpro                                                                                                                  | GO                                                                                                                                                                                                                                                                                                                                                                                                                                                                                                                                                                          |
|------------------|--------------------|--------------------------|-------------|-----|---------------------------------------------------------------------------------------------------------------------------|-----------------------------------------------------------------------------------------------------------------------------------------------------------------------------------------------------------------------------------------------------------------------------------------------------------------------------------------------------------------------------------------------------------------------------------------------------------------------------------------------------------------------------------------------------------------------------|
|                  |                    |                          |             |     | DNA_helicase_ATP-dep_RecQ DNA/RNA_helicase_DEAH_CS Helicase_C DNA/RNA_helicase_DEAD/DEAH_N Helicase_ATP-bd HRDC_dom HRDC- | double-strand break repair via homologous recombination molecular_function nucleic acid binding helicase activity ATP binding DNA metabolic process DNA recombination cellular response to DNA damage stimulus ATP-dependent helicase activity biological_process plasmodesma ATPase activity cellular nitrogen compound metabolic process 3'-5' DNA helicase activity chromosome organization cellular response to cold cellular response to abscisic acid stimulus nucleotide binding catalytic activity cellular_component intracellular cell cellular metabolic process |
| GRMZM2G319573    | -0.648338097       | 3.49817116               | 0.004430581 | 1   | like                                                                                                                      |                                                                                                                                                                                                                                                                                                                                                                                                                                                                                                                                                                             |
| GRMZM2G375249    | -2.256002538       | -0.283324828             | 0.004450783 | 1   | Not Annotated                                                                                                             | Not Annotated                                                                                                                                                                                                                                                                                                                                                                                                                                                                                                                                                               |
| GRMZM2G030578    | -0.507287993       | 6.334544042              | 0.004479741 | 1   | Exportin-1/Importin-b-like ARM-type_fold                                                                                  | molecular_function binding response to molecule of fungal origin cellular_component intracellular cell cytoplasm endoplasmic reticulum Golgi apparatus plasma membrane biological_process membrane integral component of membrane organelle                                                                                                                                                                                                                                                                                                                                 |
| GRMZM2G151521    | -0.62565326        | 3.403740165              | 0.004528161 | 1   | TLC-dom                                                                                                                   |                                                                                                                                                                                                                                                                                                                                                                                                                                                                                                                                                                             |
| GRMZM2G346865    | -1.428298102       | 1.343346812              | 0.004579019 | 1   | Nucleotide_exch_fac_Fes1 ARM-type_fold                                                                                    | molecular_function binding                                                                                                                                                                                                                                                                                                                                                                                                                                                                                                                                                  |
| GRMZM5G884270    | -1.007855253       | 2.784848479              | 0.004601078 | 1   | GPI_EtnP_transferase_1_C                                                                                                  | molecular_function cellular_component intracellular cell cytoplasm endoplasmic reticulum endoplasmic reticulum membrane cellular protein modification process GPI anchor biosynthetic process lipid metabolic process biological_process biosynthetic process transferase activity organelle                                                                                                                                                                                                                                                                                |
| GRMZM2G075563    | -0.948763576       | 6.421154959              | 0.00469802  | 1   | TPR_1                                                                                                                     | molecular_function protein binding regulation of sulfur utilization response to stress biological_process cellular response to sulfur starvation                                                                                                                                                                                                                                                                                                                                                                                                                            |
| GRMZM2G053120    | -0.698665557       | 8.107038572              | 0.00477399  | 1   | Zein                                                                                                                      | molecular_function nutrient reservoir activity                                                                                                                                                                                                                                                                                                                                                                                                                                                                                                                              |
| GRMZM2G457347    | -1.162641125       | 2.131143926              | 0.004880603 | 1   | Cactin_dom                                                                                                                | Not Annotated                                                                                                                                                                                                                                                                                                                                                                                                                                                                                                                                                               |
| GRMZM2G342226    | -2.717466493       | -0.847470316             | 0.004897139 | 1   | UDPGP_trans RNA_helicase_DEAD-box_CS KOW Trimer_LpxA-like DNA/RNA_helicase_DEAD/DEAH_N Helicase_ATP-bd                    | molecular_function nucleic acid binding helicase activity ATP binding ATP-dependent helicase activity biological_process metabolic process transferase activity nucleotidyltransferase activity ATPase activity                                                                                                                                                                                                                                                                                                                                                             |
| GRMZM2G513713    | -2.096785608       | -0.466076276             | 0.004976986 | 1   | Not Annotated                                                                                                             | Not Annotated                                                                                                                                                                                                                                                                                                                                                                                                                                                                                                                                                               |
| GRMZM2G119230    | -1.84768278        | 1.943457872              | 0.004981909 | 1   | Not Annotated                                                                                                             | Not Annotated                                                                                                                                                                                                                                                                                                                                                                                                                                                                                                                                                               |
| GRMZM2G084369    | -1.097653261       | 5.32985546               | 0.005014999 | 1   | Glutathione-S-Trfase_C-like                                                                                               | protein glutathionylation                                                                                                                                                                                                                                                                                                                                                                                                                                                                                                                                                   |
| GRMZM5G815851    | -4.405578184       | -0.81112177              | 0.005073474 | 1   | Not Annotated                                                                                                             | Not Annotated                                                                                                                                                                                                                                                                                                                                                                                                                                                                                                                                                               |
| GRMZM5G871297    | -0.838329113       | 3.879749285              | 0.00509876  | 1   | aa-tRNA-synth_la tRNA-synth_1a_anticodon-bd tRNA-bd_arm V/L/I-tRNA-synth_anticodon-bd Val-tRNA_synth_tRNA-bd              | nucleotide binding molecular_function aminoacyl-tRNA ligase activity valine-tRNA ligase activity ATP binding cellular_component intracellular cell cytoplasm tRNA metabolic process translation tRNA aminoacylation for protein translation valyl-tRNA aminoacylation cellular amino acid metabolic process biological_process biosynthetic process ligase activity cellular nitrogen compound metabolic process small molecule metabolic process                                                                                                                           |
| GRMZM5G844123    | -1.584493199       | 0.811362036              | 0.005127978 | 1   | Not Annotated                                                                                                             | Not Annotated                                                                                                                                                                                                                                                                                                                                                                                                                                                                                                                                                               |
| AC155352.2_FG010 | 1.34154285         | 7.240140275              | 0.005174516 | 1   | Bifunc_inhib/LTP/seed_store                                                                                               | response to auxin lateral root morphogenesis                                                                                                                                                                                                                                                                                                                                                                                                                                                                                                                                |

| Gene          | log2 (fold change) | log2 (count per million) | P-value     | FDR | Interpro                                                                                                                                        | GO                                                                                                                                                                                                                                                                                                                                                                                                                                                                                                                                                                                           |
|---------------|--------------------|--------------------------|-------------|-----|-------------------------------------------------------------------------------------------------------------------------------------------------|----------------------------------------------------------------------------------------------------------------------------------------------------------------------------------------------------------------------------------------------------------------------------------------------------------------------------------------------------------------------------------------------------------------------------------------------------------------------------------------------------------------------------------------------------------------------------------------------|
| GRMZM5G856738 | -1.496921073       | 1.410118126              | 0.005193382 | 1   | Ser/Thr_dual-sp_kinase_dom EF_hand_dom Prot_kinase_dom Ser/Thr_kinase_AS Kinase-like_dom EF-hand_dom_pair Protein_kinase_ATP_BS EF_Hand_1_Ca_BS | nucleotide binding molecular_function protein kinase activity protein serine/threonine kinase activity calcium ion binding ATP binding cellular_component intracellular cell cytoplasm vacuole plasma membrane cellular protein modification process protein phosphorylation response to stress signal transduction biological_process response to salt stress abscisic acid-activated signaling pathway regulation of stomatal movement regulation of anion channel activity membrane kinase activity transferase activity, transferring phosphorus-containing groups ion binding organelle |
| GRMZM2G084513 | -0.86846102        | 2.918328832              | 0.005268435 | 1   | CENP-O                                                                                                                                          | chromosome, centromeric region cellular_component intracellular cell nucleus chromosome chromosome segregation biological_process organelle cell division                                                                                                                                                                                                                                                                                                                                                                                                                                    |
| GRMZM2G134439 | -0.976829632       | 1.962952398              | 0.005310645 | 1   | SANT/Myb RMMBL Myb-like_dom                                                                                                                     | molecular_function DNA binding chromatin binding RNA binding hydrolase activity, acting on ester bonds ion binding metal ion binding                                                                                                                                                                                                                                                                                                                                                                                                                                                         |
| GRMZM2G033348 | -0.998239628       | 3.327205775              | 0.005341188 | 1   | VPSAP_dom                                                                                                                                       | Not Annotated                                                                                                                                                                                                                                                                                                                                                                                                                                                                                                                                                                                |
| GRMZM2G093278 | -0.981892733       | 2.441865524              | 0.005505016 | 1   | Glycosyl_transferase_4                                                                                                                          | molecular_function cellular_component phospho-N-acetylmuramoyl-pentapeptide-transferase activity membrane integral component of membrane                                                                                                                                                                                                                                                                                                                                                                                                                                                     |
| GRMZM2G050939 | -0.85679303        | 3.239276584              | 0.005582203 | 1   | Znf_C2H2 Znf_C2H2-like                                                                                                                          | nucleic acid binding transcription factor activity molecular_function nucleic acid binding DNA binding sequence-specific DNA binding transcription factor activity RNA binding cellular_component intracellular cell nucleus nucleolus regulation of transcription, DNA-templated 5S rRNA binding biological_process zinc ion binding rRNA binding ion binding organelle 5S rDNA binding                                                                                                                                                                                                     |
| GRMZM2G336285 | -0.815408037       | 3.78215941               | 0.005608752 | 1   | Not Annotated                                                                                                                                   | Not Annotated                                                                                                                                                                                                                                                                                                                                                                                                                                                                                                                                                                                |
| GRMZM2G014329 | 6.850993686        | -0.94736682              | 0.005619042 | 1   | Not Annotated                                                                                                                                   | Not Annotated                                                                                                                                                                                                                                                                                                                                                                                                                                                                                                                                                                                |
| GRMZM2G044368 | 0.504758658        | 0.862620504              | 0.00567732  | 1   | Small_GTP-bd_dom Small_GTPase_Rab_type Small_GTPase                                                                                             | nucleotide binding molecular_function GTP binding cellular_component intracellular cell nucleus plasma membrane transport response to stress response to oxidative stress signal transduction small GTPase mediated signal transduction biological_process response to salt stress protein transport organelle                                                                                                                                                                                                                                                                               |
| GRMZM2G496821 | -1.261218113       | 3.926853587              | 0.005739712 | 1   | Not Annotated                                                                                                                                   | Not Annotated                                                                                                                                                                                                                                                                                                                                                                                                                                                                                                                                                                                |
| GRMZM2G315730 | -1.256735989       | 2.565929005              | 0.005805577 | 1   | Not Annotated                                                                                                                                   | Not Annotated                                                                                                                                                                                                                                                                                                                                                                                                                                                                                                                                                                                |
| GRMZM2G021369 | -1.830545648       | 2.439008237              | 0.00585319  | 1   | AP2/ERF_dom DNA-bd_dom                                                                                                                          | nucleic acid binding transcription factor activity molecular_function DNA binding sequence-specific DNA binding transcription factor activity regulation of transcription, DNA-templated biological_process cellular_component intracellular cell nucleus transcription, DNA-templated biosynthetic process cellular nitrogen compound metabolic process organelle                                                                                                                                                                                                                           |
| GRMZM2G149132 | -1.375893978       | 0.770321486              | 0.005867202 | 1   | PP2C-like_dom PP2C_Mn2_Asp60_BS                                                                                                                 | molecular_function catalytic activity phosphoprotein phosphatase activity protein serine/threonine phosphatase activity cellular protein modification process protein dephosphorylation biological_process hydrolase activity phosphatase activity ion binding metal ion binding                                                                                                                                                                                                                                                                                                             |
| GRMZM2G093276 | -0.701663969       | 3.889412214              | 0.005869644 | 1   | Zn/Fe_permease_fun/pln ZIP                                                                                                                      | molecular_function zinc ion transmembrane transporter activity cellular_component intracellular cell cytoplasm transport biological_process membrane integral component of membrane cytoplasmic membrane-bounded vesicle transmembrane transporter activity metal ion transport organelle metal ion transmembrane transporter activity transmembrane transport zinc ion transmembrane transport                                                                                                                                                                                              |

| Gene          | log2 (fold change) | log2 (count per million) | P-value     | FDR | Interpro                                                                                                   | GO                                                                                                                                                                                                                                                                                                                                                                                                                                                                                                                                                                          |
|---------------|--------------------|--------------------------|-------------|-----|------------------------------------------------------------------------------------------------------------|-----------------------------------------------------------------------------------------------------------------------------------------------------------------------------------------------------------------------------------------------------------------------------------------------------------------------------------------------------------------------------------------------------------------------------------------------------------------------------------------------------------------------------------------------------------------------------|
| GRMZM2G151807 | -0.996284624       | 5.09446965               | 0.00591894  |     | 1 Not Annotated                                                                                            | Not Annotated                                                                                                                                                                                                                                                                                                                                                                                                                                                                                                                                                               |
|               |                    |                          |             |     | SBNO_Helicase_C_do                                                                                         |                                                                                                                                                                                                                                                                                                                                                                                                                                                                                                                                                                             |
| GRMZM2G155949 | -0.645499101       | 4.096396416              | 0.005981788 |     | 1 m                                                                                                        | regulation of transcription, DNA-templated biological_process                                                                                                                                                                                                                                                                                                                                                                                                                                                                                                               |
| GRMZM5G842970 | -1.57653504        | 1.801968713              | 0.006072414 |     | 1 Not Annotated                                                                                            | Not Annotated                                                                                                                                                                                                                                                                                                                                                                                                                                                                                                                                                               |
| GRMZM2G548261 | -4.170716704       | -0.892093244             | 0.006131152 |     | 1 Not Annotated                                                                                            | Not Annotated                                                                                                                                                                                                                                                                                                                                                                                                                                                                                                                                                               |
| GRMZM2G134878 | -1.838942014       | -0.313580155             | 0.006137575 |     | 1 Not Annotated                                                                                            | Not Annotated                                                                                                                                                                                                                                                                                                                                                                                                                                                                                                                                                               |
|               |                    |                          |             |     | Small_GTP-bd_dom Transl_elong_EFTu/EF1A_2 EF_GTP_bd_dom EFG_V EF-4 Transl_B-barrel EFG_III-V LepA_GTP-bd_C | nucleotide binding molecular_function RNA binding translation elongation factor activity GTPase activity GTP binding cellular_component intracellular cell cytoplasm mitochondrion mitochondrial matrix GTP catabolic process translation translational elongation translation factor activity, nucleic acid binding biological_process catabolic process biosynthetic process cellular nitrogen compound metabolic process nucleobase-containing compound catabolic process ribosome binding organelle small molecule metabolic process positive regulation of translation |
| GRMZM2G028928 | -0.741070659       | 3.252538814              | 0.006181061 |     | 1 V LepA_GTP-bd_C                                                                                          |                                                                                                                                                                                                                                                                                                                                                                                                                                                                                                                                                                             |
|               |                    |                          |             |     | KH_dom_type_1 KH_d                                                                                         |                                                                                                                                                                                                                                                                                                                                                                                                                                                                                                                                                                             |
| GRMZM2G075039 | -1.016422836       | 1.617008769              | 0.0062205   |     | 1 om                                                                                                       | molecular_function RNA binding                                                                                                                                                                                                                                                                                                                                                                                                                                                                                                                                              |
| GRMZM2G045816 | -1.962539481       | -0.084439632             | 0.006248536 |     | 1 Not Annotated                                                                                            | Not Annotated                                                                                                                                                                                                                                                                                                                                                                                                                                                                                                                                                               |
|               |                    |                          |             |     | Ser-Thr/Tyr_kinase_cat_dom Prot_kinase_dom Ser/Thr_kinase_AS Kinase-like_dom ACT_dom                       | molecular_function protein kinase activity protein serine/threonine kinase activity ATP binding cellular_component intracellular cell cytoplasm cytosol cellular protein modification process protein phosphorylation biological_process kinase activity transferase activity, transferring phosphorus-containing groups metabolic process chloroplast organization amino acid binding                                                                                                                                                                                      |
| GRMZM2G160922 | -0.730461985       | 3.709452615              | 0.006308183 |     | 1 Not Annotated                                                                                            | Not Annotated                                                                                                                                                                                                                                                                                                                                                                                                                                                                                                                                                               |
| GRMZM2G561067 | -1.44174242        | 0.554856639              | 0.006425871 |     | 1 DnaJ_domain DnaJ_domain_CS                                                                               | Not Annotated                                                                                                                                                                                                                                                                                                                                                                                                                                                                                                                                                               |
| GRMZM2G003635 | -0.623794609       | 3.606728437              | 0.006457238 |     | 1 Amb_allergen_dom PbH1 Pectin_lyase_fold/virulence AmbAllergen                                            | molecular_function lyase activity                                                                                                                                                                                                                                                                                                                                                                                                                                                                                                                                           |
|               |                    |                          |             |     | Znf_Sec23_Sec24 Sec23/24_trunk_dom Sec23/24_helical_dom Sec23_24_beta_S                                    | molecular_function cellular_component intracellular cell cytoplasm transport intracellular protein transport ER to Golgi vesicle-mediated transport biological_process zinc ion binding protein transport cytoplasmic membrane-bounded vesicle vesicle-mediated transport COPII vesicle coat ion binding organelle protein complex                                                                                                                                                                                                                                          |
| GRMZM2G095810 | -0.657318823       | 2.387520932              | 0.006534695 |     | 1 Not Annotated                                                                                            | Not Annotated                                                                                                                                                                                                                                                                                                                                                                                                                                                                                                                                                               |
| GRMZM2G373527 | 6.731785775        | -1.254670505             | 0.006556719 |     | 1 UPF0136_TM                                                                                               | molecular_function cellular_component biological_process membrane kinase activity phosphorylation                                                                                                                                                                                                                                                                                                                                                                                                                                                                           |
| GRMZM2G164413 | -0.984845417       | 3.664500346              | 0.00657215  |     | 1 Not Annotated                                                                                            | Not Annotated                                                                                                                                                                                                                                                                                                                                                                                                                                                                                                                                                               |
| GRMZM2G002483 | -3.254279308       | -0.936057082             | 0.006697436 |     | 1 Mg_trans_NIPA                                                                                            | molecular_function cellular_component transport biological_process magnesium ion transmembrane transporter activity magnesium ion transport membrane transmembrane transporter activity                                                                                                                                                                                                                                                                                                                                                                                     |
| GRMZM2G144254 | -0.717340686       | 3.327151079              | 0.006814092 |     |                                                                                                            |                                                                                                                                                                                                                                                                                                                                                                                                                                                                                                                                                                             |

| Gene             | log2 (fold change) | log2 (count per million) | P-value     | FDR | Interpro                                                                                                                        | GO                                                                                                                                                                                                                                                                                                                                                                                                                                                                                                                                                                                                                                                                                                                                                                               |
|------------------|--------------------|--------------------------|-------------|-----|---------------------------------------------------------------------------------------------------------------------------------|----------------------------------------------------------------------------------------------------------------------------------------------------------------------------------------------------------------------------------------------------------------------------------------------------------------------------------------------------------------------------------------------------------------------------------------------------------------------------------------------------------------------------------------------------------------------------------------------------------------------------------------------------------------------------------------------------------------------------------------------------------------------------------|
| GRMZM2G151227    | -0.98187846        | 1.323884005              | 0.006849364 | 1   | Chalcone/stilbene_synthase_N Polyketide_synthase_type-III Chalcone/stilbene_synth_C Thiolase-like Chalcone/stilbene_synthase_AS | molecular_function catalytic activity cellular_component intracellular cell nucleus cytoplasm vacuole endoplasmic reticulum transport response to stress response to oxidative stress biological_process metabolic process biosynthetic process response to wounding response to gravity plant-type vacuole membrane chalcone biosynthetic process response to auxin response to jasmonic acid flavonoid biosynthetic process auxin polar transport response to UV-B naringenin-chalcone synthase activity transferase activity transferase activity, transferring acyl groups transferase activity, transferring acyl groups other than amino-acyl groups secondary metabolic process regulation of anthocyanin biosynthetic process organelle small molecule metabolic process |
| GRMZM2G034651    | 5.547690956        | -2.222025228             | 0.007007718 | 1   | Prp18 PRP4-like                                                                                                                 | cellular_component intracellular cell nucleus spliceosomal complex biological_process RNA splicing cellular nitrogen compound metabolic process organelle                                                                                                                                                                                                                                                                                                                                                                                                                                                                                                                                                                                                                        |
| GRMZM2G018080    | -0.879221227       | 2.778483541              | 0.007065718 | 1   | PsdUridine_synth_cat_dom                                                                                                        | maturacion de LSU-rRNA de transcritos tetracistronic de rRNA (SSU-rRNA, LSU-rRNA, 4.5S-rRNA, 5S-rRNA) maturacion de rRNA de transcritos tetracistronic (SSU-rRNA, LSU-rRNA, 4.5S-rRNA, 5S-rRNA) pseudouridine synthesis molecular_function RNA binding biological_process RNA modification chloroplast pseudouridine synthase activity isomerase activity plastid translation cellular nitrogen compound metabolic process                                                                                                                                                                                                                                                                                                                                                       |
| GRMZM2G008444    | -1.563917081       | 1.207010507              | 0.007173516 | 1   | Web                                                                                                                             | Not Annotated                                                                                                                                                                                                                                                                                                                                                                                                                                                                                                                                                                                                                                                                                                                                                                    |
| GRMZM2G134049    | -2.522880477       | 0.628582333              | 0.007183329 | 1   | Not Annotated                                                                                                                   | Not Annotated                                                                                                                                                                                                                                                                                                                                                                                                                                                                                                                                                                                                                                                                                                                                                                    |
| GRMZM2G007060    | -0.814704639       | 3.741492544              | 0.007285288 | 1   | Interferon-rel_develop_reg_N ARM-type_fold                                                                                      | molecular_function binding cellular_component intracellular cell nucleus cytoplasm response to stress biological_process response to salt stress organelle                                                                                                                                                                                                                                                                                                                                                                                                                                                                                                                                                                                                                       |
| AC217897.3_FG010 | 0.906506319        | 2.319577259              | 0.007317323 | 1   | DUF962                                                                                                                          | cellular_component integral component of membrane                                                                                                                                                                                                                                                                                                                                                                                                                                                                                                                                                                                                                                                                                                                                |
| GRMZM2G115481    | -1.092441266       | 4.753418857              | 0.007336809 | 1   | LURP1-like Tubby_C-like                                                                                                         | Not Annotated                                                                                                                                                                                                                                                                                                                                                                                                                                                                                                                                                                                                                                                                                                                                                                    |
| AC199526.5_FG003 | -1.084909445       | 1.321808792              | 0.007453762 | 1   | RNA-binding_CRM                                                                                                                 | Group II intron splicing molecular_function RNA binding cellular_component intracellular cell cytoplasm mRNA processing biological_process RNA splicing chloroplast plastid chloroplast stroma ribonucleoprotein complex cellular nitrogen compound metabolic process organelle                                                                                                                                                                                                                                                                                                                                                                                                                                                                                                  |
| GRMZM5G819302    | -0.717303902       | 6.332227913              | 0.007456597 | 1   | Not Annotated                                                                                                                   | Not Annotated                                                                                                                                                                                                                                                                                                                                                                                                                                                                                                                                                                                                                                                                                                                                                                    |
| GRMZM2G042278    | -1.071771095       | 1.184562088              | 0.00747005  | 1   | RWP-RK_dom GAF OPR_PB1                                                                                                          | molecular_function protein binding                                                                                                                                                                                                                                                                                                                                                                                                                                                                                                                                                                                                                                                                                                                                               |
| GRMZM2G150193    | -0.458724826       | 5.517381045              | 0.007541703 | 1   | DUF3456                                                                                                                         | Not Annotated                                                                                                                                                                                                                                                                                                                                                                                                                                                                                                                                                                                                                                                                                                                                                                    |
| GRMZM2G074423    | -0.652572532       | 3.133856496              | 0.007552913 | 1   | CHP01589_pln                                                                                                                    | Not Annotated                                                                                                                                                                                                                                                                                                                                                                                                                                                                                                                                                                                                                                                                                                                                                                    |
| GRMZM2G133895    | -0.473755917       | 4.879991773              | 0.007562363 | 1   | F-box_dom                                                                                                                       | molecular_function protein binding                                                                                                                                                                                                                                                                                                                                                                                                                                                                                                                                                                                                                                                                                                                                               |
| GRMZM2G095094    | -0.679731756       | 2.641190451              | 0.007600737 | 1   | Pentatricopeptide_repeat                                                                                                        | Not Annotated                                                                                                                                                                                                                                                                                                                                                                                                                                                                                                                                                                                                                                                                                                                                                                    |
| AC211707.4_FG003 | -2.895956836       | -1.027818225             | 0.007615616 | 1   | Not Annotated                                                                                                                   | Not Annotated                                                                                                                                                                                                                                                                                                                                                                                                                                                                                                                                                                                                                                                                                                                                                                    |
| GRMZM2G373738    | -1.450227949       | 2.746227352              | 0.007656951 | 1   | Small_GTPase_bd_dom Small_GTPase_Rab_type Small_GTPase                                                                          | molecular_function GTP binding transport signal transduction small GTPase mediated signal transduction biological_process protein transport                                                                                                                                                                                                                                                                                                                                                                                                                                                                                                                                                                                                                                      |

| Gene          | log2 (fold change) | log2 (count per million) | P-value     | FDR | Interpro                                                               | GO                                                                                                                                                                                                                                                                                                                                                                                                        |
|---------------|--------------------|--------------------------|-------------|-----|------------------------------------------------------------------------|-----------------------------------------------------------------------------------------------------------------------------------------------------------------------------------------------------------------------------------------------------------------------------------------------------------------------------------------------------------------------------------------------------------|
| GRMZM2G112377 | 4.876943149        | -1.027469125             | 0.00771517  | 1   | Phos_permease Sub_transporter MFS_domain general_subst_transpt MFS_dom | molecular_function inorganic phosphate transmembrane transporter activity cellular_component intracellular cell nucleus cytoplasm vacuole plasma membrane transport phosphate ion transport response to stress biological_process response to abscisic acid integral component of membrane cellular response to phosphate starvation transmembrane transporter activity organelle transmembrane transport |
| GRMZM2G046911 | -0.530820501       | 6.757560522              | 0.007748356 | 1   | Not Annotated                                                          | endosome Golgi apparatus trans-Golgi network                                                                                                                                                                                                                                                                                                                                                              |
| GRMZM2G409101 | 6.300469516        | -1.314327898             | 0.007775047 | 1   | Not Annotated                                                          | Not Annotated                                                                                                                                                                                                                                                                                                                                                                                             |
| GRMZM2G026847 | 1.318163726        | -1.706830568             | 0.007838225 | 1   | Not Annotated                                                          | Not Annotated                                                                                                                                                                                                                                                                                                                                                                                             |
| GRMZM2G434839 | 3.363336458        | -1.422805039             | 0.007871278 | 1   | DnaJ_C HSP_DnaJ_Cys-rich_dom HSP40/DnaJ_pept-bd                        | molecular_function protein folding biological_process heat shock protein binding unfolded protein binding                                                                                                                                                                                                                                                                                                 |
| GRMZM2G303587 | 6.214150217        | -1.470769434             | 0.007924992 | 1   | Pentatricopeptide_repeat                                               | Not Annotated                                                                                                                                                                                                                                                                                                                                                                                             |
| GRMZM2G447218 | -4.849778971       | 0.588772886              | 0.007964178 | 1   | Not Annotated                                                          | Not Annotated                                                                                                                                                                                                                                                                                                                                                                                             |
| GRMZM2G362745 | -1.336654018       | 0.218361396              | 0.007988236 | 1   | Not Annotated                                                          | Not Annotated                                                                                                                                                                                                                                                                                                                                                                                             |
| GRMZM5G830549 | -3.451665735       | -0.697524007             | 0.00804236  | 1   | Not Annotated                                                          | Not Annotated                                                                                                                                                                                                                                                                                                                                                                                             |
| GRMZM2G084421 | -1.01836102        | 3.897547298              | 0.008090427 | 1   | Not Annotated                                                          | Not Annotated                                                                                                                                                                                                                                                                                                                                                                                             |
| GRMZM2G444743 | -1.767696837       | 4.587913205              | 0.008122344 | 1   | Not Annotated                                                          | Not Annotated                                                                                                                                                                                                                                                                                                                                                                                             |
| GRMZM2G075974 | -0.821957561       | 5.811928213              | 0.008156284 | 1   | GATASE                                                                 | Not Annotated                                                                                                                                                                                                                                                                                                                                                                                             |
| GRMZM2G013832 | -6.969409266       | -0.155156664             | 0.008198658 | 1   | Not Annotated                                                          | Not Annotated                                                                                                                                                                                                                                                                                                                                                                                             |
| GRMZM2G117016 | -1.298393056       | 3.167336702              | 0.008210344 | 1   | Not Annotated                                                          | Not Annotated                                                                                                                                                                                                                                                                                                                                                                                             |
| GRMZM2G702613 | -1.023006543       | 3.210883768              | 0.008244888 | 1   | RNA_pol_Rpb8 NA-bd_OB-fold                                             | transcription, DNA-templated biological_process biosynthetic process cellular nitrogen compound metabolic process                                                                                                                                                                                                                                                                                         |
| GRMZM2G700063 | -1.600236864       | 0.640181954              | 0.008260628 | 1   | Not Annotated                                                          | Not Annotated                                                                                                                                                                                                                                                                                                                                                                                             |
| GRMZM2G097132 | 1.049841953        | 0.410272144              | 0.008469246 | 1   | Oxoglu/Fe-dep_dioxygenase                                              | molecular_function biological_process oxidoreductase activity oxidoreductase activity, acting on paired donors, with incorporation or reduction of molecular oxygen, 2-oxoglutarate as one donor, and incorporation of one atom each of oxygen into both donors oxidation-reduction process                                                                                                               |
| GRMZM2G485905 | -1.179335444       | 1.070076963              | 0.008490088 | 1   | Not Annotated                                                          | Not Annotated                                                                                                                                                                                                                                                                                                                                                                                             |
| GRMZM2G049288 | -0.616270615       | 4.04575803               | 0.008505482 | 1   | DnaJ_domain ARM-type_fold DUF4339                                      | molecular_function binding                                                                                                                                                                                                                                                                                                                                                                                |
| GRMZM2G032070 | -1.339672828       | 5.040534427              | 0.008587047 | 1   | TF_Kbox                                                                | nucleic acid binding transcription factor activity molecular_function sequence-specific DNA binding transcription factor activity cellular_component intracellular cell nucleus regulation of transcription, DNA-templated biological_process organelle                                                                                                                                                   |
| GRMZM2G022866 | -0.789392038       | 2.733024809              | 0.008639132 | 1   | Glutaredoxin GLR_AS Thioredoxin-like_fold Glutathione_S-Trfase_N       | molecular_function biological_process electron carrier activity protein disulfide oxidoreductase activity oxidoreductase activity homeostatic process cell redox homeostasis protein binding cellular_component intracellular cell cytoplasm chloroplast chloroplast thylakoid membrane plastid thylakoid organelle                                                                                       |
| GRMZM2G397948 | -0.848700206       | 2.614466589              | 0.008668804 | 1   | BTB/POZ_fold BACK                                                      | molecular_function protein binding                                                                                                                                                                                                                                                                                                                                                                        |
| GRMZM5G832248 | -0.664403417       | 4.472861881              | 0.00868027  | 1   | RRM_dom CC1_SF                                                         | nucleotide binding molecular_function nucleic acid binding RNA binding cellular_component intracellular cell nucleus mRNA processing biological_process cellular nitrogen compound metabolic process organelle                                                                                                                                                                                            |
| GRMZM2G013970 | -0.731385003       | 3.028588504              | 0.008734367 | 1   | a-crystallin/Hsp20_dom HSP20-like_chaperone                            | Not Annotated                                                                                                                                                                                                                                                                                                                                                                                             |



| Gene             | log2 (fold change) | log2 (count per million) | P-value     | FDR | Interpro                                                                                                                            | GO                                                                                                                                                                                                                                                                                                                                                                                                                                                                                                               |
|------------------|--------------------|--------------------------|-------------|-----|-------------------------------------------------------------------------------------------------------------------------------------|------------------------------------------------------------------------------------------------------------------------------------------------------------------------------------------------------------------------------------------------------------------------------------------------------------------------------------------------------------------------------------------------------------------------------------------------------------------------------------------------------------------|
| GRMZM2G038973    | -1.125067732       | 2.763073598              | 0.008760094 | 1   | Gal_mutarotase_SF_dom Glyco_hydro_38_C                                                                                              | molecular_function catalytic activity carbohydrate metabolic process mannose metabolic process biological_process mannosidase activity hydrolase activity, acting on glycosyl bonds carbohydrate binding nucleic acid binding transcription factor activity molecular_function DNA binding sequence-specific DNA binding transcription factor activity regulation of transcription, DNA-templated biological_process                                                                                             |
| GRMZM5G816314    | -6.097716152       | -1.571340689             | 0.008893162 | 1   | AP2/ERF_dom DNA-bd_dom                                                                                                              | molecular_function catalytic activity alpha,alpha-trehalose-phosphate synthase (UDP-forming) activity carbohydrate metabolic process trehalose biosynthetic process biological_process biosynthetic process transferase activity, transferring glycosyl groups                                                                                                                                                                                                                                                   |
| GRMZM2G068943    | -0.504850388       | 4.502108309              | 0.008970608 | 1   | Trehalose_PPase Glyco_trans_20 Trehalose_OtsA HAD-like_dom                                                                          | molecular_function catalytic activity carbohydrate metabolic process trehalose biosynthetic process biological_process metabolic process biosynthetic process                                                                                                                                                                                                                                                                                                                                                    |
| GRMZM2G140078    | -1.373006347       | 1.867166211              | 0.008971858 | 1   | Trehalose_PPase HAD-SF_hydro_IB HAD-like_dom                                                                                        | molecular_function protein binding cellular_component intracellular cell cytoplasm biological_processes methyltransferase activity chloroplast plastid transferase activity [ribulose-bisphosphate carboxylase]-lysine N-methyltransferase activity methylation organelle                                                                                                                                                                                                                                        |
| GRMZM2G077258    | -0.60002243        | 4.270083536              | 0.008985015 | 1   | SET_dom Rubisco_LSM_T_MeTrfase_plant Rubisco_LSM_T_subst-bd                                                                         | molecular_function cellular amino acid metabolic process biological_process lyase activity small molecule metabolic process                                                                                                                                                                                                                                                                                                                                                                                      |
| GRMZM5G871471    | -0.776087794       | 5.6169208                | 0.009121027 | 1   | ArAA_elim_lyase Thrdolase PyrdxIP-dep_Trfase                                                                                        | molecular_function catalytic activity hydrolase activity, hydrolyzing O-glycosyl compounds beta-galactosidase activity carbohydrate metabolic process biological_process metabolic process hydrolase activity hydrolase activity, acting on glycosyl bonds cell wall plant-type cell wall plasmodesma                                                                                                                                                                                                            |
| GRMZM2G121495    | -1.072268277       | 1.48262448               | 0.009124035 | 1   | Glycoside_Hdrfase_35 Galactose-bd-like Glycoside_hydrolyase_SF Glyco_hydro_35_1_CS                                                  | molecular_function protein binding                                                                                                                                                                                                                                                                                                                                                                                                                                                                               |
| GRMZM2G018573    | -0.592458644       | 3.540566056              | 0.009159184 | 1   | WD40_repeat WD40_repeat_dom                                                                                                         | molecular_function biological_process metabolic process 4 iron, 4 sulfur cluster binding                                                                                                                                                                                                                                                                                                                                                                                                                         |
| GRMZM2G467338    | -0.723600108       | 3.035214603              | 0.009179086 | 1   | Acoase/IPM_deHydtase_Isu_aba AconitaseA/IPMdeHydase_ssu_sww Aconitase/Fe_reg_prot_2 Aconitase/3IPM_dehydase_sww Aconitase_4Fe-4S_BS | Not Annotated                                                                                                                                                                                                                                                                                                                                                                                                                                                                                                    |
| GRMZM2G488067    | -2.05050308        | 1.122284268              | 0.009237387 | 1   | Not Annotated                                                                                                                       | molecular_function catalytic activity cytosol lipid metabolic process biological_process biosynthetic process response to wounding jasmonic acid biosynthetic process response to salicylic acid FMN binding oxidoreductase activity 12-oxophytodienoate reductase activity oxylipin metabolic process small molecule metabolic process response to cadmium ion oxidation-reduction process                                                                                                                      |
| GRMZM2G000236    | -0.645289033       | 2.816720561              | 0.009292368 | 1   | OxRdtase_FMN_N                                                                                                                      | molecular_function amidophosphoribosyltransferase activity cell wall cytosol purine nucleotide biosynthetic process 'de novo' IMP biosynthetic process biological_process metabolic process biosynthetic process purine nucleobase biosynthetic process nucleoside metabolic process plastid stroma chloroplast organization transferase activity transferase activity, transferring glycosyl groups cellular nitrogen compound metabolic process ion binding small molecule metabolic process metal ion binding |
| AC188838.3_FG005 | 4.195463902        | -1.088467503             | 0.009321716 | 1   | PRibTrfase_dom GATase_dom Amd_phospho_trans GATase_2_dom                                                                            | Not Annotated                                                                                                                                                                                                                                                                                                                                                                                                                                                                                                    |
| GRMZM5G886969    | -0.884074067       | 4.755108733              | 0.009345917 | 1   | Not Annotated                                                                                                                       | Not Annotated                                                                                                                                                                                                                                                                                                                                                                                                                                                                                                    |

| Gene             | log2 (fold change) | log2 (count per million) | P-value     | FDR | Interpro                                                               | GO                                                                                                                                                                                                                                                                                                                                                                                                                                                                                     |
|------------------|--------------------|--------------------------|-------------|-----|------------------------------------------------------------------------|----------------------------------------------------------------------------------------------------------------------------------------------------------------------------------------------------------------------------------------------------------------------------------------------------------------------------------------------------------------------------------------------------------------------------------------------------------------------------------------|
| GRMZM2G087364    | -5.66464753        | -1.658204622             | 0.009417217 |     | Essential_protein_Yae1_N                                               | Not Annotated                                                                                                                                                                                                                                                                                                                                                                                                                                                                          |
| GRMZM5G808787    | -1.846880808       | 0.531896146              | 0.009427906 |     | 1 Not Annotated                                                        | Not Annotated                                                                                                                                                                                                                                                                                                                                                                                                                                                                          |
| GRMZM2G120091    | -0.749202651       | 1.955056416              | 0.009437999 |     | 1 Not Annotated                                                        | Not Annotated                                                                                                                                                                                                                                                                                                                                                                                                                                                                          |
| GRMZM2G180155    | -0.982974348       | 1.639409833              | 0.009517943 |     | 1 Not Annotated                                                        | molecular_function glutamine-fructose-6-phosphate transaminase (isomerizing) cellular_component intracellular cell cytoplasm carbohydrate metabolic process biological_process biosynthetic process carbohydrate biosynthetic process                                                                                                                                                                                                                                                  |
| GRMZM2G163178    | -0.902570307       | 3.337186925              | 0.009522621 |     | 1 Not Annotated                                                        | Not Annotated                                                                                                                                                                                                                                                                                                                                                                                                                                                                          |
| AC199820.4_FG006 | 3.129090324        | -0.036128946             | 0.009534284 |     | SANT/Myb Myb_domain plants Homeodomain-like SANT_dom                   | molecular_function DNA binding chromatin binding                                                                                                                                                                                                                                                                                                                                                                                                                                       |
| GRMZM2G063844    | -2.10975519        | 1.654738738              | 0.009633814 |     | 1 Not Annotated                                                        | Not Annotated                                                                                                                                                                                                                                                                                                                                                                                                                                                                          |
| GRMZM2G162535    | -1.061884524       | 1.565253161              | 0.009774104 |     | 1 Not Annotated                                                        | Not Annotated                                                                                                                                                                                                                                                                                                                                                                                                                                                                          |
| GRMZM2G081573    | -0.873132711       | 2.331891913              | 0.009883864 |     | AAA+_ATPase ABC_transporter-like ABC_transpr_TM_dom ABC_transporter_CS | nucleotide binding molecular_function ATP binding cellular_component ATP catabolic process transport biological_process catabolic process integral component of membrane ATPase activity nucleoside-triphosphatase activity transmembrane transporter activity cellular nitrogen compound metabolic process nucleobase-containing compound catabolic process ATPase activity, coupled to transmembrane movement of substances small molecule metabolic process transmembrane transport |
| GRMZM2G426067    | -5.853733089       | -1.502187764             | 0.009901059 |     | 1 DUF604                                                               | molecular_function endoplasmic reticulum transferase activity                                                                                                                                                                                                                                                                                                                                                                                                                          |
| GRMZM5G872120    | -1.484656723       | 0.261933147              | 0.009934576 |     | 1 Not Annotated                                                        | Not Annotated                                                                                                                                                                                                                                                                                                                                                                                                                                                                          |
| GRMZM2G532970    | -1.224928243       | 1.835291948              | 0.0099487   |     | 1 Not Annotated                                                        | Not Annotated                                                                                                                                                                                                                                                                                                                                                                                                                                                                          |
| GRMZM2G700208    | -2.188514363       | 0.147690609              | 0.010052505 |     | 1 Lipase_GDSL                                                          | molecular_function lipid metabolic process biological_process hydrolase activity hydrolase activity, acting on ester bonds                                                                                                                                                                                                                                                                                                                                                             |
| GRMZM2G024996    | -1.012146386       | 3.117957263              | 0.010110307 |     | 1 Not Annotated                                                        | Not Annotated                                                                                                                                                                                                                                                                                                                                                                                                                                                                          |
| GRMZM2G031352    | -0.488292011       | 4.365281392              | 0.010255252 |     | Clathrin/coatamer_adapter-like_N ARM-type_fold                         | molecular_function binding cellular_component intracellular cell cytoplasm transport intracellular protein transport biological_process vesicle-mediated transport membrane coat protein complex                                                                                                                                                                                                                                                                                       |
| GRMZM2G112792    | -1.61772991        | 0.232870987              | 0.010269519 |     | Oxid_FAD_bind_N ALDO FAD_OxRdtase_Pln FAD-linked_Oxase-like_C FAD-bd_2 | molecular_function catalytic activity cellular_component biological_process UDP-N-acetylmuramate dehydrogenase activity membrane oxidoreductase activity oxidoreductase activity, acting on CH-OH group of donors flavin adenine dinucleotide binding oxidation-reduction process                                                                                                                                                                                                      |
| GRMZM2G152888    | -0.507801704       | 3.008390894              | 0.010369726 |     | Aminotransferase_I/II Aminotrans_II_pyridoxalP_BS PyrdxIP-dep_Trfase   | molecular_function catalytic activity cellular_component intracellular cell cytoplasm vacuole endoplasmic reticulum lipid metabolic process biological_process metabolic process biosynthetic process pollen development photomorphogenesis membrane transferase activity pyridoxal phosphate binding cellular nitrogen compound metabolic process organelle small molecule metabolic process sphingosine biosynthetic process                                                         |
| GRMZM2G129232    | -1.966336955       | -0.726931381             | 0.010385813 |     | 1 Not Annotated                                                        | Not Annotated                                                                                                                                                                                                                                                                                                                                                                                                                                                                          |
| GRMZM2G106748    | -1.058681596       | 3.521547085              | 0.010509135 |     | LipOase_pln PLAT/LH2_dom Lipase_LipOase LipOase_C LipOase_CS           | molecular_function iron ion binding protein binding lipid metabolic process fatty acid biosynthetic process biological_process biosynthetic process linoleate 13S-lipoxygenase activity oxidoreductase activity oxidoreductase activity, acting on single donors with incorporation of molecular oxygen, incorporation of two atoms of oxygen oxylipin biosynthetic process ion binding small molecule metabolic process metal ion binding oxidation-reduction process                 |

| Gene          | log2 (fold change) | log2 (count per million) | P-value     | FDR | Interpro                                                                 | GO                                                                                                                                                                                                                                                                                                                                                                                                                                                        |
|---------------|--------------------|--------------------------|-------------|-----|--------------------------------------------------------------------------|-----------------------------------------------------------------------------------------------------------------------------------------------------------------------------------------------------------------------------------------------------------------------------------------------------------------------------------------------------------------------------------------------------------------------------------------------------------|
| GRMZM2G411159 | -1.041176638       | 3.677441751              | 0.010522069 | 1   | PMR5_N_dom PC-Esterase                                                   | response to stress biological_process response to cold response to freezing                                                                                                                                                                                                                                                                                                                                                                               |
| GRMZM2G439589 | -0.716124414       | 2.929581996              | 0.010559514 | 1   | Not Annotated                                                            | Not Annotated                                                                                                                                                                                                                                                                                                                                                                                                                                             |
| GRMZM2G310069 | -1.00796365        | 2.490948067              | 0.010716253 | 1   | Metal-dep_hydrolase_compote Amidohydro_3                                 | molecular_function cellular_component intracellular cell cytoplasm endoplasmic reticulum cellular amino acid metabolic process biological_process catabolic process hydrolase activity, acting on carbon-nitrogen (but not peptide) bonds hydrolase activity, acting on carbon-nitrogen (but not peptide) bonds, in cyclic amides histidine catabolic process to glutamate and formamide small molecule metabolic process perinuclear region of cytoplasm |
| GRMZM2G154267 | -0.705960969       | 2.504279784              | 0.010769513 | 1   | DNA_pol_alpha/epsilon DNA_pol_e_bsu DNA_pol_e_bsu_N                      | nuclear chromosome molecular_function DNA binding DNA-directed DNA polymerase activity cellular_component intracellular cell nucleus chromosome DNA metabolic process DNA replication DNA-dependent DNA replication biological_process epsilon DNA polymerase complex biosynthetic process nucleotidyltransferase activity cellular nitrogen compound metabolic process organelle protein complex                                                         |
| GRMZM2G518717 | -0.534226695       | 5.543164355              | 0.010779394 | 1   | Not Annotated                                                            | Not Annotated                                                                                                                                                                                                                                                                                                                                                                                                                                             |
| GRMZM2G089948 | -0.717001766       | 1.994169885              | 0.010923158 | 1   | Peptidase_S9A Peptidase_S9                                               | molecular_function serine-type endopeptidase activity cellular_component intracellular cell cytoplasm proteolysis biological_process peptidase activity serine-type peptidase activity chloroplast plastid organelle                                                                                                                                                                                                                                      |
| GRMZM2G307600 | -2.392466064       | 1.239759681              | 0.010966894 | 1   | Not Annotated                                                            | cellular_component intracellular cell cytoplasm chloroplast plastid organelle                                                                                                                                                                                                                                                                                                                                                                             |
| GRMZM2G392101 | -0.874143425       | 1.309749172              | 0.010989546 | 1   | Sig_transdc_resp-reg_receiver CheY-like_superfamily                      | phosphorelay response regulator activity phosphorelay signal transduction system molecular_function signal transducer activity cellular_component intracellular cell nucleus cytoplasm mitochondrion regulation of transcription, DNA-templated signal transduction circadian rhythm biological_process plastid response to cytokinin response to red light intracellular signal transduction organelle                                                   |
| GRMZM2G168002 | -2.044574048       | 0.525145561              | 0.010998445 | 1   | Myb_CC_LHEQLE SANT/Myb Myb_dom_plants Homeodomain-like                   | molecular_function DNA binding chromatin binding                                                                                                                                                                                                                                                                                                                                                                                                          |
| GRMZM5G839976 | -1.586196992       | 0.229196061              | 0.011012123 | 1   | Not Annotated                                                            | Not Annotated                                                                                                                                                                                                                                                                                                                                                                                                                                             |
| GRMZM5G805351 | -1.586196992       | 0.229198748              | 0.011013583 | 1   | Not Annotated                                                            | Not Annotated                                                                                                                                                                                                                                                                                                                                                                                                                                             |
| GRMZM2G168096 | -0.408280184       | 5.474699235              | 0.011032365 | 1   | Helicase_C HEAT SNF2_N Helicase_ATP-bd ARM-type_fold HEAT_type_2 DUF3535 | molecular_function nucleic acid binding DNA binding helicase activity binding protein binding ATP binding                                                                                                                                                                                                                                                                                                                                                 |
| GRMZM2G369522 | -6.841205151       | -0.420142945             | 0.01104742  | 1   | Cyt_c_oxidase_su3                                                        | molecular_function cellular_component heme-copper terminal oxidase activity membrane oxidoreductase activity                                                                                                                                                                                                                                                                                                                                              |
| GRMZM2G434572 | 1.265514305        | 0.693923816              | 0.011050036 | 1   | Acireductn_dOase_familily RmlC_Cupin                                     | molecular_function biological_process acireductone dioxygenase [iron(II)-requiring] activity oxidoreductase activity oxidation-reduction process                                                                                                                                                                                                                                                                                                          |
| GRMZM2G095244 | -0.649958789       | 5.530829098              | 0.011096081 | 1   | Not Annotated                                                            | Not Annotated                                                                                                                                                                                                                                                                                                                                                                                                                                             |
| GRMZM2G051427 | 2.380532797        | -2.114062355             | 0.011124972 | 1   | Not Annotated                                                            | Not Annotated                                                                                                                                                                                                                                                                                                                                                                                                                                             |
| GRMZM2G134329 | -0.818968679       | 1.968864009              | 0.011183391 | 1   | TMEM194                                                                  | Not Annotated                                                                                                                                                                                                                                                                                                                                                                                                                                             |
| GRMZM2G158736 | -0.957225429       | 2.670872732              | 0.011283039 | 1   | Not Annotated                                                            | Not Annotated                                                                                                                                                                                                                                                                                                                                                                                                                                             |

| Gene             | log2 (fold change) | log2 (count per million) | P-value     | FDR | Interpro                                                                                            | GO                                                                                                                                                                                                                                                                                                                 |
|------------------|--------------------|--------------------------|-------------|-----|-----------------------------------------------------------------------------------------------------|--------------------------------------------------------------------------------------------------------------------------------------------------------------------------------------------------------------------------------------------------------------------------------------------------------------------|
| GRMZM2G456669    | -2.96220322        | -1.106488695             | 0.011283165 | 1   | Leu-rich_rpt Prot_kinase_dom Ser/Thr_kinase_AS Kinase-like_dom LRR-contain_N2 Protein_kinase_ATP_BS | molecular_function protein kinase activity protein serine/threonine kinase activity protein binding ATP binding cellular protein modification process protein phosphorylation biological_process kinase activity transferase activity, transferring phosphorus-containing groups                                   |
| GRMZM2G176647    | -1.161917877       | 1.710104585              | 0.011286863 | 1   | WD40_repeat Lg C_dom WD40_repeat_dom                                                                | molecular_function protein binding                                                                                                                                                                                                                                                                                 |
| GRMZM2G304638    | -0.83886525        | 3.154590616              | 0.011382357 | 1   | BEACH_dom Pep_chain_release_fac_I_II                                                                | molecular_function RNA binding translation release factor activity translation translational termination translation factor activity, nucleic acid binding biological_process biosynthetic process                                                                                                                 |
| GRMZM2G087513    | -0.746048482       | 3.047983807              | 0.011391507 | 1   | GDP-Fuc_O-FucTrfase FucosylTrfase_pln                                                               | cellular_component intracellular cell nucleus cytoplasm organelle                                                                                                                                                                                                                                                  |
| GRMZM2G437435    | -2.429186513       | -0.670402868             | 0.011409208 | 1   | Peptidase_S8/S53_dom Inhibitor_I9 Peptidase_S8_subtilisin-rel Peptidase_S8_Asp-AS                   | molecular_function serine-type endopeptidase activity proteolysis biological_process peptidase activity serine-type peptidase activity hydrolase activity identical protein binding negative regulation of catalytic activity                                                                                      |
| GRMZM2G049623    | -0.636790943       | 4.730911922              | 0.011423852 | 1   | Pumilio_RNA-bd_rpt ARM-type_fold                                                                    | molecular_function RNA binding binding                                                                                                                                                                                                                                                                             |
| GRMZM2G448633    | -0.897808899       | 2.87830792               | 0.011460022 | 1   | Ser/Thr_dual-sp_kinase_dom Prot_kinase_AS Kinase-like_dom                                           | molecular_function protein kinase activity protein serine/threonine kinase activity ATP binding cellular_component intracellular cell cytoplasm cellular protein modification process protein phosphorylation biological_process kinase activity transferase activity, transferring phosphorus-containing groups   |
| GRMZM2G178919    | -0.495625376       | 3.373834527              | 0.011509188 | 1   | Not Annotated                                                                                       | Not Annotated                                                                                                                                                                                                                                                                                                      |
| GRMZM2G345081    | -1.143785156       | 3.034195019              | 0.011537882 | 1   | Not Annotated                                                                                       | Not Annotated                                                                                                                                                                                                                                                                                                      |
| GRMZM2G024476    | -1.465478698       | 0.661039995              | 0.011546457 | 1   | Oxy_OxRdtase_FAD_BS Oxid_FAD_bind_N Cytokinin_DH_FAD/cytokin-bd FAD-linked_Oxase-like_C FAD-bd_2    | molecular_function catalytic activity biological_process UDP-N-acetylmuramate dehydrogenase activity cytokinin metabolic process oxidoreductase activity oxidoreductase activity, acting on CH-OH group of donors cytokinin dehydrogenase activity flavin adenine dinucleotide binding oxidation-reduction process |
| GRMZM2G002034    | 2.028629219        | -0.652415686             | 0.011591587 | 1   | Glyco_hydro_28 PbH1 Pectin_lyase_fold/virulence                                                     | molecular_function polygalacturonase activity cellular_component extracellular region carbohydrate metabolic process biological_process metabolic process hydrolase activity hydrolase activity, acting on glycosyl bonds                                                                                          |
| GRMZM2G152011    | 1.730410483        | 0.364123387              | 0.011648307 | 1   | Not Annotated                                                                                       | Not Annotated                                                                                                                                                                                                                                                                                                      |
| GRMZM2G381386    | -0.793947054       | 3.489733311              | 0.011727501 | 1   | Znf_RING Helicase_C                                                                                 | molecular_function nucleic acid binding helicase activity protein binding ATP binding zinc ion binding ion binding                                                                                                                                                                                                 |
| GRMZM2G060265    | -2.052432252       | 0.45832584               | 0.011777379 | 1   | TF_GRAS                                                                                             | Not Annotated                                                                                                                                                                                                                                                                                                      |
| AC209206.3_FG014 | 1.595069898        | 3.869983492              | 0.011788603 | 1   | Tyrosinase Unchr_dicopper_centre Polyphenol_oxidase Polyphenol_oxidase_cen Polyphenol_oxidase_C     | molecular_function catechol oxidase activity biological_process metabolic process biosynthetic process oxidoreductase activity ion binding pigment biosynthetic process metal ion binding oxidation-reduction process                                                                                              |

| Gene             | log2 (fold change) | log2 (count per million) | P-value     | FDR | Interpro                                                                                      | GO                                                                                                                                                                                                                                                                                                                                                                                                                                                                                                                                                                                                                                                                                                                                                                |
|------------------|--------------------|--------------------------|-------------|-----|-----------------------------------------------------------------------------------------------|-------------------------------------------------------------------------------------------------------------------------------------------------------------------------------------------------------------------------------------------------------------------------------------------------------------------------------------------------------------------------------------------------------------------------------------------------------------------------------------------------------------------------------------------------------------------------------------------------------------------------------------------------------------------------------------------------------------------------------------------------------------------|
| GRMZM2G474194    | 0.906550916        | 3.480932778              | 0.011854727 | 1   | LolPI Expansin/allergen_DPBB_dom Expansin_CBD Expansin_Lol_pl RlpA-like_DPBB                  | reproduction cellular_component extracellular region biological_process sexual reproduction                                                                                                                                                                                                                                                                                                                                                                                                                                                                                                                                                                                                                                                                       |
| GRMZM2G343317    | 0.540641142        | -0.234132169             | 0.01191484  | 1   | Not Annotated                                                                                 | Not Annotated                                                                                                                                                                                                                                                                                                                                                                                                                                                                                                                                                                                                                                                                                                                                                     |
| GRMZM2G346693    | -0.726464746       | 2.873204116              | 0.011930275 | 1   | Aminotrans_3 PyrdxLP-dep_Trfase                                                               | molecular_function transaminase activity pyridoxal phosphate binding                                                                                                                                                                                                                                                                                                                                                                                                                                                                                                                                                                                                                                                                                              |
| GRMZM2G164440    | 1.055562807        | 5.647797188              | 0.012060524 | 1   | Bifunc_inhib/LTP/seed_store                                                                   | Not Annotated                                                                                                                                                                                                                                                                                                                                                                                                                                                                                                                                                                                                                                                                                                                                                     |
| GRMZM2G340955    | -2.139929119       | -1.134857897             | 0.012082472 | 1   | TIM-br_IGPS-like Pyrv/PenolPyrv_Kinase-like_dom                                               | molecular_function catalytic activity                                                                                                                                                                                                                                                                                                                                                                                                                                                                                                                                                                                                                                                                                                                             |
| GRMZM2G015333    | 2.485104212        | 2.478543422              | 0.01209107  | 1   | Disease-R_pln                                                                                 | Not Annotated                                                                                                                                                                                                                                                                                                                                                                                                                                                                                                                                                                                                                                                                                                                                                     |
| GRMZM2G144662    | -1.284408755       | 1.369859923              | 0.012119074 | 1   | Ribosomal_L30_N Lipase_GDSL                                                                   | molecular_function lipid metabolic process biological_process hydrolase activity, acting on ester bonds                                                                                                                                                                                                                                                                                                                                                                                                                                                                                                                                                                                                                                                           |
| AC195685.3_FG001 | 2.188585604        | -0.964435294             | 0.012119884 | 1   | Pectin_lyase_fold/virulence DNA_recomb/repair_Rad51_C DNA_recomb/repair_RecA-like RecA_ATP-bd | molecular_function DNA binding ATP binding DNA metabolic process DNA dependent ATPase activity biological_process ATPase activity cellular nitrogen compound metabolic process chiasma assembly                                                                                                                                                                                                                                                                                                                                                                                                                                                                                                                                                                   |
| GRMZM2G032887    | -0.959068364       | 3.027717192              | 0.012132956 | 1   | Transl_elong_EFTu/EF1A_C Transl_elong_EF1A/Init_IF2_C                                         | molecular_function GTP binding                                                                                                                                                                                                                                                                                                                                                                                                                                                                                                                                                                                                                                                                                                                                    |
| GRMZM2G032628    | -0.454705708       | 10.33662228              | 0.012281289 | 1   | Glyco_hydro_13_N Glyco_hydro_13_cat_dom A-amylase_b_C GlgB Ige-set Glycoside_hydrolase_SF     | molecular_function catalytic activity 1,4-alpha-glucan branching enzyme activity hydrolase activity, hydrolyzing O-glycosyl compounds cellular_component intracellular cell cytoplasm carbohydrate metabolic process glycogen biosynthetic process starch metabolic process generation of precursor metabolites and energy biological_process biosynthetic process amyloplast chloroplast plastid chloroplast stroma transferase activity transferase activity, transferring glycosyl groups hydrolase activity, acting on glycosyl bonds starch biosynthetic process ion binding cation binding organelle cellular response to sucrose stimulus cellular response to fructose stimulus cellular response to glucose stimulus cellular response to light stimulus |
| GRMZM2G052279    | -0.766417814       | 3.815685069              | 0.012325034 | 1   | DUF3754                                                                                       | Not Annotated                                                                                                                                                                                                                                                                                                                                                                                                                                                                                                                                                                                                                                                                                                                                                     |
| GRMZM2G090168    | 2.307470256        | 2.318092558              | 0.012455396 | 1   | WD40_repeat WD40_repeat_dom WD40_repeat_CS                                                    | molecular_function protein binding                                                                                                                                                                                                                                                                                                                                                                                                                                                                                                                                                                                                                                                                                                                                |
| GRMZM2G313327    | -1.731221592       | 0.19630454               | 0.012535833 | 1   | DUF1005                                                                                       | Not Annotated                                                                                                                                                                                                                                                                                                                                                                                                                                                                                                                                                                                                                                                                                                                                                     |
| GRMZM5G859107    | -1.551797997       | 0.418324986              | 0.012708584 | 1   | Not Annotated                                                                                 | Not Annotated                                                                                                                                                                                                                                                                                                                                                                                                                                                                                                                                                                                                                                                                                                                                                     |
| GRMZM2G167902    | -0.893292728       | 3.865244943              | 0.012743885 | 1   | Not Annotated                                                                                 | Not Annotated                                                                                                                                                                                                                                                                                                                                                                                                                                                                                                                                                                                                                                                                                                                                                     |
| GRMZM5G807602    | -1.401141714       | 1.43483568               | 0.012744222 | 1   | LEA-14                                                                                        | immune system process cellular_component cell wall cell response to stress biological_process plant-type cell wall external encapsulating structure defense response to virus                                                                                                                                                                                                                                                                                                                                                                                                                                                                                                                                                                                     |
| GRMZM2G040158    | -0.751037503       | 3.492307146              | 0.012754112 | 1   | Cation/H_exchanger                                                                            | molecular_function cellular_component transport cation transport biological_process solute:hydrogen antiporter activity integral component of membrane transmembrane transporter activity transmembrane transport                                                                                                                                                                                                                                                                                                                                                                                                                                                                                                                                                 |

| Gene          | log2 (fold change) | log2 (count per million) | P-value     | FDR | Interpro                                                                                                     | GO                                                                                                                                                                                                                                                                                                                                                                                                                                                                                               |
|---------------|--------------------|--------------------------|-------------|-----|--------------------------------------------------------------------------------------------------------------|--------------------------------------------------------------------------------------------------------------------------------------------------------------------------------------------------------------------------------------------------------------------------------------------------------------------------------------------------------------------------------------------------------------------------------------------------------------------------------------------------|
| GRMZM2G360681 | 0.491551084        | 5.828641628              | 0.012758113 | 1   | Clp_N ATPase_AAA_core AAA+ATPase ClpA/B ATPase_AAA-2 ClpA/B_CS1 Clp_ATPase_C                                 | nucleotide binding molecular_function ATP binding response to stress biological_process response to heat chloroplast stroma response to high light intensity chloroplast envelope nucleoside-triphosphatase activity protein metabolic process response to hydrogen peroxide protein unfolding positive regulation of translation                                                                                                                                                                |
| GRMZM2G448344 | 1.688172178        | 1.301116772              | 0.012786576 | 1   | RuBisCO_Isu_C RuBisCO_Isu_fd_N RuBisCO_Isu_N RuBisCo_large_chain_AS                                          | magnesium ion binding molecular_function monooxygenase activity cellular_component intracellular cell cytoplasm carbohydrate metabolic process biological_process biosynthetic process chloroplast plastid photorespiration carbon fixation photosynthesis oxidoreductase activity lyase activity ribulose-bisphosphate carboxylase activity reductive pentose-phosphate cycle ion binding organelle metal ion binding oxidation-reduction process                                               |
| GRMZM2G094532 | -0.811843251       | 3.945785859              | 0.012819438 | 1   | Zein-bd                                                                                                      | Not Annotated                                                                                                                                                                                                                                                                                                                                                                                                                                                                                    |
| GRMZM2G160685 | -2.137686544       | 0.176675467              | 0.012825353 | 1   | FAD_bind_dom Kinesin_motor_dom                                                                               | molecular_function microtubule motor activity ATP binding cellular_component intracellular cell cytoskeleton microtubule associated complex generation of precursor metabolites and energy microtubule-based movement biological_process oxidoreductase activity oxidoreductase activity, acting on the CH-CH group of donors electron transport chain organelle protein complex flavin adenine dinucleotide binding oxidation-reduction process                                                 |
| GRMZM2G825978 | -0.944621112       | 3.092505909              | 0.012910307 | 1   | Not Annotated                                                                                                | Not Annotated                                                                                                                                                                                                                                                                                                                                                                                                                                                                                    |
| GRMZM2G083138 | -0.832166274       | 1.356378916              | 0.012910356 | 1   | Helicase_C                                                                                                   | double-strand break repair via homologous recombination molecular_function nucleic acid binding helicase activity ATP binding response to gamma radiation double-strand break repair via synthesis-dependent strand annealing                                                                                                                                                                                                                                                                    |
| GRMZM2G103382 | -1.345180128       | 0.135988822              | 0.012952252 | 1   | GlyceroP-diester-Pdiesterase PLC-like_Pdiesterase_TIM-brl                                                    | molecular_function carbohydrate metabolic process glycerol metabolic process lipid metabolic process phosphoric diester hydrolase activity biological_process glycerophosphodiester phosphodiesterase activity small molecule metabolic process                                                                                                                                                                                                                                                  |
| GRMZM2G065284 | -2.895956836       | -1.165479607             | 0.012993944 | 1   | Znf_CCHC                                                                                                     | molecular_function nucleic acid binding zinc ion binding ion binding metal ion binding                                                                                                                                                                                                                                                                                                                                                                                                           |
| GRMZM2G702406 | -1.563244323       | 1.484715077              | 0.013000684 | 1   | NA-bd_OB-fold Rep_factor-A_C                                                                                 | Not Annotated                                                                                                                                                                                                                                                                                                                                                                                                                                                                                    |
| GRMZM2G332843 | 1.156136627        | 1.3655538                | 0.013014873 | 1   | Pentatricopeptide_repeat                                                                                     | Not Annotated                                                                                                                                                                                                                                                                                                                                                                                                                                                                                    |
| GRMZM2G067456 | -0.833539958       | 6.129934145              | 0.013106133 | 1   | Ribosomal_L2 Translation_prot_SH3-like NA-bd_OB-fold Rbsml_prot_L2_RNA-bd_dom Ribosomal_L2_C Ribosomal_L2_CS | molecular_function RNA binding structural constituent of ribosome structural molecule activity cellular_component intracellular cell nucleus nucleolus cytoplasm vacuole cytosol ribosome plasma membrane translation biological_process biosynthetic process chloroplast plastid large ribosomal subunit cytosolic large ribosomal subunit cytosolic ribosome organelle                                                                                                                         |
| GRMZM2G149224 | -0.463196619       | 4.727144149              | 0.01316066  | 1   | 3Beta_OHsteroid_DH/Estase Reticulon                                                                          | molecular_function 3-beta-hydroxy-delta5-steroid dehydrogenase activity lipid metabolic process steroid biosynthetic process biological_process biosynthetic process oxidoreductase activity oxidoreductase activity, acting on the CH-OH group of donors, NAD or NADP as acceptor oxidation-reduction process cellular_component intracellular cell cytoplasm endoplasmic reticulum organelle nucleotide binding membrane sterol-4-alpha-carboxylate 3-dehydrogenase (decarboxylating) activity |

| Gene          | log2 (fold change) | log2 (count per million) | P-value     | FDR | Interpro                                                            | GO                                                                                                                                                                                                                                                                                                                                                                                                        |
|---------------|--------------------|--------------------------|-------------|-----|---------------------------------------------------------------------|-----------------------------------------------------------------------------------------------------------------------------------------------------------------------------------------------------------------------------------------------------------------------------------------------------------------------------------------------------------------------------------------------------------|
| GRMZM2G349062 | -0.686163655       | 3.050684368              | 0.013192072 | 1   | PaO Rieske_2Fe-2S                                                   | molecular_function cellular_component intracellular cell cytoplasm biological_process chloroplast plastid chloroplast envelope chlorophyllide a oxygenase [overall] activity oxidoreductase activity ion binding organelle metal ion binding iron-sulfur cluster binding 2 iron, 2 sulfur cluster binding oxidation-reduction process                                                                     |
| GRMZM2G542170 | -1.626652114       | 1.261673984              | 0.013242416 | 1   | Not Annotated                                                       | Not Annotated                                                                                                                                                                                                                                                                                                                                                                                             |
| GRMZM2G081380 | -0.623533615       | 4.19158706               | 0.013453858 | 1   | CH-domain Actinin_actin-bd_CS                                       | molecular_function actin binding protein binding cytoskeletal protein binding                                                                                                                                                                                                                                                                                                                             |
| GRMZM2G074466 | -0.585822488       | 5.807779841              | 0.013497834 | 1   | WD40_repeat WD40_repeat_dom WD40_repeat_CS G-protein_beta_WD-40_rep | molecular_function protein binding                                                                                                                                                                                                                                                                                                                                                                        |
| GRMZM2G003679 | 6.214150217        | -1.732270514             | 0.013519394 | 1   | Not Annotated                                                       | Not Annotated                                                                                                                                                                                                                                                                                                                                                                                             |
| GRMZM2G032528 | -1.022968273       | 1.66139278               | 0.013568815 | 1   | Not Annotated                                                       | Not Annotated                                                                                                                                                                                                                                                                                                                                                                                             |
| GRMZM2G110897 | -0.585334797       | 3.181051278              | 0.013583497 | 1   | CASTOR/POLLUX/SYM8                                                  | nucleotide binding molecular_function                                                                                                                                                                                                                                                                                                                                                                     |
| GRMZM2G126827 | -7.297201094       | -0.16821147              | 0.013585083 | 1   | Transcript_factor_SBP-box                                           | molecular_function DNA binding cellular_component intracellular cell nucleus organelle                                                                                                                                                                                                                                                                                                                    |
| GRMZM2G068177 | 0.693340104        | 1.744068999              | 0.013737383 | 1   | Znf_DHHC_palmitoyltransferase                                       | molecular_function zinc ion binding ion binding metal ion binding                                                                                                                                                                                                                                                                                                                                         |
| GRMZM2G325008 | -0.68917524        | 2.770889097              | 0.013815406 | 1   | Pept_M24_structural-domain Glyco_hydro_17 X8 Glycoside_hydrolase_SF | molecular_function catalytic activity hydrolase activity, hydrolyzing O-glycosyl compounds carbohydrate metabolic process biological_process metabolic process cellular process hydrolase activity hydrolase activity, acting on glycosyl bonds                                                                                                                                                           |
| GRMZM2G129954 | -0.599570696       | 3.454397033              | 0.013843586 | 1   | Sig_transdc_resp-reg_receiver CheY-like_superfamily                 | phosphorelay response regulator activity phosphorelay signal transduction system molecular_function signal transducer activity cellular_component intracellular cell nucleus cytoplasm regulation of transcription, DNA-templated signal transduction circadian rhythm biological_process plastid response to cytokinin cytokinin-activated signaling pathway intracellular signal transduction organelle |
| GRMZM2G062654 | -1.854824233       | 0.527790416              | 0.013953283 | 1   | Guanylyl_cyclase                                                    | Not Annotated                                                                                                                                                                                                                                                                                                                                                                                             |
| GRMZM2G071589 | -0.839919095       | 5.449091286              | 0.014003547 | 1   | RRM_dom CC1_SF                                                      | nucleotide binding molecular_function nucleic acid binding RNA binding cellular_component intracellular cell nucleus mRNA processing biological_process cellular nitrogen compound metabolic process organelle                                                                                                                                                                                            |
| GRMZM2G065899 | -1.413557311       | 0.856965521              | 0.014082975 | 1   | EF_hand_dom EF_Hand_1_Ca_BS                                         | molecular_function calcium ion binding ion binding                                                                                                                                                                                                                                                                                                                                                        |

| Gene             | log2 (fold change) | log2 (count per million) | P-value     | FDR | Interpro                                                                                                                                                                                                                                                                                           | GO                                                                                                                                                                                                                                                                                                                                                                                                                                                                                                                                                                                                                                                                                                                                                |
|------------------|--------------------|--------------------------|-------------|-----|----------------------------------------------------------------------------------------------------------------------------------------------------------------------------------------------------------------------------------------------------------------------------------------------------|---------------------------------------------------------------------------------------------------------------------------------------------------------------------------------------------------------------------------------------------------------------------------------------------------------------------------------------------------------------------------------------------------------------------------------------------------------------------------------------------------------------------------------------------------------------------------------------------------------------------------------------------------------------------------------------------------------------------------------------------------|
| GRMZM2G568636    | 3.058891149        | -1.117119388             | 0.014170201 | 1   | MOCF_Oxrdtse_dimer NADH-Cyt_B5_reductase Flavoprot_Pyr_Nucl_cyt_Rdtase OxRdtase_FAD/NAD-bd Cyt_B5-like_heme/steroid-bd OxRdtase_Mopterin-bd_dom OxRdtase_FAD-bd_dom Mopterin_OxRdtase_euk Nitr_rd_NADH lg_E-set Fd_Rdtase_FAD-bd Riboflavin_synthase-like_bbrl Cyt_B5_heme-BS OxRdtase_Mopterin_BS | molecular_function iron ion binding cellular_component intracellular cell cytoplasm vacuole plasma membrane nitric oxide biosynthetic process biological_process nitrate reductase activity electron carrier activity biosynthetic process response to light stimulus response to symbiotic fungus nitrate reductase (NADH) activity oxidoreductase activity heme binding molybdenum ion binding cellular nitrogen compound metabolic process nitrate assimilation ion binding organelle molybdopterin cofactor binding oxidoreductase activity, acting on other nitrogenous compounds as donors, with NAD or NADP as acceptor metal ion binding flavin adenine dinucleotide binding oxidation-reduction process nitrogen cycle metabolic process |
| AC215201.3_FG008 | 1.098480556        | 1.272657426              | 0.014226016 | 1   | bHLH_dom                                                                                                                                                                                                                                                                                           | molecular_function DNA binding cellular_component intracellular cell cytoplasm mitochondrion organelle protein dimerization activity                                                                                                                                                                                                                                                                                                                                                                                                                                                                                                                                                                                                              |
| GRMZM2G126873    | -0.683002346       | 3.650767445              | 0.014260485 | 1   | Vps16_C                                                                                                                                                                                                                                                                                            | cellular_component intracellular cell cytoplasm transport intracellular protein transport biological_process plant-type vacuole membrane                                                                                                                                                                                                                                                                                                                                                                                                                                                                                                                                                                                                          |
| AC197150.3_FG003 | -6.020883491       | -1.607618723             | 0.014277646 | 1   | K_chnl_volt-dep_EAG/ELK/ERG cNMP-bd_dom IQ_motif_EF-hand-BS Ion_trans_dom cNMP-bd-like                                                                                                                                                                                                             | molecular_function ion channel activity protein binding cellular_component transport ion transport biological_process membrane transmembrane transporter activity response to cadmium ion transmembrane transport                                                                                                                                                                                                                                                                                                                                                                                                                                                                                                                                 |
| GRMZM2G162840    | -0.656548844       | 2.338895297              | 0.014373962 | 1   | Myb-like_dom                                                                                                                                                                                                                                                                                       | molecular_function DNA binding                                                                                                                                                                                                                                                                                                                                                                                                                                                                                                                                                                                                                                                                                                                    |
| GRMZM2G445958    | -0.35076555        | 5.216488192              | 0.014383903 | 1   | NA-bd_OB-fold RPA32 RPA_C                                                                                                                                                                                                                                                                          | Not Annotated                                                                                                                                                                                                                                                                                                                                                                                                                                                                                                                                                                                                                                                                                                                                     |
| AC233910.1_FG001 | -1.61772991        | 0.298186299              | 0.014425942 | 1   | Mitochondrial_sb/sol_carrier Mt_carrier_dom                                                                                                                                                                                                                                                        | response to salt stress                                                                                                                                                                                                                                                                                                                                                                                                                                                                                                                                                                                                                                                                                                                           |
| GRMZM2G092008    | -1.42171831        | -0.238866023             | 0.014471987 | 1   | Phosphatidylethanolamine-bd_CS PtdEtn-bd_prot_PEBP                                                                                                                                                                                                                                                 | reproduction molecular_function cellular_component intracellular cell cytoplasm vacuole plasma membrane protein targeting protein targeting to vacuole transport vacuolar transport biological_process lipid binding phosphatidylethanolamine binding response to sucrose negative regulation of flower development inflorescence development vesicle organelle regulation of timing of transition from vegetative to reproductive phase anatomical structure development negative regulation of cell aging                                                                                                                                                                                                                                       |
| GRMZM2G117360    | -0.85200884        | 3.388073636              | 0.014520095 | 1   | Not Annotated                                                                                                                                                                                                                                                                                      | Not Annotated                                                                                                                                                                                                                                                                                                                                                                                                                                                                                                                                                                                                                                                                                                                                     |
| GRMZM2G013196    | -0.769019538       | 2.669367372              | 0.014570018 | 1   | Not Annotated                                                                                                                                                                                                                                                                                      | Not Annotated                                                                                                                                                                                                                                                                                                                                                                                                                                                                                                                                                                                                                                                                                                                                     |
| GRMZM5G852378    | -1.393065149       | 0.445439462              | 0.014628723 | 1   | C2_dom PRibTrfase_C                                                                                                                                                                                                                                                                                | molecular_function protein binding plasma membrane plasmodesma organ development                                                                                                                                                                                                                                                                                                                                                                                                                                                                                                                                                                                                                                                                  |
| GRMZM5G819204    | -0.517942209       | 3.16761243               | 0.014637223 | 1   | Not Annotated                                                                                                                                                                                                                                                                                      | Not Annotated                                                                                                                                                                                                                                                                                                                                                                                                                                                                                                                                                                                                                                                                                                                                     |
| GRMZM2G048567    | -0.911456289       | 1.756295191              | 0.01465848  | 1   | Not Annotated                                                                                                                                                                                                                                                                                      | Not Annotated                                                                                                                                                                                                                                                                                                                                                                                                                                                                                                                                                                                                                                                                                                                                     |



| Gene          | log2 (fold change) | log2 (count per million) | P-value     | FDR | Interpro                                                                                                 | GO                                                                                                                                                                                                                                                                                                                                                 |
|---------------|--------------------|--------------------------|-------------|-----|----------------------------------------------------------------------------------------------------------|----------------------------------------------------------------------------------------------------------------------------------------------------------------------------------------------------------------------------------------------------------------------------------------------------------------------------------------------------|
| GRMZM2G000264 | -0.655868647       | 5.416628987              | 0.014748652 |     | Cation_transp_P_typ_1<br>ATPase HAD-like_dom                                                             | molecular_function cellular_component cell plasma membrane transport cation transport biological_process integral component of membrane ATPase activity cation-transporting ATPase activity transmembrane transporter activity                                                                                                                     |
| GRMZM2G124377 | -0.56817299        | 3.712336751              | 0.01482004  |     | Phosphodiesterase/P_Trfase<br> Alkaline_phosphatase                                                      | molecular_function catalytic activity endoplasmic reticulum biological_process metabolic process                                                                                                                                                                                                                                                   |
| GRMZM2G092648 | -0.623160691       | 3.003925074              | 0.014833751 |     | 1<br>DUF789                                                                                              | Not Annotated                                                                                                                                                                                                                                                                                                                                      |
| GRMZM2G410134 | -0.930121604       | 9.152075285              | 0.014907205 |     | 1<br>Bifunc_inhib/LTP/seed_store                                                                         | cellular_component intracellular cell cytoplasm transport biological_process cytoplasmic membrane-bounded vesicle secretion by cell organelle                                                                                                                                                                                                      |
| GRMZM2G039610 | -0.526396834       | 5.039401398              | 0.014920185 |     | 1<br>Not Annotated                                                                                       | cellular_component intracellular cell cytoplasm plasma membrane chloroplast plastid organelle                                                                                                                                                                                                                                                      |
| GRMZM2G059964 | -3.37409334        | -1.635432645             | 0.014954761 |     | 1<br>Bifunc_inhib/LTP/seed_store                                                                         | Not Annotated                                                                                                                                                                                                                                                                                                                                      |
| GRMZM2G180951 | -0.856948352       | 2.745657083              | 0.014996813 |     | 1<br>Glyco_trans_48                                                                                      | 1,3-beta-D-glucan synthase complex molecular_function 1,3-beta-D-glucan synthase activity cellular_component cell plasma membrane carbohydrate metabolic process (1-&gt;3)-beta-D-glucan biosynthetic process biological_process biosynthetic process membrane transferase activity, transferring glycosyl groups protein complex                  |
| GRMZM5G826767 | 1.017495555        | 2.556555186              | 0.015001247 |     | 1<br>LEA-14                                                                                              | Not Annotated                                                                                                                                                                                                                                                                                                                                      |
| GRMZM2G062042 | -0.92318188        | 1.965031347              | 0.015015036 |     | 1<br>Mlo Clathrin_H-chain/VPS_repeat AR M-type_fold                                                      | molecular_function binding cellular_component transport intracellular protein transport biological_process cell death integral component of membrane vesicle-mediated transport                                                                                                                                                                    |
| GRMZM2G017197 | -6.488580144       | -0.373894035             | 0.015022348 |     | 1<br>Pentatricopeptide_repeat                                                                            | Not Annotated                                                                                                                                                                                                                                                                                                                                      |
| GRMZM2G160178 | -1.892042452       | 1.079392575              | 0.015084952 |     | 1<br>Not Annotated                                                                                       | Not Annotated                                                                                                                                                                                                                                                                                                                                      |
| GRMZM2G107540 | -0.452789184       | 4.98616403               | 0.01512318  |     | 1<br>Histone_H2A Histone_core_D Histone-fold                                                             | nucleosome molecular_function DNA binding cellular_component intracellular cell nucleus chromosome DNA metabolic process nucleosome assembly biological_process cellular component assembly cellular nitrogen compound metabolic process organelle protein heterodimerization activity chromosome organization macromolecular complex assembly     |
| GRMZM5G813909 | -0.333830422       | 5.665395352              | 0.015193193 |     | 1<br>Peptidase_M48                                                                                       | molecular_function endopeptidase activity metalloendopeptidase activity cellular_component intracellular cell cytoplasm vacuole endoplasmic reticulum proteolysis biological_process peptidase activity metallopeptidase activity membrane hydrolase activity organelle protein maturation CAAX-box protein processing CAAX-box protein maturation |
| GRMZM2G357834 | -5.762285887       | -1.661253474             | 0.015196594 |     | 1<br>Wound-induced_Wun1                                                                                  | Not Annotated                                                                                                                                                                                                                                                                                                                                      |
| GRMZM2G133959 | -0.897695052       | 3.141808352              | 0.015254548 |     | 1<br>DUF2305                                                                                             | Not Annotated                                                                                                                                                                                                                                                                                                                                      |
| GRMZM2G389948 | -1.34998124        | 0.388350821              | 0.015263996 |     | 1<br>Leu-rich_rpt Prot_kinase_dom Ser/Thr_kinase_AS Kinase-like_dom LRR-contain_N2 Protein_kinase_ATP_BS | molecular_function protein kinase activity protein serine/threonine kinase activity protein binding ATP binding cellular protein modification process protein phosphorylation biological_process kinase activity phosphorylation transferase activity, transferring phosphorus-containing groups                                                   |
| GRMZM2G147667 | -0.760608338       | 4.011411699              | 0.015343225 |     | 1<br>Peptidase_C19/C67 Pept_C19ubi-hydrolase_C_CS                                                        | molecular_function ubiquitin thioesterase activity proteolysis ubiquitin-dependent protein catabolic process biological_process peptidase activity cysteine-type peptidase activity catabolic process hydrolase activity                                                                                                                           |

| Gene          | log2 (fold change) | log2 (count per million) | P-value     | FDR | Interpro                                                                              | GO                                                                                                                                                                                                                                                                                                                                                                                                                                                                 |
|---------------|--------------------|--------------------------|-------------|-----|---------------------------------------------------------------------------------------|--------------------------------------------------------------------------------------------------------------------------------------------------------------------------------------------------------------------------------------------------------------------------------------------------------------------------------------------------------------------------------------------------------------------------------------------------------------------|
| GRMZM2G090736 | 0.990493577        | 4.392488477              | 0.015370985 | 1   | Monothiol_GRX-rel Glutaredoxin Thioredoxin-like_fold Thioredoxin_domain               | molecular_function biological_process electron carrier activity protein disulfide oxidoreductase activity oxidoreductase activity homeostatic process cell redox homeostasis                                                                                                                                                                                                                                                                                       |
| GRMZM2G169405 | -1.532475619       | 0.15218651               | 0.0154383   | 1   | Not Annotated                                                                         | cellular_component intracellular cell cytoplasm chloroplast chloroplast thylakoid membrane plastid chloroplast stroma thylakoid organelle                                                                                                                                                                                                                                                                                                                          |
| GRMZM5G863846 | -0.605088549       | 3.121101979              | 0.015466593 | 1   | Not Annotated                                                                         | Not Annotated                                                                                                                                                                                                                                                                                                                                                                                                                                                      |
| GRMZM2G017847 | -0.678237371       | 3.630291999              | 0.015487489 | 1   | Actin_CS Actin-related                                                                | molecular_function ATP binding                                                                                                                                                                                                                                                                                                                                                                                                                                     |
| GRMZM2G172011 | -0.645027823       | 4.35706164               | 0.015519962 | 1   | RRM_dom                                                                               | nucleotide binding molecular_function nucleic acid binding                                                                                                                                                                                                                                                                                                                                                                                                         |
| GRMZM2G059129 | -0.559348313       | 3.245868861              | 0.01557166  | 1   | GlyceroP-diester-Pdiesterase PLC-like_Pdiesterase_TIM-brl                             | molecular_function carbohydrate metabolic process glycerol metabolic process lipid metabolic process phosphoric diester hydrolase activity biological_process glycerophosphodiester phosphodiesterase activity small molecule metabolic process                                                                                                                                                                                                                    |
| GRMZM2G149923 | -0.558437557       | 5.848561008              | 0.015587827 | 1   | EF_hand_dom EF-hand_dom_pair EF_Hand_1_Ca_BS                                          | molecular_function calcium ion binding cellular_component intracellular cell nucleus cytoplasm cytosol response to stress signal transduction biological_process response to water deprivation response to salt stress response to abscisic acid calcium-mediated signaling ion binding organelle                                                                                                                                                                  |
| GRMZM2G353548 | -0.631918542       | 4.510087279              | 0.015597396 | 1   | WD40_repeat Quinon protein_ADH-like_supfam WD40_repeat_dom WD40_repeat_CS             | molecular_function protein binding                                                                                                                                                                                                                                                                                                                                                                                                                                 |
| GRMZM2G119079 | -0.851840107       | 2.923358049              | 0.015648671 | 1   | Tyr/Dual-sp_Pase Dual-sp_phosphatase_catdom Tyr_Pase_AS Dual-sp_phosphatase_subgr_cat | molecular_function protein tyrosine phosphatase activity cellular protein modification process protein dephosphorylation protein tyrosine/serine/threonine phosphatase activity biological_process dephosphorylation hydrolase activity phosphatase activity peptidyl-tyrosine dephosphorylation                                                                                                                                                                   |
| GRMZM2G469551 | -0.652585257       | 4.108699132              | 0.015685415 | 1   | START_lipid_bd_dom Homeobox_dom Homeodomain-like MEKHLA                               | nucleic acid binding transcription factor activity molecular_function DNA binding sequence-specific DNA binding transcription factor activity regulation of transcription, DNA-templated biological_process determination of bilateral symmetry polarity specification of adaxial/abaxial axis radial pattern formation meristem initiation xylem and phloem pattern formation cell differentiation sequence-specific DNA binding anatomical structure development |
| GRMZM2G075828 | -1.025874429       | 1.860243113              | 0.015771141 | 1   | MATE                                                                                  | molecular_function cellular_component transport drug transmembrane transport biological_process drug transmembrane transporter activity antiporter activity membrane transmembrane transporter activity transmembrane transport                                                                                                                                                                                                                                    |
| GRMZM2G399844 | -0.613371111       | 4.458679292              | 0.015812929 | 1   | Not Annotated                                                                         | Not Annotated                                                                                                                                                                                                                                                                                                                                                                                                                                                      |
| GRMZM2G118637 | 1.070712687        | 7.193787198              | 0.015840675 | 1   | Ubiquitin_dom Ubiquitin_CS Ubiquitin                                                  | molecular_function protein binding vacuole response to UV-B                                                                                                                                                                                                                                                                                                                                                                                                        |
| GRMZM2G013761 | -1.014056466       | 3.568199424              | 0.015974635 | 1   | GUCT                                                                                  | molecular_function RNA binding helicase activity ATP binding cellular_component intracellular cell nucleus organelle                                                                                                                                                                                                                                                                                                                                               |
| GRMZM5G873635 | -1.075467001       | 2.117966224              | 0.016072957 | 1   | Not Annotated                                                                         | Not Annotated                                                                                                                                                                                                                                                                                                                                                                                                                                                      |
| GRMZM2G149175 | -0.662392811       | 3.422562478              | 0.016087841 | 1   | Not Annotated                                                                         | Not Annotated                                                                                                                                                                                                                                                                                                                                                                                                                                                      |
| GRMZM2G078124 | -1.250878742       | 0.83480789               | 0.016124586 | 1   | Not Annotated                                                                         | Not Annotated                                                                                                                                                                                                                                                                                                                                                                                                                                                      |

| Gene          | log2 (fold change) | log2 (count per million) | P-value     | FDR | Interpro                                                | GO                                                                                                                                                                                                                                                                                                                                                                                                                                                                                                                                                                                                                                                    |
|---------------|--------------------|--------------------------|-------------|-----|---------------------------------------------------------|-------------------------------------------------------------------------------------------------------------------------------------------------------------------------------------------------------------------------------------------------------------------------------------------------------------------------------------------------------------------------------------------------------------------------------------------------------------------------------------------------------------------------------------------------------------------------------------------------------------------------------------------------------|
| GRMZM2G069098 | 1.183517605        | -0.001651745             | 0.016142092 | 1   | MATE                                                    | molecular_function cellular_component intracellular cell cytoplasm vacuole plasma membrane transport drug transmembrane transporter activity antipporter activity membrane transmembrane transporter activity organelle transmembrane transport                                                                                                                                                                                                                                                                                                                                                                                                       |
| GRMZM2G870572 | -0.457491887       | 4.439888483              | 0.016145965 | 1   | BSD                                                     | Not Annotated                                                                                                                                                                                                                                                                                                                                                                                                                                                                                                                                                                                                                                         |
| GRMZM2G405064 | -0.924924619       | 1.282336637              | 0.016233086 | 1   | Asc_peroxidase DUF632 Polyketide_cyclase/dehydratase    | Not Annotated                                                                                                                                                                                                                                                                                                                                                                                                                                                                                                                                                                                                                                         |
| GRMZM2G095655 | -2.289708685       | -1.171935032             | 0.016236681 | 1   | Universal_stress_UspA UspA                              | cellular_component cell plasma membrane response to stress biological_process response to cold                                                                                                                                                                                                                                                                                                                                                                                                                                                                                                                                                        |
| GRMZM2G475867 | -0.572661101       | 3.885535303              | 0.016293602 | 1   | WD40_repeat Ribosome_control_1                          | molecular_function protein binding                                                                                                                                                                                                                                                                                                                                                                                                                                                                                                                                                                                                                    |
| GRMZM2G059445 | -0.734930359       | 1.531041383              | 0.016296909 | 1   | Cyt_trans-like                                          | molecular_function catalytic activity biological_process biosynthetic process                                                                                                                                                                                                                                                                                                                                                                                                                                                                                                                                                                         |
| GRMZM2G152194 | -0.647640139       | 4.118924274              | 0.016503197 | 1   | GPI_mannosylTrfase                                      | alpha-1,6-mannosyltransferase activity molecular_function cellular_component intracellular cell cytoplasm endoplasmic reticulum carbohydrate metabolic process translation cellular protein modification process protein N-linked glycosylation GPI anchor biosynthetic process lipid metabolic process biological_process catabolic process biosynthetic process transferase activity, transferring glycosyl groups ER-associated ubiquitin-dependent protein catabolic process intrinsic component of endoplasmic reticulum membrane organelle                                                                                                      |
| GRMZM2G464782 | -0.798233907       | 4.367716506              | 0.016533246 | 1   | Not Annotated                                           | Not Annotated                                                                                                                                                                                                                                                                                                                                                                                                                                                                                                                                                                                                                                         |
| GRMZM2G134385 | -0.44835939        | 5.413164835              | 0.016539652 | 1   | BP28_C_dom ARM-type_fold                                | molecular_function binding                                                                                                                                                                                                                                                                                                                                                                                                                                                                                                                                                                                                                            |
| GRMZM2G701310 | -0.940103213       | 4.778296407              | 0.016606365 | 1   | Not Annotated                                           | Not Annotated                                                                                                                                                                                                                                                                                                                                                                                                                                                                                                                                                                                                                                         |
| GRMZM2G178102 | -0.55072616        | 2.815903883              | 0.01664256  | 1   | START_lipid-bd_dom Homeobox_dom Homeodomain-like MEKHLA | reproduction nucleic acid binding transcription factor activity molecular_function DNA binding sequence-specific DNA binding transcription factor activity cellular_component intracellular cell nucleus regulation of transcription, DNA-templated biological_process embryo development determination of bilateral symmetry embryonic pattern specification adaxial/abaxial axis specification polarity specification of adaxial/abaxial axis adaxial/abaxial pattern specification meristem initiation primary shoot apical meristem specification organelle sequence-specific DNA binding anatomical structure development integument development |
| GRMZM2G306859 | -0.553472266       | 3.989584304              | 0.016692463 | 1   | Znf_FYVE_PHD Acyl_CoA_acyltransferase                   | Not Annotated                                                                                                                                                                                                                                                                                                                                                                                                                                                                                                                                                                                                                                         |
| GRMZM2G144705 | -1.246702966       | 1.990041594              | 0.016788174 | 1   | HNH_nuc HNN                                             | molecular_function nucleic acid binding nuclease activity endonuclease activity                                                                                                                                                                                                                                                                                                                                                                                                                                                                                                                                                                       |
| GRMZM2G043183 | -1.110029694       | 1.068905323              | 0.016854445 | 1   | Vps52                                                   | Not Annotated                                                                                                                                                                                                                                                                                                                                                                                                                                                                                                                                                                                                                                         |
| GRMZM5G863784 | -0.582535368       | 3.097579649              | 0.016866309 | 1   | Pept_M3A_M3B                                            | molecular_function metalloendopeptidase activity proteolysis biological_process peptidase activity metallopeptidase activity hydrolase activity ion binding metal ion binding                                                                                                                                                                                                                                                                                                                                                                                                                                                                         |
| GRMZM2G115772 | -0.69283879        | 2.8673879                | 0.017005511 | 1   | Not Annotated                                           | Not Annotated                                                                                                                                                                                                                                                                                                                                                                                                                                                                                                                                                                                                                                         |

| Gene          | log2 (fold change) | log2 (count per million) | P-value     | FDR | Interpro                                                                                            | GO                                                                                                                                                                                                                                                                                                                                                                                                                                                                                                                                          |
|---------------|--------------------|--------------------------|-------------|-----|-----------------------------------------------------------------------------------------------------|---------------------------------------------------------------------------------------------------------------------------------------------------------------------------------------------------------------------------------------------------------------------------------------------------------------------------------------------------------------------------------------------------------------------------------------------------------------------------------------------------------------------------------------------|
| GRMZM2G012685 | -2.96220322        | -1.172670243             | 0.017175215 | 1   | Leu-rich_rpt Prot_kinase_dom Ser/Thr_kinase_AS Kinase-like_dom LRR-contain_N2 Protein_kinase_ATP_BS | molecular_function protein kinase activity protein serine/threonine kinase activity protein binding ATP binding cellular protein modification process protein phosphorylation biological_process kinase activity phosphorylation transferase activity, transferring phosphorus-containing groups                                                                                                                                                                                                                                            |
| GRMZM2G095868 | -0.589646774       | 2.739546832              | 0.017183049 | 1   | Rab-GTPase-TBC_dom                                                                                  | molecular_function Rab GTPase activator activity cellular_component intracellular cell biological_process enzyme regulator activity regulation of Rab GTPase activity positive regulation of Rab GTPase activity                                                                                                                                                                                                                                                                                                                            |
| GRMZM2G340359 | -0.442101593       | 4.437550796              | 0.017192378 | 1   | Pleckstrin_homology RhoGAP_dom Rho_GTPase_activation_prot MIP1_Leuzipper                            | molecular_function protein binding phospholipid binding cellular_component intracellular cell signal transduction biological_process lipid binding                                                                                                                                                                                                                                                                                                                                                                                          |
| GRMZM2G063316 | -0.542251049       | 3.889733184              | 0.017240634 | 1   | SET_dom Rubisco_LS MT_subst-bd                                                                      | molecular_function protein binding cellular_component intracellular cell cytoplasm chloroplast plastid organelle                                                                                                                                                                                                                                                                                                                                                                                                                            |
| GRMZM2G155253 | -2.924691815       | -0.046459015             | 0.017254818 | 1   | Aldolase_I                                                                                          | molecular_function catalytic activity fructose-bisphosphate aldolase activity cellular_component extracellular region intracellular cell cytoplasm cytosol ribosome carbohydrate metabolic process generation of precursor metabolites and energy glycolysis biological_process catabolic process chloroplast chloroplast thylakoid plastid chloroplast stroma thylakoid response to abscisic acid chloroplast envelope plastoglobule membrane lyase activity cytosolic ribosome thylakoid lumen organelle response to cadmium ion apoplast |
| GRMZM2G152189 | 2.339597186        | 1.107860378              | 0.017255108 | 1   | Not Annotated                                                                                       | Not Annotated                                                                                                                                                                                                                                                                                                                                                                                                                                                                                                                               |
| GRMZM2G167243 | -1.172124106       | 1.308506309              | 0.01729633  | 1   | Not Annotated                                                                                       | chloroplast photosynthesis                                                                                                                                                                                                                                                                                                                                                                                                                                                                                                                  |
| GRMZM2G174449 | 3.21266024         | -2.33298895              | 0.017462672 | 1   | DUF247_pln                                                                                          | Not Annotated                                                                                                                                                                                                                                                                                                                                                                                                                                                                                                                               |
| GRMZM2G158240 | -2.429186513       | -0.73912757              | 0.017521783 | 1   | Pectinesterase_cat Pectinesterase_inhib_dom Pectin_lyase_fold/virulence Pectinesterase_AS           | molecular_function enzyme inhibitor activity cellular_component cell wall cell biological_process hydrolase activity enzyme regulator activity external encapsulating structure pectinesterase activity cell wall modification negative regulation of catalytic activity aspartyl esterase activity cell wall organization or biogenesis                                                                                                                                                                                                    |
| GRMZM2G034536 | -0.984257686       | 2.025408497              | 0.017539013 | 1   | Znf_RING-CH                                                                                         | molecular_function zinc ion binding ion binding                                                                                                                                                                                                                                                                                                                                                                                                                                                                                             |
| GRMZM5G801958 | 5.919067406        | -1.852404395             | 0.017598128 | 1   | Not Annotated                                                                                       | Not Annotated                                                                                                                                                                                                                                                                                                                                                                                                                                                                                                                               |
| GRMZM2G168176 | -0.549290056       | 3.066523375              | 0.017670502 | 1   | Anticodon-bd Brix                                                                                   | Not Annotated                                                                                                                                                                                                                                                                                                                                                                                                                                                                                                                               |
| GRMZM2G075008 | -6.748934336       | -0.487109734             | 0.017757786 | 1   | Not Annotated                                                                                       | Not Annotated                                                                                                                                                                                                                                                                                                                                                                                                                                                                                                                               |
| GRMZM2G063369 | -0.448187437       | 5.153721265              | 0.017759558 | 12  | ARM-type_fold HEAT_type_VAC14_Fig4p-bd                                                              | molecular_function binding cellular_component cell vacuolar membrane plasma membrane biological_process kinase activator activity enzyme regulator activity positive regulation of phosphorylation                                                                                                                                                                                                                                                                                                                                          |
| GRMZM2G569390 | -0.52957433        | 2.458778442              | 0.017861007 | 1   | DUF868_pln                                                                                          | Not Annotated                                                                                                                                                                                                                                                                                                                                                                                                                                                                                                                               |
| GRMZM2G123732 | -0.681993819       | 3.945188906              | 0.017887785 | 140 | Uncharacterised_TM-140                                                                              | response to molecule of bacterial origin root morphogenesis                                                                                                                                                                                                                                                                                                                                                                                                                                                                                 |
| GRMZM2G147158 | -0.632450331       | 2.065949164              | 0.017917246 | 1   | Not Annotated                                                                                       | Not Annotated                                                                                                                                                                                                                                                                                                                                                                                                                                                                                                                               |
| GRMZM2G177404 | -2.769402082       | -0.8224568               | 0.018130942 | 1   | 6-PGluconate_DH_C-like                                                                              | biological_process oxidation-reduction process                                                                                                                                                                                                                                                                                                                                                                                                                                                                                              |
| GRMZM2G163247 | -0.491849066       | 4.16398599               | 0.01816914  | 1   | RRM_dom                                                                                             | nucleotide binding molecular_function nucleic acid binding                                                                                                                                                                                                                                                                                                                                                                                                                                                                                  |
| GRMZM2G178247 | -1.961821791       | 0.039156744              | 0.018172402 | 1   | Cyclin_N Cyclin-like Cyclin_C-dom                                                                   | cellular_component intracellular cell nucleus organelle                                                                                                                                                                                                                                                                                                                                                                                                                                                                                     |
| GRMZM2G401700 | -1.185892026       | 0.580359783              | 0.018242847 | 1   | Not Annotated                                                                                       | Not Annotated                                                                                                                                                                                                                                                                                                                                                                                                                                                                                                                               |
| GRMZM2G053790 | -3.625267709       | -0.597326258             | 0.018270124 | 1   | Not Annotated                                                                                       | Not Annotated                                                                                                                                                                                                                                                                                                                                                                                                                                                                                                                               |

| Gene          | log2 (fold change) | log2 (count per million) | P-value     | FDR | Interpro                                                                                                              | GO                                                                                                                                                                                                                                                                                                                                                                                                                                                                                                                                                                                                                                                                                                                                                                                                                           |
|---------------|--------------------|--------------------------|-------------|-----|-----------------------------------------------------------------------------------------------------------------------|------------------------------------------------------------------------------------------------------------------------------------------------------------------------------------------------------------------------------------------------------------------------------------------------------------------------------------------------------------------------------------------------------------------------------------------------------------------------------------------------------------------------------------------------------------------------------------------------------------------------------------------------------------------------------------------------------------------------------------------------------------------------------------------------------------------------------|
| GRMZM5G882378 | -1.03895874        | 1.76804339               | 0.01842534  | 1   | Ribosomal_S11 Ribosomal_S11_CS                                                                                        | molecular_function structural constituent of ribosome structural molecule activity cellular_component intracellular cell cytoplasm ribosome translation biological_process biosynthetic process ribonucleoprotein complex organelle                                                                                                                                                                                                                                                                                                                                                                                                                                                                                                                                                                                          |
| GRMZM2G076034 | 5.805575723        | -2.032165852             | 0.018471749 | 1   | WD40_repeat WD40_repeat_dom G-protein_beta_WD-140_rep                                                                 | molecular_function protein binding                                                                                                                                                                                                                                                                                                                                                                                                                                                                                                                                                                                                                                                                                                                                                                                           |
| GRMZM2G428391 | 0.943936899        | 7.591216809              | 0.018487488 | 1   | Hsp_70_fam Heat_shock_70_CS                                                                                           | nucleotide binding molecular_function ATP binding cell wall mitochondrion vacuolar membrane Golgi apparatus cytosol plasma membrane response to stress biological_process response to temperature stimulus response to heat response to virus response to bacterium response to high light intensity protein ubiquitination ubiquitin protein ligase binding response to hydrogen peroxide response to cadmium ion apoplast                                                                                                                                                                                                                                                                                                                                                                                                  |
| GRMZM2G107395 | -1.041732954       | 1.721726971              | 0.018512349 | 1   | 14-3-3 14-3-3_CS 14-3-3_domain                                                                                        | Not Annotated                                                                                                                                                                                                                                                                                                                                                                                                                                                                                                                                                                                                                                                                                                                                                                                                                |
| GRMZM2G067853 | -0.361586459       | 5.630414154              | 0.018514343 | 1   | Cation_transp_P_typ_ATPase ATPase_P_typ_transduc_dom_A ATPase_P_typ_P_site HAD-like_dom Cation_transp_P_typ_ATPase_IB | nucleotide binding molecular_function calcium-transporting ATPase activity cellular_component intracellular cell cytoplasm ATP catabolic process transport cation transport calcium ion transport cellular copper ion homeostasis biological_process catabolic process chloroplast plastid response to toxic substance response to light intensity chloroplast envelope cadmium-transporting ATPase activity zinc transporting ATPase activity integral component of membrane ATPase activity cation-transporting ATPase activity transmembrane transporter activity cellular nitrogen compound metabolic process nucleobase-containing compound catabolic process homeostatic process ion binding organelle small molecule metabolic process metal ion binding zinc ion homeostasis ATP binding membrane hydrolase activity |
| GRMZM2G135120 | -0.57487194        | 3.489927366              | 0.018517478 | 1   | Not Annotated                                                                                                         | Not Annotated                                                                                                                                                                                                                                                                                                                                                                                                                                                                                                                                                                                                                                                                                                                                                                                                                |
| GRMZM5G869572 | -0.995994305       | 3.177069654              | 0.018518088 | 1   | ARM-type_fold                                                                                                         | molecular_function binding                                                                                                                                                                                                                                                                                                                                                                                                                                                                                                                                                                                                                                                                                                                                                                                                   |
| GRMZM2G153150 | -0.586627631       | 3.353119796              | 0.018533088 | 1   | RB_A RB_B Cyclin-like RB_N                                                                                            | cellular_component intracellular cell nucleus transcription, DNA-templated regulation of transcription, DNA-templated cell cycle biological_process biosynthetic process cellular nitrogen compound metabolic process organelle regulation of cell cycle                                                                                                                                                                                                                                                                                                                                                                                                                                                                                                                                                                     |
| GRMZM2G125441 | -0.869717785       | 3.058262963              | 0.018533536 | 1   | Not Annotated                                                                                                         | Not Annotated                                                                                                                                                                                                                                                                                                                                                                                                                                                                                                                                                                                                                                                                                                                                                                                                                |
| GRMZM2G077307 | -0.5824315         | 5.150449679              | 0.018724759 | 1   | Znf_RING Znf_CHY Znf_CTCHY                                                                                            | molecular_function protein binding zinc ion binding ion binding metal ion binding                                                                                                                                                                                                                                                                                                                                                                                                                                                                                                                                                                                                                                                                                                                                            |
| GRMZM2G126808 | -0.96647721        | 2.047648852              | 0.018739999 | 1   | Leu_zip_homeo Homeobox_dom Homeodomain-like Homeobox_CS                                                               | nucleic acid binding transcription factor activity molecular_function DNA binding sequence-specific DNA binding transcription factor activity cellular_component intracellular cell nucleus regulation of transcription, DNA-templated biological_process response to cytokinin organelle sequence-specific DNA binding transcription, DNA-templated biosynthetic process cellular nitrogen compound metabolic process                                                                                                                                                                                                                                                                                                                                                                                                       |
| GRMZM2G451357 | -0.426364501       | 4.710306641              | 0.01879636  | 1   | Peptidase_C19/C67 Pept_C19ubihydrolase_C_CS                                                                           | molecular_function ubiquitin thiolesterase activity ubiquitin-dependent protein catabolic process biological_process catabolic process                                                                                                                                                                                                                                                                                                                                                                                                                                                                                                                                                                                                                                                                                       |
| GRMZM2G462883 | 1.96554443         | -0.170508426             | 0.018826141 | 1   | AB_hydrolase_3                                                                                                        | molecular_function biological_process metabolic process hydrolase activity                                                                                                                                                                                                                                                                                                                                                                                                                                                                                                                                                                                                                                                                                                                                                   |

| Gene             | log2 (fold change) | log2 (count per million) | P-value     | FDR | Interpro                                                                                                                          | GO                                                                                                                                                                                                                                                                                                                                                                                                                                                                                                                                                                                                                             |
|------------------|--------------------|--------------------------|-------------|-----|-----------------------------------------------------------------------------------------------------------------------------------|--------------------------------------------------------------------------------------------------------------------------------------------------------------------------------------------------------------------------------------------------------------------------------------------------------------------------------------------------------------------------------------------------------------------------------------------------------------------------------------------------------------------------------------------------------------------------------------------------------------------------------|
|                  |                    |                          |             |     | Small_GTP-bd_dom Transl_elong_EFTu/EF1A_2 EF_GTP-bd_dom EFG_V Transl_elong_EFG/EF2_IV Transl_B-barrel EFG_III-V Ribosomal_S5_D2-1 | nucleotide binding molecular_function RNA binding translation elongation factor activity GTPase activity copper ion binding GTP binding cellular_component intracellular cell nucleus nucleolus cytoplasm cytosol plasma membrane GTP catabolic process translation translational elongation response to stress translation factor activity, nucleic acid binding biological_process catabolic process biosynthetic process response to cold chloroplast plastid membrane cellular nitrogen compound metabolic process nucleobase-containing compound catabolic process ion binding organelle small molecule metabolic process |
| GRMZM2G095851    | -3.795187125       | 4.711031634              | 0.01882956  |     | 1 typ_fold                                                                                                                        |                                                                                                                                                                                                                                                                                                                                                                                                                                                                                                                                                                                                                                |
| GRMZM2G125529    | -1.214963223       | 1.679888675              | 0.018909951 |     | 1 RRM_dom                                                                                                                         | nucleotide binding molecular_function nucleic acid binding                                                                                                                                                                                                                                                                                                                                                                                                                                                                                                                                                                     |
|                  |                    |                          |             |     |                                                                                                                                   | molecular_function DNA binding DNA-templated transcription, initiation biological_process biosynthetic process cellular nitrogen compound metabolic process                                                                                                                                                                                                                                                                                                                                                                                                                                                                    |
| GRMZM2G466938    | -1.838942014       | -0.486292508             | 0.018967889 |     | 1 TBP                                                                                                                             |                                                                                                                                                                                                                                                                                                                                                                                                                                                                                                                                                                                                                                |
|                  |                    |                          |             |     |                                                                                                                                   | ARM-                                                                                                                                                                                                                                                                                                                                                                                                                                                                                                                                                                                                                           |
| GRMZM2G319169    | -0.670007436       | 3.713111938              | 0.018970672 |     | 1 type_fold DUF3730                                                                                                               | molecular_function binding                                                                                                                                                                                                                                                                                                                                                                                                                                                                                                                                                                                                     |
|                  |                    |                          |             |     |                                                                                                                                   | cellular_component intracellular cell cytoplasm transport intracellular protein transport ER to Golgi vesicle-mediated                                                                                                                                                                                                                                                                                                                                                                                                                                                                                                         |
| GRMZM2G056695    | -0.478198406       | 4.816760266              | 0.01897297  |     | 1 Sec23/24_helical_dom Gelsolin_dom Sec23_24_beta_S                                                                               | transport biological_process protein transport cytoplasmic membrane-bounded vesicle vesicle-mediated transport COPII vesicle coat organelle protein complex                                                                                                                                                                                                                                                                                                                                                                                                                                                                    |
| AC233936.1_FG003 | -1.27374877        | 1.211294173              | 0.018979038 |     | 1 WD40_repeat WD40_repeat_CS                                                                                                      | molecular_function protein binding                                                                                                                                                                                                                                                                                                                                                                                                                                                                                                                                                                                             |
|                  |                    |                          |             |     |                                                                                                                                   | cellular_component intracellular cell nucleus DNA metabolic process DNA repair regulation of DNA repair response to stress cell cycle biological_process cellular nitrogen compound metabolic process organelle                                                                                                                                                                                                                                                                                                                                                                                                                |
| GRMZM2G051138    | -0.776511686       | 1.619874382              | 0.01902979  |     | 1 Not Annotated                                                                                                                   |                                                                                                                                                                                                                                                                                                                                                                                                                                                                                                                                                                                                                                |
|                  |                    |                          |             |     |                                                                                                                                   | Pentatricopeptide_rep                                                                                                                                                                                                                                                                                                                                                                                                                                                                                                                                                                                                          |
| GRMZM2G022787    | -0.699654934       | 2.27739052               | 0.01903814  |     | 1 eat Znf_CCHC                                                                                                                    | molecular_function nucleic acid binding zinc ion binding ion binding                                                                                                                                                                                                                                                                                                                                                                                                                                                                                                                                                           |
| GRMZM2G448651    | -0.981888204       | 1.942489322              | 0.019155375 |     | 1 Not Annotated                                                                                                                   | Not Annotated                                                                                                                                                                                                                                                                                                                                                                                                                                                                                                                                                                                                                  |
|                  |                    |                          |             |     |                                                                                                                                   | F-box_dom Tubby_C Tubby_C_CS Tubby_C-like                                                                                                                                                                                                                                                                                                                                                                                                                                                                                                                                                                                      |
| GRMZM2G129288    | -0.527616187       | 4.467566209              | 0.019188308 |     | 1 like                                                                                                                            | molecular_function protein binding cytosol plasma membrane plastid response to fungus                                                                                                                                                                                                                                                                                                                                                                                                                                                                                                                                          |
| GRMZM2G144674    | -1.085106913       | 0.639535853              | 0.019198688 |     | 1 Not Annotated                                                                                                                   | Not Annotated                                                                                                                                                                                                                                                                                                                                                                                                                                                                                                                                                                                                                  |
|                  |                    |                          |             |     |                                                                                                                                   | Pentatricopeptide_rep                                                                                                                                                                                                                                                                                                                                                                                                                                                                                                                                                                                                          |
| GRMZM2G016866    | 1.202948054        | 2.881066027              | 0.019223872 |     | 1 eat                                                                                                                             | Not Annotated                                                                                                                                                                                                                                                                                                                                                                                                                                                                                                                                                                                                                  |
| GRMZM2G515667    | -2.607625772       | -1.049234353             | 0.019305243 |     | 1 Not Annotated                                                                                                                   | Not Annotated                                                                                                                                                                                                                                                                                                                                                                                                                                                                                                                                                                                                                  |
|                  |                    |                          |             |     |                                                                                                                                   | Golgi membrane molecular_function sugar:hydrogen symporter activity cellular_component intracellular cell cytoplasm endosome Golgi apparatus trans-Golgi network transport biological_process carbohydrate transport integral component of membrane transmembrane transporter activity organelle nucleotide-sugar transmembrane transporter activity nucleotide-sugar transport                                                                                                                                                                                                                                                |
| GRMZM2G007909    | -0.663736484       | 3.618199952              | 0.019313908 |     | 1 Nuc_sug_transpt UDP_gal_transpt                                                                                                 |                                                                                                                                                                                                                                                                                                                                                                                                                                                                                                                                                                                                                                |
| GRMZM2G075077    | -1.767278816       | -0.609861625             | 0.019339419 |     | 1 Zein-bd                                                                                                                         | Not Annotated                                                                                                                                                                                                                                                                                                                                                                                                                                                                                                                                                                                                                  |
| AC195914.2_FG003 | 2.865921991        | -0.993660172             | 0.01936639  |     | 1 Not Annotated                                                                                                                   | Not Annotated                                                                                                                                                                                                                                                                                                                                                                                                                                                                                                                                                                                                                  |
|                  |                    |                          |             |     |                                                                                                                                   | sulfate assimilation nucleotide binding molecular_function adenylylsulfate kinase activity ATP binding sulfur compound metabolic process biological_process biosynthetic process kinase activity phosphorylation transferase activity hydrogen sulfide biosynthetic process                                                                                                                                                                                                                                                                                                                                                    |
| GRMZM5G845021    | -0.815317387       | 1.468443532              | 0.0193676   |     | 1 APS_kinase                                                                                                                      |                                                                                                                                                                                                                                                                                                                                                                                                                                                                                                                                                                                                                                |

| Gene          | log2 (fold change) | log2 (count per million) | P-value     | FDR | Interpro                                                                                        | GO                                                                                                                                                                                                                                                                                                                                                                                                                                                                                                                                                                                                                                                                                                                                       |
|---------------|--------------------|--------------------------|-------------|-----|-------------------------------------------------------------------------------------------------|------------------------------------------------------------------------------------------------------------------------------------------------------------------------------------------------------------------------------------------------------------------------------------------------------------------------------------------------------------------------------------------------------------------------------------------------------------------------------------------------------------------------------------------------------------------------------------------------------------------------------------------------------------------------------------------------------------------------------------------|
| GRMZM2G098622 | -0.372424947       | 4.770702291              | 0.019370404 |     | 1 Not Annotated                                                                                 | Not Annotated                                                                                                                                                                                                                                                                                                                                                                                                                                                                                                                                                                                                                                                                                                                            |
| GRMZM5G864266 | -0.416579003       | 5.371316435              | 0.019439883 |     | 1 MATH Peptidase_C19/C67 TRAF-like Pept_C19ubihydrolase_C_CS USP7_ICPO-binding_dom              | molecular_function ubiquitin thiolesterase activity protein binding ubiquitin-dependent protein catabolic process biological_process catabolic process                                                                                                                                                                                                                                                                                                                                                                                                                                                                                                                                                                                   |
| GRMZM2G025123 | -0.493124879       | 3.518147767              | 0.019542567 |     | 1 TatC Sec-indep_translocase_CS                                                                 | reproduction molecular_function cellular_component intracellular cell cytoplasm lipid metabolic process transport biological_process protein transporter activity biosynthetic process protein secretion chloroplast chloroplast thylakoid membrane plastid double fertilization forming a zygote and endosperm thylakoid abscisic acid biosynthetic process thylakoid membrane organization protein transport P-P-bond-hydrolysis-driven protein transmembrane transporter activity membrane integral component of membrane transmembrane transporter activity integral component of thylakoid membrane TAT protein transport complex organelle protein complex receptor complex small molecule metabolic process membrane organization |
| GRMZM2G110201 | -0.438607122       | 5.28341912               | 0.01954337  |     | 1 Thiolase Thiolase-like Thiolase_AS Thiolase_CS Thiolase_acyl_enz_int_AS Thiolase_N Thiolase_C | molecular_function catalytic activity cellular_component intracellular cell cytoplasm peroxisome biological_process metabolic process transferase activity transferase activity, transferring acyl groups transferase activity, transferring acyl groups other than amino-acyl groups organelle                                                                                                                                                                                                                                                                                                                                                                                                                                          |
| GRMZM2G139478 | -1.099164549       | 1.41055323               | 0.019581461 |     | 1 Not Annotated                                                                                 | Not Annotated                                                                                                                                                                                                                                                                                                                                                                                                                                                                                                                                                                                                                                                                                                                            |
| GRMZM2G082906 | 0.769280705        | 3.75778413               | 0.01966659  |     | 1 Not Annotated                                                                                 | Not Annotated                                                                                                                                                                                                                                                                                                                                                                                                                                                                                                                                                                                                                                                                                                                            |
| GRMZM2G030128 | -0.724242789       | 2.678310916              | 0.019705233 |     | 1 Rad50_eukaryotes Zn_hook_Rad50                                                                | telomere maintenance molecular_function ATP binding cellular_component intracellular cell nucleus cytoplasm DNA metabolic process DNA repair double-strand break repair mitotic recombination response to stress biological_process telomere capping Mre11 complex cellular nitrogen compound metabolic process organelle protein complex                                                                                                                                                                                                                                                                                                                                                                                                |
| GRMZM2G089698 | -0.735939286       | 2.04145975               | 0.019803264 |     | 1 Transferase                                                                                   | molecular_function transferase activity transferase activity, transferring acyl groups transferase activity, transferring acyl groups other than amino-acyl groups                                                                                                                                                                                                                                                                                                                                                                                                                                                                                                                                                                       |
| GRMZM2G132095 | -1.665539036       | 1.273214742              | 0.019850946 |     | 1 Not Annotated                                                                                 | Not Annotated                                                                                                                                                                                                                                                                                                                                                                                                                                                                                                                                                                                                                                                                                                                            |
| GRMZM2G056419 | -0.571449904       | 3.458641116              | 0.019936324 |     | 1 WD40_repeat ARPC2/3_su1 WD40_repeat_dom                                                       | molecular_function actin binding protein binding cellular_component intracellular cell nucleus cytoplasm cytoskeleton cytoskeletal protein binding biological_process regulation of actin filament polymerization organelle                                                                                                                                                                                                                                                                                                                                                                                                                                                                                                              |
| GRMZM2G440951 | -0.628959079       | 3.191039282              | 0.019936483 |     | 1 Not Annotated                                                                                 | Not Annotated                                                                                                                                                                                                                                                                                                                                                                                                                                                                                                                                                                                                                                                                                                                            |
| GRMZM5G800842 | -0.668201024       | 4.718327155              | 0.019952989 |     | 1 UBact_repeat Molybdenum_cofac_synth_MoeB Ub-activating_enz_e1_C                               | nucleotide binding molecular_function ATP binding cellular protein modification process biological_process small protein activating enzyme activity                                                                                                                                                                                                                                                                                                                                                                                                                                                                                                                                                                                      |
| GRMZM2G052586 | -1.141820087       | 1.695992102              | 0.020047335 |     | 1 Ribosomal_L35_non-mt Ribosomal_L35                                                            | molecular_function structural constituent of ribosome structural molecule activity cellular_component intracellular cell cytoplasm ribosome translation biological_process biosynthetic process organelle ribonucleoprotein complex                                                                                                                                                                                                                                                                                                                                                                                                                                                                                                      |
| GRMZM2G057408 | -0.551867251       | 3.397890391              | 0.020161785 |     | 1 SANT/Myb Myb_dom_like Myb_dom                                                                 | molecular_function DNA binding chromatin binding response to stress biological_process response to salt stress response to ethylene response to auxin response to abscisic acid response to gibberellin response to salicylic acid response to jasmonic acid response to cadmium ion                                                                                                                                                                                                                                                                                                                                                                                                                                                     |

| Gene          | log2 (fold change) | log2 (count per million) | P-value     | FDR | Interpro                                                                                                                                                                             | GO                                                                                                                                                                                                                                                                                                                                                                                                        |
|---------------|--------------------|--------------------------|-------------|-----|--------------------------------------------------------------------------------------------------------------------------------------------------------------------------------------|-----------------------------------------------------------------------------------------------------------------------------------------------------------------------------------------------------------------------------------------------------------------------------------------------------------------------------------------------------------------------------------------------------------|
| GRMZM2G350265 | -0.785401102       | 2.612803979              | 0.020187711 |     | 1 Not Annotated                                                                                                                                                                      | Not Annotated                                                                                                                                                                                                                                                                                                                                                                                             |
| GRMZM2G159890 | -0.621007209       | 3.26239791               | 0.020234173 |     | 1 Plipid/glycerol_acylTrfase G3P_O-acylTrfase_chlp                                                                                                                                   | molecular_function glycerol-3-phosphate O-acyltransferase activity cellular_component intracellular cell cytoplasm lipid metabolic process glycerophospholipid metabolic process phosphatidylglycerol biosynthetic process biological_process metabolic process biosynthetic process chloroplast plastid chloroplast stroma transferase activity transferase activity, transferring acyl groups organelle |
| GRMZM2G095082 | -0.580252176       | 2.825105584              | 0.020249326 |     | 1 Rhodanese-like_dom                                                                                                                                                                 | cellular_component intracellular cell cytoplasm generation of precursor metabolites and energy response to stress biological_process chloroplast chloroplast thylakoid chloroplast thylakoid membrane plastid thylakoid photosynthetic electron transport in photosystem II chloroplast envelope photosynthesis defense response to bacterium organelle                                                   |
| GRMZM2G037146 | -1.44209438        | -0.361539482             | 0.020273175 |     | 1 a-crystallin/Hsp20_dom HSP20-like_chaperone                                                                                                                                        | Not Annotated                                                                                                                                                                                                                                                                                                                                                                                             |
| GRMZM2G704347 | -1.468621593       | 0.27052566               | 0.020387599 |     | 1 Not Annotated                                                                                                                                                                      | Not Annotated                                                                                                                                                                                                                                                                                                                                                                                             |
| GRMZM5G872499 | -0.396413183       | 4.455875784              | 0.020450432 |     | 1 EXS_C                                                                                                                                                                              | cellular_component integral component of membrane                                                                                                                                                                                                                                                                                                                                                         |
| GRMZM2G149802 | -0.296865432       | 5.123965495              | 0.020471093 |     | 1 DNA-dir_DNA_pol_B_pol2 DNA-dir_DNA_pol_B_exonuc DNA-dir_DNA_pol_B_multi_dom DNA-dir_DNA_pol_B RNase H-like_dom Znf_DNA-dir_DNA_pol_B_alpha DNA-dir_DNA_pol_B_CS DNA_pol_a_cat_su_N | nucleotide binding nucleoside binding molecular_function nucleic acid binding DNA binding DNA-directed DNA polymerase activity nucleobase-containing compound metabolic process DNA metabolic process DNA replication biological_process biosynthetic process nucleotidyltransferase activity cellular nitrogen compound metabolic process                                                                |
| GRMZM2G088138 | -2.549401359       | -0.877808196             | 0.020486611 |     | 1 DUF3119                                                                                                                                                                            | Not Annotated                                                                                                                                                                                                                                                                                                                                                                                             |
| GRMZM2G077181 | -1.309185032       | 1.437626316              | 0.020614203 |     | 1 Glycosyl_hydrolases_36 Glycoside_hydrolase_SF                                                                                                                                      | Not Annotated                                                                                                                                                                                                                                                                                                                                                                                             |
| GRMZM2G122954 | -1.607752134       | -0.371954721             | 0.020675735 |     | 1 BRO1_dom                                                                                                                                                                           | cellular_component intracellular cell cytoplasm vacuole organelle                                                                                                                                                                                                                                                                                                                                         |
| GRMZM5G893864 | -0.638348374       | 4.717877373              | 0.020719952 |     | 1 Cation_transp_P_typ_ATPase ATPase_P_typ_cation-transptr_C HAD-like_dom                                                                                                             | molecular_function cellular_component transport cation transport biological_process integral component of membrane ATPase activity cation-transporting ATPase activity transmembrane transporter activity                                                                                                                                                                                                 |
| GRMZM2G139846 | -2.289708685       | -1.192674193             | 0.020734685 |     | 1 Znf_ZZ                                                                                                                                                                             | molecular_function zinc ion binding ion binding                                                                                                                                                                                                                                                                                                                                                           |
| GRMZM2G045259 | -0.39728557        | 4.941507209              | 0.02079505  |     | 1 Prot_kinase_dom Ser/Thr_kinase_AS Kinase-like_dom                                                                                                                                  | molecular_function protein kinase activity protein serine/threonine kinase activity ATP binding cellular protein modification process protein phosphorylation biological_process kinase activity transferase activity, transferring phosphorus-containing groups                                                                                                                                          |
| GRMZM2G305096 | -0.82820131        | 0.936800356              | 0.020805736 |     | 1 Not Annotated                                                                                                                                                                      | Not Annotated                                                                                                                                                                                                                                                                                                                                                                                             |



| Gene             | log2 (fold change) | log2 (count per million) | P-value     | FDR | Interpro                                                | GO                                                                                                                                                                                                                                                                                                                                                                                                                                                                       |
|------------------|--------------------|--------------------------|-------------|-----|---------------------------------------------------------|--------------------------------------------------------------------------------------------------------------------------------------------------------------------------------------------------------------------------------------------------------------------------------------------------------------------------------------------------------------------------------------------------------------------------------------------------------------------------|
| GRMZM2G052670    | -0.376115685       | 4.841361061              | 0.02080878  | 1   | Sec1-like                                               | transport vesicle docking involved in exocytosis biological_process vesicle-mediated transport cellular_component intracellular cell cytoplasm vacuole trans-Golgi network intracellular protein transport plant-type vacuole membrane organelle                                                                                                                                                                                                                         |
| GRMZM2G071208    | -0.502717017       | 5.892222855              | 0.020923663 | 1   | Aminotrans_IV B_aminotrans Aminotrans_IV_CS             | molecular_function catalytic activity branched-chain-amino-acid transaminase activity cellular_component intracellular cell cytoplasm cellular amino acid metabolic process biological_process metabolic process transaminase activity branched-chain amino acid metabolic process chloroplast plastid transferase activity organelle small molecule metabolic process L-leucine transaminase activity L-valine transaminase activity L-isoleucine transaminase activity |
| GRMZM2G015923    | -0.905183903       | 0.783912279              | 0.020961579 | 1   | Glyco_trans_8                                           | molecular_function transferase activity, transferring glycosyl groups                                                                                                                                                                                                                                                                                                                                                                                                    |
| GRMZM2G035821    | -0.719720425       | 2.721787974              | 0.020977861 | 1   | Znf_RING                                                | molecular_function protein binding zinc ion binding ion binding metal ion binding                                                                                                                                                                                                                                                                                                                                                                                        |
| GRMZM2G163954    | -1.217218349       | 2.92168359               | 0.021020182 | 1   | Not Annotated                                           | Not Annotated                                                                                                                                                                                                                                                                                                                                                                                                                                                            |
| GRMZM2G334239    | -2.273244919       | -0.781570611             | 0.021140811 | 1   | Ribosomal_S4e_central_region                            | molecular_function structural constituent of ribosome structural molecule activity cellular_component intracellular cell cytoplasm ribosome translation biological_process biosynthetic process organelle                                                                                                                                                                                                                                                                |
| GRMZM2G074241    | -0.558243185       | 4.801933231              | 0.02118867  | 1   | ABC_transporter-like ABC_transporter_CS ABC_Peroxi_TM   | nucleotide binding molecular_function ATP binding ATP catabolic process biological_process catabolic process ATPase activity cellular nitrogen compound metabolic process nucleobase-containing compound catabolic process small molecule metabolic process cellular_component transport membrane                                                                                                                                                                        |
| GRMZM2G335111    | 6.024278545        | -1.546090948             | 0.021203742 | 1   | Glyco_hydro_17 Glycoside_hydrolase_SF                   | molecular_function catalytic activity hydrolase activity, hydrolyzing O-glycosyl compounds carbohydrate metabolic process biological_process metabolic process hydrolase activity hydrolase activity, acting on glycosyl bonds                                                                                                                                                                                                                                           |
| GRMZM2G465257    | -1.345180128       | 0.088430564              | 0.021210408 | 1   | Not Annotated                                           | Not Annotated                                                                                                                                                                                                                                                                                                                                                                                                                                                            |
| GRMZM2G105522    | -1.408086385       | 2.366321823              | 0.021291201 | 1   | DUF506_pln                                              | Not Annotated                                                                                                                                                                                                                                                                                                                                                                                                                                                            |
| GRMZM2G106795    | -0.542733425       | 4.744506626              | 0.021325344 | 1   | Small_GTP-binding_dom Small_GTPase_ARF Small_GTPase_ARF | nucleotide binding molecular_function GTP binding cellular_component intracellular cell signal transduction small GTPase mediated signal transduction biological_process                                                                                                                                                                                                                                                                                                 |
| GRMZM2G037648    | -2.289708685       | -1.233347303             | 0.021332325 | 1   | Not Annotated                                           | Not Annotated                                                                                                                                                                                                                                                                                                                                                                                                                                                            |
| GRMZM2G103825    | -0.873210695       | 3.260902438              | 0.021366607 | 1   | Amidase Amidase_dom                                     | molecular_function ligase activity carbon-nitrogen ligase activity, with glutamine as amido-N-donor                                                                                                                                                                                                                                                                                                                                                                      |
| AC210303.3_FG001 | -0.806892544       | 1.963232265              | 0.021401881 | 1   | Not Annotated                                           | chloroplast thylakoid membrane organization vegetative to reproductive phase transition of meristem chloroplast membrane                                                                                                                                                                                                                                                                                                                                                 |
| AC155352.2_FG001 | 2.229478942        | -1.205838819             | 0.021466043 | 1   | Cactin_dom                                              | Not Annotated                                                                                                                                                                                                                                                                                                                                                                                                                                                            |
| GRMZM2G023884    | -0.523526619       | 3.304281097              | 0.021581389 | 1   | Glyco_trans_ALG6/ALG8                                   | molecular_function cellular_component intracellular cell cytoplasm endoplasmic reticulum endoplasmic reticulum membrane transferase activity, transferring glycosyl groups transferase activity, transferring hexosyl groups organelle                                                                                                                                                                                                                                   |
| GRMZM2G159542    | -0.460038063       | 3.90690684               | 0.021611703 | 1   | TPR_1 Amidase TPR_contain_dom TPR_rep Amidase_dom       | molecular_function protein binding protein targeting to mitochondrion ligase activity carbon-nitrogen ligase activity, with glutamine as amido-N-donor                                                                                                                                                                                                                                                                                                                   |
| GRMZM2G090505    | -0.355442614       | 4.719856312              | 0.02161974  | 1   | EF_hand_dom Caleosin                                    | molecular_function calcium ion binding ion binding                                                                                                                                                                                                                                                                                                                                                                                                                       |
| GRMZM5G878153    | -0.532133693       | 3.757105795              | 0.02164844  | 1   | ASCH_domain PUA-like_domain                             | Not Annotated                                                                                                                                                                                                                                                                                                                                                                                                                                                            |

| Gene          | log2 (fold change) | log2 (count per million) | P-value     | FDR | Interpro                                                                                                                                  | GO                                                                                                                                                                                                                                                                                                                                                                                                                                                                                                                                                                                                                                                                                                                                                                                                                                                                                                                                                                                         |
|---------------|--------------------|--------------------------|-------------|-----|-------------------------------------------------------------------------------------------------------------------------------------------|--------------------------------------------------------------------------------------------------------------------------------------------------------------------------------------------------------------------------------------------------------------------------------------------------------------------------------------------------------------------------------------------------------------------------------------------------------------------------------------------------------------------------------------------------------------------------------------------------------------------------------------------------------------------------------------------------------------------------------------------------------------------------------------------------------------------------------------------------------------------------------------------------------------------------------------------------------------------------------------------|
| GRMZM2G087479 | -0.841824195       | 1.228809553              | 0.02166693  | 1   | Sub_transporter Sugar_transporter_CS MFS MFS_dom_general_su                                                                               | molecular_function transporter activity cellular_component transport biological_process membrane integral component of membrane transmembrane transporter activity transmembrane transport                                                                                                                                                                                                                                                                                                                                                                                                                                                                                                                                                                                                                                                                                                                                                                                                 |
| GRMZM2G145012 | -1.257654231       | 2.405727415              | 0.021699896 | 1   | bst_transpt MFS_dom                                                                                                                       | Not Annotated                                                                                                                                                                                                                                                                                                                                                                                                                                                                                                                                                                                                                                                                                                                                                                                                                                                                                                                                                                              |
| GRMZM2G115162 | -0.482907224       | 2.085522544              | 0.021723175 | 1   | Ankyrin_rpt BTB/POZ-like BTB/POZ_fold Ankyrin_rpt-contain_dom NPR1/NIM1-like_C DUF3420                                                    | immune system process molecular_function protein binding cellular_component intracellular cell nucleus response to stress biological_process response to bacterium response to fungus defense response to bacterium, incompatible interaction defense response to fungus, incompatible interaction defense response to bacterium organelle defense response to fungus effector dependent induction by symbiont of host immune response salicylic acid binding regulation of jasmonic acid mediated signaling pathway regulation of salicylic acid mediated signaling pathway                                                                                                                                                                                                                                                                                                                                                                                                               |
| GRMZM2G123986 | -0.489725986       | 6.897478469              | 0.021796043 | 1   | TPR_1                                                                                                                                     | molecular_function protein binding regulation of sulfur utilization response to stress biological_process cellular response to sulfur starvation                                                                                                                                                                                                                                                                                                                                                                                                                                                                                                                                                                                                                                                                                                                                                                                                                                           |
| GRMZM5G840699 | -0.657318823       | 2.307754321              | 0.021859535 | 1   | Cation_transp_P_typ_ATPase ATPase_P_typ_Plipid-transp ATPase_P_typ_transduc_dom_A ATPase_P_typ_P_site HAD-like_dom ATPase_P_typ_cyto_domN | nucleotide binding magnesium ion binding molecular_function phospholipid-translocating ATPase activity ATP binding cellular_component transport cation transport biological_process phospholipid transport integral component of membrane ATPase activity cation-transporting ATPase activity transmembrane transporter activity ion binding metal ion binding reproduction molecular_function plasma                                                                                                                                                                                                                                                                                                                                                                                                                                                                                                                                                                                      |
| GRMZM2G017845 | -0.357055211       | 4.004194091              | 0.021958505 | 1   | Ubiquitin-int_motif Znf_LIM DA1_1_like                                                                                                    | membrane biological_process zinc ion binding small conjugating protein binding ubiquitin binding ion binding negative regulation of organ growth metal ion binding seed morphogenesis ovule morphogenesis anatomical structure development                                                                                                                                                                                                                                                                                                                                                                                                                                                                                                                                                                                                                                                                                                                                                 |
| GRMZM2G024739 | -0.53279483        | 3.501952664              | 0.021978686 | 1   | Photolyase_FAD-bd/Cryptochr_C Cryptochrome/DNA_photolyase_1 DNA_photolyase_N Cryptochrome_pln DNA_photolyase_1_CS_C Cryptochrome_C        | molecular_function DNA photolyase activity protein kinase activity signal transducer activity ATP binding cellular_component intracellular cell nucleus cytoplasm DNA metabolic process DNA repair cellular protein modification process response to stress signal transduction biological_process cell death response to water deprivation detection of light stimulus response to blue light photomorphogenesis blue light signaling pathway blue light photoreceptor activity regulation of meristem growth stomatal movement singlet oxygen-mediated programmed cell death circadian regulation of calcium ion oscillation kinase activity lyase activity secondary metabolic process cellular nitrogen compound metabolic process homeostatic process protein homodimerization activity organelle anthocyanin-containing compound metabolic process protein autophosphorylation anatomical structure development regulation of unidimensional cell growth oxidation-reduction process |
| GRMZM5G817777 | -1.358188787       | 0.260628547              | 0.022050097 | 1   | Lipase_GDXG_AS AB_hydrolase_3                                                                                                             | molecular_function biological_process metabolic process hydrolase activity                                                                                                                                                                                                                                                                                                                                                                                                                                                                                                                                                                                                                                                                                                                                                                                                                                                                                                                 |
| GRMZM2G088336 | -1.457863857       | 1.123029233              | 0.022089954 | 1   | Not Annotated                                                                                                                             | Not Annotated                                                                                                                                                                                                                                                                                                                                                                                                                                                                                                                                                                                                                                                                                                                                                                                                                                                                                                                                                                              |

| Gene          | log2 (fold change) | log2 (count per million) | P-value     | FDR | Interpro                                                                                 | GO                                                                                                                                                                                                                                                                                                                                                                                                                                                                     |
|---------------|--------------------|--------------------------|-------------|-----|------------------------------------------------------------------------------------------|------------------------------------------------------------------------------------------------------------------------------------------------------------------------------------------------------------------------------------------------------------------------------------------------------------------------------------------------------------------------------------------------------------------------------------------------------------------------|
| GRMZM2G179424 | -0.425333276       | 3.774487274              | 0.022143305 | 1   | WD40_repeat WD40_repeat_dom WD40_repeat_CS DUF3639                                       | molecular_function protein binding                                                                                                                                                                                                                                                                                                                                                                                                                                     |
| GRMZM2G348551 | -0.454298714       | 6.69204655               | 0.022182791 | 1   | Glyco_trans_1 Glycogen/starch_synth Starc                                                | molecular_function carbohydrate metabolic process biological_process starch synthase activity biosynthetic process glucan biosynthetic process transferase activity, transferring glycosyl groups                                                                                                                                                                                                                                                                      |
| GRMZM2G038532 | -0.472671393       | 4.194650943              | 0.022183874 | 1   | h_synth_cat_dom<br>DUF829_TM53                                                           | Not Annotated                                                                                                                                                                                                                                                                                                                                                                                                                                                          |
| GRMZM2G132810 | -0.695449029       | 4.674141591              | 0.022270082 | 1   | FH2_Formin                                                                               | molecular_function actin binding cytoskeleton organization cytoskeletal protein binding biological_process cellular component organization actin cytoskeleton organization                                                                                                                                                                                                                                                                                             |
| GRMZM2G051270 | -0.358354524       | 5.60458832               | 0.022279589 | 1   | Sulphate_adenylyltransferase PUA-like_domain Sulfurylase_cat_dom ATP-Sase_PUA-like_dom   | sulfate assimilation molecular_function sulfate adenylyltransferase (ATP) activity cellular_component intracellular cell cytoplasm mitochondrion plasma membrane sulfur compound metabolic process biological_process chloroplast plastid chloroplast stroma nucleotidyltransferase activity organelle response to cadmium ion                                                                                                                                         |
| GRMZM2G110483 | -0.689256367       | 1.563391976              | 0.022290442 | 1   | Pentatricopeptide_repeat                                                                 | Not Annotated                                                                                                                                                                                                                                                                                                                                                                                                                                                          |
| GRMZM2G128056 | -0.464923169       | 7.060276755              | 0.022298834 | 1   | Peptidase_S10 Peptidase_S10_AS                                                           | molecular_function carboxypeptidase activity serine-type carboxypeptidase activity cellular_component intracellular cell cytoplasm vacuole proteolysis biological_process peptidase activity organelle                                                                                                                                                                                                                                                                 |
| GRMZM2G156356 | -0.488135967       | 4.110057178              | 0.022337177 | 1   | Not Annotated                                                                            | maltose metabolic process molecular_function maltose transmembrane transporter activity cellular_component intracellular cell cytoplasm carbohydrate metabolic process starch catabolic process transport cell communication multicellular organismal development biological_process catabolic process plastid response to nematode response to gravity chloroplast inner membrane chloroplast envelope maltose transport transmembrane transporter activity organelle |
| GRMZM2G038916 | -2.098381624       | -0.900565958             | 0.022372163 | 1   | Not Annotated                                                                            | Not Annotated                                                                                                                                                                                                                                                                                                                                                                                                                                                          |
| GRMZM2G007757 | -0.560312819       | 3.01503066               | 0.022395777 | 1   | Ketoacyl_synth_N Ketoacyl_synth_C Thioester-like 3-oxoacyl-ACP_synth-2 Ketoacyl_synth_AS | molecular_function catalytic activity lipid metabolic process fatty acid biosynthetic process biological_process metabolic process biosynthetic process transferase activity transferase activity, transferring acyl groups transferase activity, transferring acyl groups other than amino-acyl groups small molecule metabolic process                                                                                                                               |
| GRMZM2G031001 | -0.569821881       | 2.997362294              | 0.022397387 | 1   | NAC-dom                                                                                  | molecular_function DNA binding regulation of transcription, DNA-templated biological_process                                                                                                                                                                                                                                                                                                                                                                           |
| GRMZM2G071076 | -0.59900308        | 4.244207828              | 0.022431879 | 1   | Choline_transprtr-like                                                                   | cellular_component membrane integral component of membrane                                                                                                                                                                                                                                                                                                                                                                                                             |

| Gene          | log2 (fold change) | log2 (count per million) | P-value     | FDR | Interpro                                                                   | GO                                                                                                                                                                                                                                                                                                                                                                                                                                                                                                                                                                                                                                                                                                                                                                                                                                                                                                                                                                                                    |
|---------------|--------------------|--------------------------|-------------|-----|----------------------------------------------------------------------------|-------------------------------------------------------------------------------------------------------------------------------------------------------------------------------------------------------------------------------------------------------------------------------------------------------------------------------------------------------------------------------------------------------------------------------------------------------------------------------------------------------------------------------------------------------------------------------------------------------------------------------------------------------------------------------------------------------------------------------------------------------------------------------------------------------------------------------------------------------------------------------------------------------------------------------------------------------------------------------------------------------|
| GRMZM2G080603 | -0.605332963       | 13.70922407              | 0.022534127 | 1   | RRM_dom                                                                    | reproduction nucleotide binding alternative mRNA splicing, via spliceosome immune system process molecular_function nucleic acid binding DNA binding double-stranded DNA binding single-stranded DNA binding mRNA binding cellular_component cell wall intracellular cell nucleus nucleolus cytoplasm peroxisome cytosol plasma membrane DNA metabolic process mRNA export from nucleus transport nucleocytoplasmic transport response to stress response to osmotic stress circadian rhythm biological_process response to cold response to water deprivation plasmodesma chloroplast plastid response to salt stress response to abscisic acid response to zinc ion regulation of stomatal movement vegetative to reproductive phase transition of meristem RNA secondary structure unwinding external encapsulating structure DNA duplex unwinding cellular nitrogen compound metabolic process organelle innate immune response response to cadmium ion apoplast anatomical structure development |
| GRMZM2G358236 | -1.280769633       | 1.277425092              | 0.0225829   | 1   | DNA-dir_DNA_pol_B_mt/vir Ribosomal_S12_bac Ribosomal_S12/S23 NA-bd_OB-fold | nucleotide binding molecular_function DNA binding DNA-directed DNA polymerase activity nuclease activity DNA metabolic process DNA replication biological_process 3'-5' exonuclease activity biosynthetic process nucleotidyltransferase activity cellular nitrogen compound metabolic process structural constituent of ribosome structural molecule activity cellular_component intracellular cell cytoplasm mitochondrion ribosome translation small ribosomal subunit ribonucleoprotein complex organelle                                                                                                                                                                                                                                                                                                                                                                                                                                                                                         |
| GRMZM2G109987 | -0.436444797       | 3.877515878              | 0.022587792 | 1   | START_lipid-bd_dom Homeobox_dom Homeodomain-like MEKHLA                    | nucleic acid binding transcription factor activity molecular_function DNA binding sequence-specific DNA binding transcription factor activity cellular_component intracellular cell nucleus regulation of transcription, DNA-templated biological_process determination of bilateral symmetry polarity specification of adaxial/abaxial axis radial pattern formation meristem initiation xylem and phloem pattern formation cell differentiation organelle sequence-specific DNA binding anatomical structure development                                                                                                                                                                                                                                                                                                                                                                                                                                                                            |
| GRMZM2G136366 | -0.767806178       | 2.073208825              | 0.022659259 | 1   | Fmu/NOL1/Nop2p Fmu/NOL1/Nop2p_CS RCMT_NCL1                                 | molecular_function RNA binding methyltransferase activity cellular_component intracellular cell cytoplasm plasma membrane chloroplast plastid membrane organelle                                                                                                                                                                                                                                                                                                                                                                                                                                                                                                                                                                                                                                                                                                                                                                                                                                      |
| GRMZM2G355572 | -1.642497133       | 0.946787949              | 0.022683639 | 1   | Not Annotated                                                              |                                                                                                                                                                                                                                                                                                                                                                                                                                                                                                                                                                                                                                                                                                                                                                                                                                                                                                                                                                                                       |
| GRMZM2G536120 | 3.440428197        | -1.309729367             | 0.022716754 | 1   | Ankyrin_rpt TPR_2 TPR_repeat Ankyrin_rpt-contain_dom                       | molecular_function protein binding                                                                                                                                                                                                                                                                                                                                                                                                                                                                                                                                                                                                                                                                                                                                                                                                                                                                                                                                                                    |
| GRMZM2G000937 | -0.793010899       | 4.063120986              | 0.022727989 | 1   | GPI_mannosylTrfase                                                         | molecular_function cellular_component intracellular cell cytoplasm endoplasmic reticulum cellular protein modification process GPI anchor biosynthetic process lipid metabolic process biological_process biosynthetic process transferase activity, transferring glycosyl groups intrinsic component of endoplasmic reticulum membrane organelle                                                                                                                                                                                                                                                                                                                                                                                                                                                                                                                                                                                                                                                     |
| GRMZM2G428676 | -7.048957178       | -0.895205386             | 0.022866782 | 1   | Not Annotated                                                              | Not Annotated                                                                                                                                                                                                                                                                                                                                                                                                                                                                                                                                                                                                                                                                                                                                                                                                                                                                                                                                                                                         |
| GRMZM2G086496 | -0.509203126       | 3.529398007              | 0.022941065 | 1   | POT_fam MFS_dom_general_subst_transpt PTR2_symporter_CS                    | molecular_function transporter activity cellular_component cell plasma membrane transport oligopeptide transport response to stress biological_process response to water deprivation response to nitrate nitrate transmembrane transporter activity nitrate transport membrane integral component of membrane transmembrane transporter activity                                                                                                                                                                                                                                                                                                                                                                                                                                                                                                                                                                                                                                                      |

| Gene          | log2 (fold change) | log2 (count per million) | P-value     | FDR | Interpro                                                                                                                                                                        | GO                                                                                                                                                                                                                                                                                                                                                                                                                                                                                                                                                                                                                                                                                                                                                                                                                                         |
|---------------|--------------------|--------------------------|-------------|-----|---------------------------------------------------------------------------------------------------------------------------------------------------------------------------------|--------------------------------------------------------------------------------------------------------------------------------------------------------------------------------------------------------------------------------------------------------------------------------------------------------------------------------------------------------------------------------------------------------------------------------------------------------------------------------------------------------------------------------------------------------------------------------------------------------------------------------------------------------------------------------------------------------------------------------------------------------------------------------------------------------------------------------------------|
| GRMZM2G336337 | 4.027699685        | -1.718568738             | 0.022948362 | 1   | Cu_oxidase_Cu_BS Cu-oxidase Cupredoxin Cu-oxidase_2 Cu-oxidase_3 Laccase                                                                                                        | molecular_function copper ion binding cellular_component extracellular region biological_process catabolic process oxidoreductase activity secondary metabolic process ion binding lignin catabolic process response to copper ion metal ion binding apoplast hydroquinone:oxygen oxidoreductase activity oxidation-reduction process                                                                                                                                                                                                                                                                                                                                                                                                                                                                                                      |
| GRMZM2G471529 | -0.341943648       | 2.961430442              | 0.023009976 | 1   | Sig_transdc_His_kin-like_C EnvZ-like_dim/P HATPase_A TP-bd Sig_transdc_resp-reg_receiver Sig_transdc_His_kinase_core CHASE Sig_transdc_His_kinase_dimeric CheY-like_superfamily | phosphorelay sensor kinase activity phosphorelay response regulator activity phosphorelay signal transduction system molecular_function signal transducer activity osmosensor activity ATP binding cellular_component cell plasma membrane regulation of transcription, DNA-templated response to stress response to osmotic stress signal transduction aging biological_process response to cold response to water deprivation response to salt stress regulation of seed germination leaf senescence regulation of chlorophyll catabolic process membrane kinase activity phosphorylation transferase activity, transferring phosphorus-containing groups signal transduction by phosphorylation intracellular signal transduction defense response to bacterium regulation of shoot system development anatomical structure development |
| GRMZM2G102196 | -0.400360753       | 3.455134337              | 0.023050435 | 1   | Not Annotated                                                                                                                                                                   | cytosol                                                                                                                                                                                                                                                                                                                                                                                                                                                                                                                                                                                                                                                                                                                                                                                                                                    |
| GRMZM2G047347 | -1.16962564        | 2.106228702              | 0.023079672 | 1   | Aminotrans_IV B_ami-no_transII Aminotrans_IV_CS                                                                                                                                 | molecular_function catalytic activity branched-chain-amino-acid transaminase activity cellular_component intracellular cell cytoplasm cellular amino acid metabolic process biological_process metabolic process transaminase activity branched-chain amino acid metabolic process chloroplast plastid transferase activity organelle small molecule metabolic process L-leucine transaminase activity L-valine transaminase activity L-isoleucine transaminase activity                                                                                                                                                                                                                                                                                                                                                                   |
| GRMZM2G007252 | 1.37577658         | 1.394229729              | 0.023243512 | 1   | 3Beta_OHsteriod_DH/Estase                                                                                                                                                       | nucleotide binding molecular_function 3-beta-hydroxy-delta5-steroid dehydrogenase activity lipid metabolic process steroid biosynthetic process biological_process biosynthetic process oxidoreductase activity oxidoreductase activity, acting on the CH-OH group of donors, NAD or NADP as acceptor oxidation-reduction process                                                                                                                                                                                                                                                                                                                                                                                                                                                                                                          |
| GRMZM2G087243 | 1.035841007        | 1.842825123              | 0.023263934 | 1   | Armadillo ARM-type_fold                                                                                                                                                         | molecular_function binding protein binding                                                                                                                                                                                                                                                                                                                                                                                                                                                                                                                                                                                                                                                                                                                                                                                                 |
| GRMZM2G088737 | -0.403767866       | 3.611770695              | 0.023293615 | 1   | Ost-alpha                                                                                                                                                                       | Not Annotated                                                                                                                                                                                                                                                                                                                                                                                                                                                                                                                                                                                                                                                                                                                                                                                                                              |
| GRMZM2G460617 | -3.185007782       | -1.877044291             | 0.023311472 | 1   | Not Annotated                                                                                                                                                                   | Not Annotated                                                                                                                                                                                                                                                                                                                                                                                                                                                                                                                                                                                                                                                                                                                                                                                                                              |
| GRMZM2G359365 | -0.474915596       | 4.432360754              | 0.02332386  | 1   | Cation_transp_P_typ_1 ATPase HAD-like_dom                                                                                                                                       | molecular_function cellular_component endoplasmic reticulum plasma membrane ATP catabolic process transport cation transport cellular metal ion homeostasis biological_process catabolic process pollen germination meristem maintenance pollen maturation integral component of membrane cellular response to phosphate starvation ATPase activity cation-transporting ATPase activity transmembrane transporter activity cellular nitrogen compound metabolic process nucleobase-containing compound catabolic process small molecule metabolic process stem cell fate determination                                                                                                                                                                                                                                                     |

| Gene          | log2 (fold change) | log2 (count per million) | P-value     | FDR | Interpro                                                                                                                       | GO                                                                                                                                                                                                                                                                                                                                                                                                                                                                                                                                                                                                                                                                                                                                                                                                                                                                                                                                           |
|---------------|--------------------|--------------------------|-------------|-----|--------------------------------------------------------------------------------------------------------------------------------|----------------------------------------------------------------------------------------------------------------------------------------------------------------------------------------------------------------------------------------------------------------------------------------------------------------------------------------------------------------------------------------------------------------------------------------------------------------------------------------------------------------------------------------------------------------------------------------------------------------------------------------------------------------------------------------------------------------------------------------------------------------------------------------------------------------------------------------------------------------------------------------------------------------------------------------------|
| GRMZM2G441347 | 0.708380592        | 5.684284182              | 0.023334915 |     | Aromatic_Lyase Phe_NH3-lyase L-Aspartase-like Phe/His_NH3-lyase_AS                                                             | molecular_function catalytic activity cellular_component intracellular cell cytoplasm cellular amino acid metabolic process L-phenylalanine catabolic process biological_process catabolic process biosynthetic process phenylpropanoid metabolic process cinnamic acid biosynthetic process lyase activity ammonia-lyase activity secondary metabolic process small molecule metabolic process phenylalanine ammonia-lyase activity                                                                                                                                                                                                                                                                                                                                                                                                                                                                                                         |
| GRMZM2G494514 | -0.461283796       | 4.022948518              | 0.023368851 |     | VWF_A C2_dom Copine                                                                                                            | molecular_function protein binding calcium-dependent phospholipid binding cellular_component cell plasma membrane biological_process response to temperature stimulus response to humidity plasmodesma positive regulation of cell size negative regulation of cell death                                                                                                                                                                                                                                                                                                                                                                                                                                                                                                                                                                                                                                                                    |
| GRMZM2G472023 | -0.490483828       | 3.445150415              | 0.023371254 |     | TPR_1 TPR-contain_dom TPR_repeat                                                                                               | G2/M transition of mitotic cell cycle molecular_function protein binding cell cycle biological_process regulation of meristem structural organization meristem structural organization membrane cell division                                                                                                                                                                                                                                                                                                                                                                                                                                                                                                                                                                                                                                                                                                                                |
| GRMZM5G873767 | 0.813175217        | 3.536042029              | 0.02337777  |     | Lipase_GDSL                                                                                                                    | molecular_function lipid metabolic process biological_process hydrolase activity hydrolase activity, acting on ester bonds                                                                                                                                                                                                                                                                                                                                                                                                                                                                                                                                                                                                                                                                                                                                                                                                                   |
| GRMZM2G317770 | -0.457010079       | 3.623144351              | 0.023452583 |     | Prot_kinase_dom Ser/Thr_kinase_AS Kinase-like_dom Protein_kinase_ATP_BS                                                        | nucleotide binding immune system process cell surface pattern recognition receptor signaling pathway molecular_function protein kinase activity protein serine/threonine kinase activity signal transducer activity ATP binding cellular_component cell plasma membrane cellular protein modification process protein phosphorylation response to stress signal transduction biological_process defense response to fungus, incompatible interaction response to chitin kinase activity phosphorylation transferase activity, transferring phosphorus-containing groups transmembrane receptor protein kinase activity detection of molecule of fungal origin detection of peptidoglycan intracellular signal transduction defense response to bacterium protein homodimerization activity innate immune response protein autophosphorylation cellular response to molecule of bacterial origin cellular response to chitin chitosan binding |
| GRMZM5G818431 | -0.787726374       | 1.523930353              | 0.023467622 |     | Kinase-like_dom Prot_kinase_dom Ser/Thr_kinase_AS Protein_kinase_ATP_BS Ser-Thr/Tyr_kinase_cat_dom UspA                        | molecular_function transferase activity, transferring phosphorus-containing groups protein kinase activity protein serine/threonine kinase activity ATP binding cellular protein modification process protein phosphorylation biological_process kinase activity response to stress                                                                                                                                                                                                                                                                                                                                                                                                                                                                                                                                                                                                                                                          |
| GRMZM2G024615 | -0.574496686       | 3.218657533              | 0.02354106  |     | P_Acid_Pase_2/haloperoxidase                                                                                                   | molecular_function catalytic activity cellular_component biological_process metabolic process membrane plasma membrane phosphatidate phosphatase activity abscisic acid-activated signaling pathway                                                                                                                                                                                                                                                                                                                                                                                                                                                                                                                                                                                                                                                                                                                                          |
| GRMZM2G312543 | -0.944391991       | 3.331236182              | 0.023599165 |     | 1 Not Annotated                                                                                                                | Not Annotated                                                                                                                                                                                                                                                                                                                                                                                                                                                                                                                                                                                                                                                                                                                                                                                                                                                                                                                                |
| GRMZM2G529530 | -1.992661944       | -0.161751319             | 0.023638724 |     | 1 Not Annotated                                                                                                                | Not Annotated                                                                                                                                                                                                                                                                                                                                                                                                                                                                                                                                                                                                                                                                                                                                                                                                                                                                                                                                |
| GRMZM2G069201 | -0.583535831       | 2.88512334               | 0.023820822 |     | Leu-rich_rpt Ser-Thr/Tyr_kinase_cat_dom Prot_kinase_dom Ser/Thr_kinase_AS Kinase-like_dom LRR-contain_N2 Protein_kinase_ATP_BS | molecular_function protein kinase activity protein serine/threonine kinase activity protein binding ATP binding cellular protein modification process protein phosphorylation biological_process kinase activity transferase activity, transferring phosphorus-containing groups                                                                                                                                                                                                                                                                                                                                                                                                                                                                                                                                                                                                                                                             |
| GRMZM2G162369 | -0.745093728       | 2.298340071              | 0.023883636 |     | 1 Not Annotated                                                                                                                | cellular_component intracellular cell cytoplasm ribosome organelle                                                                                                                                                                                                                                                                                                                                                                                                                                                                                                                                                                                                                                                                                                                                                                                                                                                                           |

| Gene             | log2 (fold change) | log2 (count per million) | P-value     | FDR | Interpro                                                                  | GO                                                                                                                                                                                                                                                                                                                                                                 |
|------------------|--------------------|--------------------------|-------------|-----|---------------------------------------------------------------------------|--------------------------------------------------------------------------------------------------------------------------------------------------------------------------------------------------------------------------------------------------------------------------------------------------------------------------------------------------------------------|
| GRMZM2G061910    | -2.826521499       | -1.342885699             | 0.024126274 |     | 1 LEA-14                                                                  | Not Annotated                                                                                                                                                                                                                                                                                                                                                      |
| GRMZM2G044472    | 6.214150217        | -1.796008288             | 0.024214392 |     | 1 LACT/PDAT_acyITrfase                                                    | molecular_function lipid metabolic process biological_process O-acyltransferase activity transferase activity, transferring acyl groups                                                                                                                                                                                                                            |
| GRMZM2G037478    | -5.762285887       | -1.844264417             | 0.024249838 |     | 1 AB_hydrolase_3                                                          | molecular_function biological_process metabolic process hydrolase activity                                                                                                                                                                                                                                                                                         |
| GRMZM2G017193    | -2.188514363       | -0.094835559             | 0.024323261 |     | 1 Pyridine_nuc-diS_OxRdtase_2 FAD_pyr_nucl-diS_OxRdtase Flavin_mOase-like | molecular_function N,N-dimethylaniline monooxygenase activity biological_process biosynthetic process auxin biosynthetic process oxidoreductase activity flavin adenine dinucleotide binding NADP binding oxidation-reduction process                                                                                                                              |
| GRMZM2G036872    | -0.450007624       | 4.012553519              | 0.024337484 |     | 1 Pleckstrin_homology RhoGAP_dom Rho_GTase_activation_prot MIP1_Leuzipper | molecular_function protein binding phospholipid binding cellular_component intracellular cell signal transduction biological_process lipid binding                                                                                                                                                                                                                 |
| GRMZM2G464572    | 6.532186565        | -1.609474061             | 0.024487255 |     | 1 UBC-conjugat_E2 UBQ_conjugating_enzyme/RWD                              | molecular_function transport phosphate ion transport response to stress biological_process cellular response to phosphate starvation ligase activity acid-amino acid ligase activity homeostatic process phosphate ion homeostasis                                                                                                                                 |
| GRMZM2G041847    | -0.526378591       | 2.939539859              | 0.024519157 |     | 1 Not Annotated                                                           | Not Annotated                                                                                                                                                                                                                                                                                                                                                      |
| GRMZM2G044697    | -0.443066025       | 3.305537882              | 0.024570227 |     | 1 Peptidase_M50                                                           | molecular_function metalloendopeptidase activity proteolysis biological_process peptidase activity cellular_component intracellular cell cytoplasm chloroplast chloroplast thylakoid membrane plastid thylakoid organelle                                                                                                                                          |
| GRMZM2G038722    | -2.359144022       | -1.030240221             | 0.024656997 |     | 1 SANT/Myb Homeodomain-like Myb_dom                                       | molecular_function DNA binding chromatin binding                                                                                                                                                                                                                                                                                                                   |
| GRMZM2G177532    | -0.608958612       | 3.818722294              | 0.024662403 |     | 1 Cation_efflux                                                           | molecular_function cellular_component transport cation transport biological_process cation transmembrane transporter activity integral component of membrane transmembrane transporter activity transmembrane transport                                                                                                                                            |
| GRMZM2G079823    | -0.591469165       | 5.201609739              | 0.024720447 |     | 1 KH_dom                                                                  | molecular_function RNA binding protein binding cellular_component intracellular cell nucleus organelle                                                                                                                                                                                                                                                             |
| GRMZM5G854948    | -0.735227556       | 2.555065591              | 0.024796594 |     | 1 NOTUM                                                                   | Not Annotated                                                                                                                                                                                                                                                                                                                                                      |
| GRMZM2G053766    | -0.425247216       | 4.008970067              | 0.024811534 |     | 1 APC4_long_dom WD40_repeat WD40_repeat_dom Apc4_WD40_domain              | cellular_component intracellular cell nucleus anaphase-promoting complex biological_process catabolic process embryo development regulation of mitotic metaphase/anaphase transition anaphase-promoting complex-dependent proteasomal ubiquitin-dependent protein catabolic process organelle protein complex ovule development molecular_function protein binding |
| GRMZM2G029243    | -0.73858826        | 4.122270425              | 0.024895144 |     | 1 Glyco_hydro_31 Gal_mutarotase_SF_dom Glycoside_hydrolase_SF             | molecular_function catalytic activity hydrolase activity, hydrolyzing O-glycosyl compounds carbohydrate metabolic process biological_process hydrolase activity, acting on glycosyl bonds carbohydrate binding                                                                                                                                                     |
| GRMZM2G174782    | -1.767278816       | -0.675765693             | 0.024907833 |     | 1 Lipase_GDSL                                                             | molecular_function lipid metabolic process biological_process hydrolase activity hydrolase activity, acting on ester bonds                                                                                                                                                                                                                                         |
| GRMZM2G123969    | -5.66464753        | -1.842930537             | 0.024923745 |     | 1 Ribosomal_L7Ae/L30e/S12e/Gad45 Ribosomal_L30e_CS                        | plasma membrane plasmodesma response to fungus cytosolic large ribosomal subunit cytosolic ribosome                                                                                                                                                                                                                                                                |
| AC202185.4_FG004 | -0.898381211       | 2.136841437              | 0.024955052 |     | 1 a-crystallin/Hsp20_dom HSP20-like_chaperone                             | Not Annotated                                                                                                                                                                                                                                                                                                                                                      |
| GRMZM2G434514    | -1.112880329       | 2.914501235              | 0.02500821  |     | 1 LysM_dom                                                                | biological_process catabolic process cell wall macromolecule catabolic process cell wall organization or biogenesis                                                                                                                                                                                                                                                |

| Gene          | log2 (fold change) | log2 (count per million) | P-value     | FDR | Interpro                                                                                    | GO                                                                                                                                                                                                                                                                                                                                                                                                                                                                                                                                                                                                                                                                       |
|---------------|--------------------|--------------------------|-------------|-----|---------------------------------------------------------------------------------------------|--------------------------------------------------------------------------------------------------------------------------------------------------------------------------------------------------------------------------------------------------------------------------------------------------------------------------------------------------------------------------------------------------------------------------------------------------------------------------------------------------------------------------------------------------------------------------------------------------------------------------------------------------------------------------|
| GRMZM2G015955 | -0.518292029       | 5.681577553              | 0.025025983 | 1   | Zn/Fe_permease_fun/pln ZIP                                                                  | molecular_function copper ion transmembrane transporter activity iron ion transmembrane transporter activity zinc ion transmembrane transporter activity cellular_component cell vacuolar membrane plasma membrane transport iron ion transport zinc ion transport biological_process response to nematode response to zinc ion membrane integral component of membrane transmembrane transporter activity metal ion transport iron ion transmembrane transport copper ion transmembrane transport metal ion transmembrane transporter activity transmembrane transport zinc ion transmembrane transport                                                                 |
| GRMZM2G463167 | -1.658304763       | 2.995875078              | 0.025124657 | 1   | Not Annotated                                                                               | Not Annotated                                                                                                                                                                                                                                                                                                                                                                                                                                                                                                                                                                                                                                                            |
| GRMZM2G158647 | -0.561664526       | 3.124442616              | 0.025159453 | 1   | Not Annotated                                                                               | Not Annotated                                                                                                                                                                                                                                                                                                                                                                                                                                                                                                                                                                                                                                                            |
| GRMZM2G147619 | -0.471603279       | 3.232185208              | 0.025198694 | 1   | Post-SET_dom SET_dom AWS                                                                    | molecular_function protein binding cellular_component intracellular cell nucleus methyltransferase activity histone-lysine N-methyltransferase activity organelle reproduction DNA repair cellular protein modification process biological_process response to UV-B vegetative to reproductive phase transition of meristem histone methylation transferase activity methylation histone lysine methylation anatomical structure development chromosome organization                                                                                                                                                                                                     |
| GRMZM2G055219 | -0.607962638       | 2.962833396              | 0.025199956 | 1   | Golgin_subfamily_A_member_5                                                                 | cellular_component intracellular cell cytoplasm Golgi apparatus organelle                                                                                                                                                                                                                                                                                                                                                                                                                                                                                                                                                                                                |
| GRMZM2G362021 | -2.170387635       | 0.23815453               | 0.025260073 | 1   | D-isomer_2_OHA_DH_cat_dom D-isomer_2_OHA_DH_NAD-bd                                          | nucleotide binding molecular_function biological_process metabolic process oxidoreductase activity oxidoreductase activity, acting on the CH-OH group of donors, NAD or NADP as acceptor cofactor binding NAD binding oxidation-reduction process                                                                                                                                                                                                                                                                                                                                                                                                                        |
| GRMZM2G099984 | 1.735134872        | 1.302120687              | 0.02537094  | 1   | PMP3                                                                                        | cellular_component response to stress biological_process response to cold integral component of membrane hyperosmotic salinity response                                                                                                                                                                                                                                                                                                                                                                                                                                                                                                                                  |
| GRMZM2G119867 | -0.597045211       | 3.751968318              | 0.025427671 | 1   | Not Annotated                                                                               | Not Annotated                                                                                                                                                                                                                                                                                                                                                                                                                                                                                                                                                                                                                                                            |
| GRMZM2G041527 | -0.94072921        | 0.986600296              | 0.025439997 | 1   | RNase_P/MRP_POP1 POPLD                                                                      | tRNA 5'-leader removal molecular_function nuclease activity ribonuclease P activity rRNA processing RNA processing tRNA metabolic process biological_process cellular nitrogen compound metabolic process protein binding transcription factor activity molecular_function transcription cofactor activity histone acetyltransferase activity cellular_component intracellular cell nucleus regulation of transcription, DNA-templated cellular protein modification process protein acetylation biological_process zinc ion binding flower development histone acetylation transferase activity, transferring acyl groups ion binding organelle chromosome organization |
| GRMZM2G139977 | -0.440255506       | 4.546585358              | 0.025461229 | 1   | Znf_ZZ Znf_TAZ Znf_FYVE_PHD Histone_H3-K56_AcTrfase_RTT109 Zinc_finger_PHD-type_CS          | nucleic acid binding transcription factor activity molecular_function DNA binding sequence-specific DNA binding transcription factor activity cellular_component intracellular cell nucleus regulation of transcription, DNA-templated biological_process organelle sequence-specific DNA binding                                                                                                                                                                                                                                                                                                                                                                        |
| GRMZM2G038252 | -6.306344777       | -0.48937641              | 0.025462648 | 1   | Homeobox_dom Homeodomain-like                                                               | nucleic acid binding transcription factor activity molecular_function DNA binding sequence-specific DNA binding transcription factor activity cellular_component intracellular cell nucleus regulation of transcription, DNA-templated biological_process organelle sequence-specific DNA binding                                                                                                                                                                                                                                                                                                                                                                        |
| GRMZM2G304926 | 5.919067406        | -1.999071664             | 0.025462818 | 1   | Not Annotated                                                                               | Not Annotated                                                                                                                                                                                                                                                                                                                                                                                                                                                                                                                                                                                                                                                            |
| GRMZM2G304548 | -0.752808504       | 11.62784874              | 0.02552234  | 1   | Allergen/tryp_amyl_inhib_CS Allergen/soft/tryp_amyl_inhib Bifunctional_inhib/LTP/seed_store | molecular_function serine-type endopeptidase inhibitor activity cellular_component extracellular region biological_process negative regulation of peptidase activity enzyme regulator activity peptidase inhibitor activity                                                                                                                                                                                                                                                                                                                                                                                                                                              |



| Gene          | log2 (fold change) | log2 (count per million) | P-value     | FDR | Interpro                                                                                                                                                                                                                                   | GO                                                                                                                                                                                                                                                                                                                                                                                                                                                          |
|---------------|--------------------|--------------------------|-------------|-----|--------------------------------------------------------------------------------------------------------------------------------------------------------------------------------------------------------------------------------------------|-------------------------------------------------------------------------------------------------------------------------------------------------------------------------------------------------------------------------------------------------------------------------------------------------------------------------------------------------------------------------------------------------------------------------------------------------------------|
| GRMZM2G019177 | -2.216761781       | -1.209109358             | 0.025622764 | 1   | Beta-lactamas-like                                                                                                                                                                                                                         | molecular_function biological_process hydrolase activity response to arsenic-containing substance                                                                                                                                                                                                                                                                                                                                                           |
| GRMZM2G103070 | -0.659857925       | 2.605137626              | 0.025639262 | 1   | Leu-rich_rpt Prot_kinase_dom Kinase-like_dom LRR-contain_N2                                                                                                                                                                                | molecular_function protein kinase activity protein binding ATP binding cellular protein modification process protein phosphorylation biological_process kinase activity transferase activity, transferring phosphorus-containing groups                                                                                                                                                                                                                     |
| GRMZM5G885445 | -1.112221242       | 2.294655082              | 0.025743292 | 1   | Not Annotated                                                                                                                                                                                                                              | Not Annotated                                                                                                                                                                                                                                                                                                                                                                                                                                               |
| GRMZM2G162640 | 0.56466241         | 3.801515446              | 0.025861071 | 1   | BTB/POZ-like BTB/POZ_fold                                                                                                                                                                                                                  | molecular_function protein binding                                                                                                                                                                                                                                                                                                                                                                                                                          |
| GRMZM2G341405 | -0.959895528       | 4.416661988              | 0.025900751 | 1   | UBQ-conjugat_E2 RWD-domain UBQ-conjugating_enzyme/RWD PPase-energised_H-pump Sig_transdc_res_p-reg_receiver CheY-like_superfamily Alfin Ser-Thr/Tyr_kinase_cat_dom Prot_kinase_dom Ser/Thr_kinase_AS Kinase-like_dom Protein_kinase_ATP_BS | molecular_function protein binding ligase activity acid-amino acid ligase activity phosphorelay response regulator activity phosphorelay signal transduction system inorganic diphosphatase activity signal transducer activity cellular_component regulation of transcription, DNA-templated transport signal transduction biological_process hydrogen-translocating pyrophosphatase activity proton transport membrane transmembrane transporter activity |
| GRMZM2G026203 | -1.368096432       | 0.518077816              | 0.025922588 | 1   | Pept_M3A_M3B                                                                                                                                                                                                                               | molecular_function protein kinase activity protein serine/threonine kinase activity ATP binding cellular protein modification process protein phosphorylation biological_process kinase activity transferase activity, transferring phosphorus-containing groups                                                                                                                                                                                            |
| GRMZM2G450659 | -0.629297826       | 3.329119769              | 0.025984753 | 1   | Znf_CW                                                                                                                                                                                                                                     | molecular_function metalloendopeptidase activity proteolysis biological_process peptidase activity cellular_component intracellular cell cytoplasm metallopeptidase activity chloroplast chloroplast thylakoid membrane plastid thylakoid hydrolase activity ion binding organelle metal ion binding                                                                                                                                                        |
| GRMZM2G171068 | -0.525875509       | 3.20908313               | 0.026071125 | 1   | Not Annotated                                                                                                                                                                                                                              | Not Annotated                                                                                                                                                                                                                                                                                                                                                                                                                                               |
| GRMZM5G848838 | 3.837828013        | -1.895590415             | 0.026143058 | 1   | DnaJ_C HSP40/DnaJ_p                                                                                                                                                                                                                        | molecular_function protein folding biological_process unfolded protein binding                                                                                                                                                                                                                                                                                                                                                                              |
| GRMZM2G016281 | -0.846192224       | 1.139933772              | 0.026233281 | 1   | ept-bd                                                                                                                                                                                                                                     | nucleotide binding molecular_function L-iditol 2-dehydrogenase activity cytoplasm biological_process zinc ion binding plasmodesma oxidoreductase activity ion binding metal ion binding oxidation-reduction process                                                                                                                                                                                                                                         |
| GRMZM2G175423 | -0.498101761       | 11.89289719              | 0.02623579  | 1   | ADH_Zn_CS GroES-like ADH_C ADH_GroE S-like                                                                                                                                                                                                 | response to stress biological_process response to cold response to water deprivation response to abscisic acid hyperosmotic salinity response                                                                                                                                                                                                                                                                                                               |
| GRMZM5G862101 | -0.597505335       | 2.182680536              | 0.026314817 | 1   | TB2_DP1_HVA22                                                                                                                                                                                                                              | nucleotide binding molecular_function aminoacyl-tRNA ligase activity ATP binding cellular_component intracellular cell cytoplasm tRNA metabolic process translation tRNA aminoacylation for protein translation cellular amino acid metabolic process biological_process biosynthetic process ligase activity cellular nitrogen compound metabolic process small molecule metabolic process                                                                 |
| GRMZM2G301553 | -1.209559776       | 0.631493606              | 0.026406922 | 1   | aa-tRNA-synth_I_CS DUF1279 NA-bd_OB-fold                                                                                                                                                                                                   | cellular_component intracellular cell cytoplasm mitochondrion vacuole endoplasmic reticulum plasma membrane biological_process regulation of signal transduction membrane integral component of membrane protein processing organelle protein maturation                                                                                                                                                                                                    |
| GRMZM2G451366 | -0.37430401        | 5.502736486              | 0.026492111 | 1   | Nicastrin Nicalin EF_H and_1_Ca_BS                                                                                                                                                                                                         |                                                                                                                                                                                                                                                                                                                                                                                                                                                             |

| Gene          | log2 (fold change) | log2 (count per million) | P-value     | FDR | Interpro                                                                                             | GO                                                                                                                                                                                                                                                                                                                                                                                                                                                                                            |
|---------------|--------------------|--------------------------|-------------|-----|------------------------------------------------------------------------------------------------------|-----------------------------------------------------------------------------------------------------------------------------------------------------------------------------------------------------------------------------------------------------------------------------------------------------------------------------------------------------------------------------------------------------------------------------------------------------------------------------------------------|
| GRMZM2G051406 | -1.245752356       | 2.512565755              | 0.026533596 |     | 1 Not Annotated                                                                                      | Not Annotated                                                                                                                                                                                                                                                                                                                                                                                                                                                                                 |
| GRMZM2G323754 | -0.431943988       | 4.862718539              | 0.026543555 |     | 1 Uncharacterised_FPL                                                                                | Not Annotated                                                                                                                                                                                                                                                                                                                                                                                                                                                                                 |
| GRMZM2G158024 | -0.397760511       | 3.813606749              | 0.026577181 |     | 1 KH_dom_type_2 GTP-bd_Era KH_prok-type Small_GTP-bd_dom GTP_binding_domain                          | nucleotide binding molecular_function RNA binding GTP binding cellular_component intracellular cell cytoplasm chloroplast plastid organelle                                                                                                                                                                                                                                                                                                                                                   |
| GRMZM2G376959 | -6.969409266       | -1.357117882             | 0.026618124 |     | 1 WD40_repeat WD40_repeat_dom WD40_repeat_CS G-protein_beta_WD-40_rep                                | molecular_function protein binding                                                                                                                                                                                                                                                                                                                                                                                                                                                            |
| GRMZM2G127230 | -0.749176671       | 1.868373891              | 0.026688122 |     | 1 SRP_Ffh Signal_recog_particle_SRP54_M AAA_ATPase SRP54_GTPase_dom Signal_recog_particle_SRP54_hlx  | nucleotide binding molecular_function RNA binding GTPase activity GTP binding cellular_component intracellular cell cytoplasm GTP catabolic process protein targeting SRP-dependent cotranslational protein targeting to membrane transport biological_process 7S RNA binding catabolic process nucleoside-triphosphatase activity cellular nitrogen compound metabolic process nucleobase-containing compound catabolic process small molecule metabolic process signal recognition particle |
| GRMZM2G130064 | -0.433794702       | 4.218881085              | 0.026786772 |     | 1 Bac_surfAg_D15 Surface_Ag_variable_number                                                          | cellular_component mitochondrion chloroplast organization chloroplast envelope outer membrane                                                                                                                                                                                                                                                                                                                                                                                                 |
| GRMZM2G026143 | -1.088206334       | 1.112476982              | 0.02686043  |     | 1 Not Annotated                                                                                      | Not Annotated                                                                                                                                                                                                                                                                                                                                                                                                                                                                                 |
| GRMZM2G421256 | -0.643017549       | 2.009285603              | 0.026901958 |     | 1 SANT/Myb Myb_domain plants Homeodomain-like                                                        | molecular_function DNA binding chromatin binding                                                                                                                                                                                                                                                                                                                                                                                                                                              |
| GRMZM2G405476 | 5.919067406        | -1.706369139             | 0.026947065 |     | 1 Ribosomal_L2_bac/org-type Translation_prot_SH3-like Ribosomal_L2_C Ribosomal_L2_CS                 | molecular_function RNA binding structural constituent of ribosome structural molecule activity cellular_component intracellular cell cytoplasm ribosome translation biological_process biosynthetic process chloroplast plastid large ribosomal subunit membrane transferase activity rRNA binding ribonucleoprotein complex organelle                                                                                                                                                        |
| GRMZM2G099238 | -1.39489665        | 3.524433471              | 0.026984877 |     | 1 Znf_RING                                                                                           | molecular_function protein binding zinc ion binding ion binding metal ion binding                                                                                                                                                                                                                                                                                                                                                                                                             |
| GRMZM2G004412 | -0.782325147       | 1.173480759              | 0.027001448 |     | 1 NB-ARC Disease_RSANT/Myb Myb_domain plants Homeodomain-like Myb_domain                             | molecular_function response to stress defense response biological_process ADP binding                                                                                                                                                                                                                                                                                                                                                                                                         |
| GRMZM5G846506 | -1.972778718       | -1.37223668              | 0.027008246 |     | 1 SANT/Myb Myb_domain plants Homeodomain-like Myb_domain                                             | molecular_function DNA binding chromatin binding                                                                                                                                                                                                                                                                                                                                                                                                                                              |
| GRMZM2G067028 | -0.421183358       | 3.232667772              | 0.027151553 |     | 1 Glyas_Fos-R_dOase_dom                                                                              | molecular_function cellular_component intracellular cell cytoplasm chloroplast plastid oxidoreductase activity oxidoreductase activity, acting on single donors with incorporation of molecular oxygen, incorporation of two atoms of oxygen organelle                                                                                                                                                                                                                                        |
| GRMZM2G347743 | -0.409486048       | 4.022121407              | 0.02725666  |     | 1 Peptidase_S10 Peptidase_S10_AS                                                                     | molecular_function carboxypeptidase activity serine-type carboxypeptidase activity proteolysis biological_process peptidase activity                                                                                                                                                                                                                                                                                                                                                          |
| GRMZM2G117612 | -0.516785434       | 4.624566845              | 0.027401102 |     | 1 CUE Znf_RING                                                                                       | molecular_function protein binding zinc ion binding ion binding                                                                                                                                                                                                                                                                                                                                                                                                                               |
| GRMZM2G098828 | -0.375347362       | 3.189541465              | 0.027563412 |     | 1 Ser/Thr_dual-sp_kinase_dom Prot_kinase_dom Ser/Thr_kinase_AS Kinase-like_dom Protein_kinase_ATP_BS | molecular_function protein kinase activity protein serine/threonine kinase activity ATP binding cellular protein modification process protein phosphorylation biological_process kinase activity transferase activity, transferring phosphorus-containing groups                                                                                                                                                                                                                              |

| Gene          | log2 (fold change) | log2 (count per million) | P-value     | FDR | Interpro                                                                                                                                                         | GO                                                                                                                                                                                                                                                                                                                                                                                                                                                                                                                                                                                                  |
|---------------|--------------------|--------------------------|-------------|-----|------------------------------------------------------------------------------------------------------------------------------------------------------------------|-----------------------------------------------------------------------------------------------------------------------------------------------------------------------------------------------------------------------------------------------------------------------------------------------------------------------------------------------------------------------------------------------------------------------------------------------------------------------------------------------------------------------------------------------------------------------------------------------------|
| GRMZM2G398288 | -0.439983753       | 4.186100301              | 0.027711291 | 1   | Cation_transp_P_typ_ATPase ATPase_P_typ_Plipid-transp ATPase_P_typ_transduc_dom_A ATPase_P_typ_P_site HAD-like_dom ATPase_P_typ_cyto_domN                        | nucleotide binding magnesium ion binding molecular_function phospholipid-translocating ATPase activity ATP binding cellular_component transport cation transport biological_process phospholipid transport membrane integral component of membrane hydrolase activity ATPase activity cation-transporting ATPase activity transmembrane transporter activity ion binding metal ion binding                                                                                                                                                                                                          |
| GRMZM2G060886 | -0.614476872       | 5.325276226              | 0.027801546 | 1   | Methyltransf_11 Phosphoethanolamine_N-MeTrfase                                                                                                                   | molecular_function biological_process metabolic process methyltransferase activity methylation reproduction phosphoethanolamine N-methyltransferase activity cell morphogenesis lipid metabolic process phosphatidylcholine biosynthetic process biosynthetic process pollen development unidimensional cell growth pollen tube growth pollen tube guidance transferase activity cell differentiation cellular nitrogen compound metabolic process growth locomotion choline biosynthetic process small molecule metabolic process post-embryonic root development anatomical structure development |
| GRMZM2G056612 | -0.322316535       | 3.937569415              | 0.02790537  | 1   | Ser/Thr_dual-sp_kinase_dom Prot_kinase_dom Ser/Thr_kinase_AS Kinase-like_dom Protein_kinase_ATP_BS                                                               | molecular_function protein kinase activity protein serine/threonine kinase activity calcium ion binding ATP binding cellular protein modification process protein phosphorylation biological_process kinase activity transferase activity, transferring phosphorus-containing groups ion binding                                                                                                                                                                                                                                                                                                    |
| GRMZM2G046681 | -0.430272148       | 3.452866029              | 0.02797513  | 1   | MFS MFS_dom_general_subst_transpt MFS_dom                                                                                                                        | molecular_function inorganic phosphate transmembrane transporter activity cellular_component intracellular cell cytoplasm transport biological_process chloroplast plastid chloroplast envelope integral component of membrane transmembrane transporter activity organelle transmembrane transport                                                                                                                                                                                                                                                                                                 |
| GRMZM2G120047 | -0.572967104       | 4.80304653               | 0.028031523 | 1   | Proteasome_sua/b Proteasome_asu_N Proteasome_suaA-type                                                                                                           | proteasome complex molecular_function endopeptidase activity threonine-type endopeptidase activity cellular_component intracellular cell nucleus cytoplasm vacuole cytosol proteasome core complex ribosome proteolysis ubiquitin-dependent protein catabolic process biological_process peptidase activity catabolic process hydrolase activity proteasome core complex, alpha-subunit complex cytosolic ribosome organelle protein complex response to cadmium ion proteolysis involved in cellular protein catabolic process                                                                     |
| GRMZM2G145063 | -0.535371127       | 5.503725248              | 0.028047294 | 1   | Peptidase_M28                                                                                                                                                    | molecular_function proteolysis biological_process peptidase activity                                                                                                                                                                                                                                                                                                                                                                                                                                                                                                                                |
| GRMZM2G047851 | -2.273244919       | -0.876291198             | 0.028053167 | 1   | Cdc6_C_dom                                                                                                                                                       | Not Annotated                                                                                                                                                                                                                                                                                                                                                                                                                                                                                                                                                                                       |
| GRMZM5G830932 | -0.476555549       | 3.397557935              | 0.028066819 | 1   | RNA_pol_sigma70 RNA_pol_sigma70_r3 RNA_pol_sigma70_r2 RNA_pol_sigma70_r4 RNA_pol_sigma_r3_r4 RNA_pol_sigma_r2 RNA_pol_sigma70_dom RNA_pol_sigma_SigB/C/D_plastid | protein binding transcription factor activity nucleic acid binding transcription factor activity molecular_function DNA binding sequence-specific DNA binding transcription factor activity DNA-templated transcription, initiation regulation of transcription, DNA-templated biological_process biosynthetic process sigma factor activity cellular nitrogen compound metabolic process plastid sigma factor activity DNA-directed RNA polymerase activity cellular response to light stimulus regulation of RNA biosynthetic process                                                             |
| GRMZM2G023946 | -0.737995417       | 2.220225281              | 0.028102713 | 1   | DUF1624                                                                                                                                                          | Not Annotated                                                                                                                                                                                                                                                                                                                                                                                                                                                                                                                                                                                       |

| Gene          | log2 (fold change) | log2 (count per million) | P-value     | FDR | Interpro                                             | GO                                                                                                                                                                                                                                                                                                                                                                                                                                                                                                                                                                                                     |
|---------------|--------------------|--------------------------|-------------|-----|------------------------------------------------------|--------------------------------------------------------------------------------------------------------------------------------------------------------------------------------------------------------------------------------------------------------------------------------------------------------------------------------------------------------------------------------------------------------------------------------------------------------------------------------------------------------------------------------------------------------------------------------------------------------|
| GRMZM2G071626 | -0.459673257       | 3.96727008               | 0.02813311  | 1   | Mediator_Med11                                       | protein binding transcription factor activity RNA polymerase II transcription cofactor activity molecular_function cellular_component intracellular cell nucleus nucleoplasm regulation of transcription from RNA polymerase II promoter biological_process mediator complex organelle protein complex                                                                                                                                                                                                                                                                                                 |
| GRMZM2G112030 | -6.306344777       | -1.637543974             | 0.028151587 | 1   | Cyt_b/b6_N Cyt_b/b6_C Di-haem_cyt_TM                 | molecular_function cellular_component intracellular cell cytoplasm mitochondrion mitochondrial inner membrane mitochondrial respiratory chain complex III generation of precursor metabolites and energy mitochondrial electron transport, ubiquinol to cytochrome c ubiquinol-cytochrome-c reductase activity biological_process electron carrier activity membrane integral component of membrane oxidoreductase activity transmembrane transporter activity electron transport chain respiratory electron transport chain ion binding organelle protein complex metal ion binding respiratory chain |
| GRMZM2G058039 | -0.361672009       | 5.823374326              | 0.028244415 | 1   | RRM_dom                                              | molecular_function nucleic acid binding                                                                                                                                                                                                                                                                                                                                                                                                                                                                                                                                                                |
| GRMZM2G128809 | -0.518331333       | 3.423674577              | 0.028244751 | 1   | RRM_dom                                              | nucleotide binding molecular_function nucleic acid binding                                                                                                                                                                                                                                                                                                                                                                                                                                                                                                                                             |
| GRMZM2G001853 | 0.426996331        | 4.291772553              | 0.0282895   | 1   | Not Annotated                                        | Not Annotated                                                                                                                                                                                                                                                                                                                                                                                                                                                                                                                                                                                          |
| GRMZM5G823629 | -0.412758153       | 4.473676776              | 0.028299084 | 1   | Tpt_PEP_trans_dom UAA                                | Golgi membrane molecular_function nucleotide-sugar transmembrane transporter activity cellular_component intracellular cell cytoplasm Golgi apparatus plasma membrane transport biological_process nucleotide-sugar transport membrane integral component of membrane transmembrane transporter activity organelle transmembrane transport                                                                                                                                                                                                                                                             |
| GRMZM2G005844 | -0.742272614       | 2.546426419              | 0.028302381 | 1   | DNA_methylase_N6_a_denine_CS MT-A70-like             | molecular_function nucleic acid binding nucleobase-containing compound metabolic process biological_process methyltransferase activity methylation cellular nitrogen compound metabolic process                                                                                                                                                                                                                                                                                                                                                                                                        |
| GRMZM2G488726 | -2.425390406       | -1.215854047             | 0.028302735 | 1   | Not Annotated                                        | Not Annotated                                                                                                                                                                                                                                                                                                                                                                                                                                                                                                                                                                                          |
| GRMZM2G408598 | -0.619735802       | 4.143571725              | 0.028371703 | 1   | ARM-type_fold IPI1/TEX10                             | molecular_function binding                                                                                                                                                                                                                                                                                                                                                                                                                                                                                                                                                                             |
| GRMZM2G119411 | -0.31904299        | 4.999938316              | 0.028450059 | 1   | Peptidase_M28                                        | molecular_function endoplasmic reticulum proteolysis biological_process peptidase activity                                                                                                                                                                                                                                                                                                                                                                                                                                                                                                             |
| GRMZM2G162093 | -1.393065149       | 0.518050204              | 0.028688634 | 1   | Not Annotated                                        | Not Annotated                                                                                                                                                                                                                                                                                                                                                                                                                                                                                                                                                                                          |
| GRMZM2G054378 | -0.920543216       | 2.560231495              | 0.028713191 | 1   | tRNA_(Gua-N7)_MeTrfase Coatomer clathrin_app_Ig-like | molecular_function structural molecule activity cellular_component intracellular cell cytoplasm Golgi apparatus Golgi-associated vesicle tRNA metabolic process tRNA modification transport intracellular protein transport biological_process methyltransferase activity tRNA (guanine-N7)-methyltransferase activity cytoplasmic membrane-bounded vesicle vesicle-mediated transport cellular nitrogen compound metabolic process organelle RNA (guanine-N7)-methylation                                                                                                                             |
| GRMZM5G831887 | -0.652290106       | 2.159088018              | 0.028717195 | 1   | HATPase_ATP-bd Heat_shock_protein_90_CS Hsp90_N      | molecular_function ATP binding protein folding response to stress biological_process unfolded protein binding                                                                                                                                                                                                                                                                                                                                                                                                                                                                                          |
| GRMZM2G050460 | -0.510117126       | 5.366934231              | 0.028756102 | 1   | Ribosomal_L7Ae/L30e/S12e/Gad45 Ribosomal_L30e_CS     | molecular_function structural constituent of ribosome structural molecule activity cellular_component intracellular cell cytoplasm cytosol ribosome translation biological_process biosynthetic process cytosolic large ribosomal subunit cytosolic ribosome organelle                                                                                                                                                                                                                                                                                                                                 |

| Gene          | log2 (fold change) | log2 (count per million) | P-value     | FDR | Interpro                                                                                           | GO                                                                                                                                                                                                                                                                                                                                                                                                         |
|---------------|--------------------|--------------------------|-------------|-----|----------------------------------------------------------------------------------------------------|------------------------------------------------------------------------------------------------------------------------------------------------------------------------------------------------------------------------------------------------------------------------------------------------------------------------------------------------------------------------------------------------------------|
| GRMZM2G001799 | -0.865551734       | 2.147125338              | 0.028879713 | 1   | AUX_IAA AuxIAA_ARF_dimer                                                                           | molecular_function cellular_component intracellular cell nucleus transcription, DNA-templated regulation of transcription, DNA-templated signal transduction biological_process biosynthetic process auxin-activated signaling pathway cellular nitrogen compound metabolic process organelle protein dimerization activity                                                                                |
| GRMZM2G003979 | -0.499647231       | 5.075091189              | 0.028924356 | 1   | Znf_RING                                                                                           | molecular_function protein binding zinc ion binding ion binding                                                                                                                                                                                                                                                                                                                                            |
| GRMZM2G115564 | -0.530752432       | 2.731752825              | 0.028948413 | 1   | DNA_dir_Rpol_phage-type                                                                            | molecular_function DNA binding DNA-directed RNA polymerase activity cellular_component intracellular cell cytoplasm mitochondrion transcription, DNA-templated biological_process biosynthetic process transferase activity nucleotidyltransferase activity cellular nitrogen compound metabolic process organelle                                                                                         |
| GRMZM2G078274 | -1.013952119       | 3.098220605              | 0.028951218 | 1   | B3_DNA-bd AUX_IAA Auxin_resp AuxIAA_ARF_dimer DNA-bd_pseudobarrel                                  | binding cellular_component intracellular cell nucleus transcription, DNA-templated regulation of transcription, DNA-templated signal transduction biological_process biosynthetic process response to hormone response to auxin auxin-activated signaling pathway flower development cellular nitrogen compound metabolic process organelle protein dimerization activity anatomical structure development |
| GRMZM2G129448 | -0.696285168       | 1.940774706              | 0.029121686 | 1   | ENT_N                                                                                              | Not Annotated                                                                                                                                                                                                                                                                                                                                                                                              |
| GRMZM2G148913 | -0.716580694       | 3.98359893               | 0.029263428 | 1   | Lipase_3                                                                                           | molecular_function triglyceride lipase activity lipid metabolic process biological_process hydrolase activity                                                                                                                                                                                                                                                                                              |
| GRMZM2G094168 | -0.973103309       | 1.396806405              | 0.029368659 | 1   | DUF597                                                                                             | Not Annotated                                                                                                                                                                                                                                                                                                                                                                                              |
| GRMZM2G052206 | -0.4695928         | 3.563374019              | 0.029410562 | 1   | Ser/Thr_dual-sp_kinase_dom Prot_kinase_dom Ser/Thr_kinase_AS Kinase-like_dom Protein_kinase_ATP_BS | molecular_function protein kinase activity protein serine/threonine kinase activity ATP binding cellular protein modification process protein phosphorylation biological_process kinase activity transferase activity, transferring phosphorus-containing groups nucleotide binding                                                                                                                        |
| GRMZM2G130043 | -0.530529945       | 3.39492301               | 0.029423583 | 1   | Starch_synth_cat_dom                                                                               | Not Annotated                                                                                                                                                                                                                                                                                                                                                                                              |
| GRMZM2G041258 | 0.492958986        | 5.552021681              | 0.029532105 | 1   | DUF538                                                                                             | Not Annotated                                                                                                                                                                                                                                                                                                                                                                                              |
| GRMZM2G110997 | -3.817350266       | 4.153506563              | 0.029596493 | 1   | Not Annotated                                                                                      | Not Annotated                                                                                                                                                                                                                                                                                                                                                                                              |
| GRMZM2G337819 | -0.598873653       | 2.566486178              | 0.029602711 | 1   | Reg_chr_condens RCC1/BLIP-II                                                                       | Not Annotated                                                                                                                                                                                                                                                                                                                                                                                              |
| GRMZM2G027331 | -0.298436195       | 4.517888414              | 0.029616422 | 1   | HAD-like_dom                                                                                       | cellular_component intracellular cell cytoplasm chloroplast plastid chloroplast stroma organelle                                                                                                                                                                                                                                                                                                           |
| GRMZM2G467717 | -0.375073071       | 3.364052018              | 0.029656703 | 1   | ARM-type_fold                                                                                      | molecular_function binding                                                                                                                                                                                                                                                                                                                                                                                 |
| GRMZM2G047791 | -0.589135226       | 2.279655198              | 0.029722351 | 1   | Not Annotated                                                                                      | Not Annotated                                                                                                                                                                                                                                                                                                                                                                                              |
| GRMZM2G400961 | -1.456245974       | 0.280202917              | 0.029742205 | 1   | Not Annotated                                                                                      | Not Annotated                                                                                                                                                                                                                                                                                                                                                                                              |
| GRMZM2G506602 | -1.333639536       | 4.810977108              | 0.02976832  | 1   | Not Annotated                                                                                      | Not Annotated                                                                                                                                                                                                                                                                                                                                                                                              |
| GRMZM2G081822 | -1.010426162       | 0.715266881              | 0.02994943  | 1   | a-crystallin/Hsp20_dom HSP20-like_chaperone                                                        | Not Annotated                                                                                                                                                                                                                                                                                                                                                                                              |
| GRMZM2G122941 | -1.123588479       | 1.159991867              | 0.029959758 | 1   | Not Annotated                                                                                      | Not Annotated                                                                                                                                                                                                                                                                                                                                                                                              |
| GRMZM5G825935 | -0.97988874        | 2.254788952              | 0.029998349 | 1   | Not Annotated                                                                                      | Not Annotated                                                                                                                                                                                                                                                                                                                                                                                              |
| GRMZM2G133746 | -1.099816294       | 1.247377187              | 0.030008306 | 1   | Not Annotated                                                                                      | Not Annotated                                                                                                                                                                                                                                                                                                                                                                                              |
| GRMZM2G475349 | 1.188637462        | 2.120206658              | 0.030181051 | 1   | Not Annotated                                                                                      | Not Annotated                                                                                                                                                                                                                                                                                                                                                                                              |

| Gene             | log2 (fold change) | log2 (count per million) | P-value     | FDR | Interpro                                                                                                                                                       | GO                                                                                                                                                                                                                                                                                                                                                                                                                                                                                                                                                                                                                                                                                                      |
|------------------|--------------------|--------------------------|-------------|-----|----------------------------------------------------------------------------------------------------------------------------------------------------------------|---------------------------------------------------------------------------------------------------------------------------------------------------------------------------------------------------------------------------------------------------------------------------------------------------------------------------------------------------------------------------------------------------------------------------------------------------------------------------------------------------------------------------------------------------------------------------------------------------------------------------------------------------------------------------------------------------------|
| GRMZM2G109560    | -0.517937907       | 4.689640552              | 0.030184315 | 1   | Lon_bac/euk-<br>typ ATPase_AAA_core<br> AAA+_ATPase Pept_S<br>16_N Peptidase_S16_<br>AS Pept_S16_C PUA-<br>like_domain Ribosoma<br>l_S5_D2-<br>typ_fold ClpA/B | nucleotide binding molecular_function ATP-dependent peptidase activity serine-type endopeptidase activity ATP binding cellular_component intracellular cell cytoplasm peroxisome peroxisomal matrix protein complex assembly proteolysis misfolded or incompletely synthesized protein catabolic process protein targeting transport biological_process peptidase activity serine-type peptidase activity catabolic process protein import into peroxisome matrix, docking hydrolase activity ATPase activity nucleoside-triphosphatase activity cellular component assembly growth organelle organelle lumen lateral root development anatomical structure development macromolecular complex assembly |
| GRMZM2G117971    | -5.559918443       | -2.083657087             | 0.030230817 | 1   | Barwin RlpA-<br>like_DPBB Barwin_CS                                                                                                                            | immune system process response to stress biological_process response to virus systemic acquired resistance response to salt stress response to ethylene defense response to fungus, incompatible interaction defense response to bacterium defense response to fungus response to herbivore                                                                                                                                                                                                                                                                                                                                                                                                             |
| GRMZM2G072526    | -0.359978661       | 4.219052965              | 0.03026237  | 1   | Glyco_hydro_17 X8 Glycoside_hydrolase_SF                                                                                                                       | molecular_function catalytic activity hydrolase activity, hydrolyzing O-glycosyl compounds carbohydrate metabolic process biological_process hydrolase activity hydrolase activity, acting on glycosyl bonds                                                                                                                                                                                                                                                                                                                                                                                                                                                                                            |
| AC202435.3_FG003 | -5.446987515       | -1.881023278             | 0.030278026 | 1   | PEstase_dom                                                                                                                                                    | molecular_function hydrolase activity                                                                                                                                                                                                                                                                                                                                                                                                                                                                                                                                                                                                                                                                   |
| GRMZM5G879527    | -0.444780914       | 3.079041264              | 0.030281321 | 1   | bHLH_dom                                                                                                                                                       | molecular_function protein dimerization activity                                                                                                                                                                                                                                                                                                                                                                                                                                                                                                                                                                                                                                                        |
| GRMZM5G846314    | 2.099808753        | -0.841055317             | 0.030295044 | 1   | Not Annotated                                                                                                                                                  | Not Annotated                                                                                                                                                                                                                                                                                                                                                                                                                                                                                                                                                                                                                                                                                           |
| GRMZM2G462422    | -0.504064852       | 2.642254646              | 0.030422496 | 1   | Not Annotated                                                                                                                                                  | Not Annotated                                                                                                                                                                                                                                                                                                                                                                                                                                                                                                                                                                                                                                                                                           |
| GRMZM2G451147    | -0.828745997       | 0.315020738              | 0.030531732 | 1   | Prot_kinase_dom Ser/<br>Thr_kinase_AS Kinase-<br>like_dom Protein_kina<br>se_ATP_BS                                                                            | nucleotide binding molecular_function protein kinase activity protein serine/threonine kinase activity ATP binding cellular protein modification process protein phosphorylation biological_process kinase activity transferase activity, transferring phosphorus-containing groups                                                                                                                                                                                                                                                                                                                                                                                                                     |
| GRMZM2G113662    | -4.170716704       | -1.141019883             | 0.030587668 | 1   | Not Annotated                                                                                                                                                  | Not Annotated                                                                                                                                                                                                                                                                                                                                                                                                                                                                                                                                                                                                                                                                                           |
| GRMZM2G430675    | -0.759240358       | 1.12001882               | 0.030662988 | 1   | AAA+_ATPase ABC_transporter-<br>like ABC_transporter-<br>CS                                                                                                    | nucleotide binding molecular_function ATP binding plasma membrane ATPase activity nucleoside-triphosphatase activity                                                                                                                                                                                                                                                                                                                                                                                                                                                                                                                                                                                    |
| GRMZM2G062577    | 0.405563286        | 5.358346526              | 0.030665349 | 1   | Lipase_GDSL                                                                                                                                                    | molecular_function lipid metabolic process biological_process hydrolase activity hydrolase activity, acting on ester bonds                                                                                                                                                                                                                                                                                                                                                                                                                                                                                                                                                                              |
| GRMZM2G165383    | -0.318729213       | 5.447289099              | 0.030777691 | 1   | SerB HAD-<br>SF_hydro_IB_PSP-<br>like HAD-like_dom                                                                                                             | molecular_function phosphoserine phosphatase activity cellular_component intracellular cell cytoplasm cellular amino acid metabolic process L-serine biosynthetic process biological_process metabolic process biosynthetic process chloroplast plastid pollen development embryo development dephosphorylation phosphatase activity organelle small molecule metabolic process root development                                                                                                                                                                                                                                                                                                        |
| GRMZM5G854146    | 3.125330034        | -1.015790968             | 0.030777902 | 1   | Ribosomal_L2_bac/org-<br>type Translation_prot<br>_SH3-<br>like Ribosomal_L2_C <br>Ribosomal_L2_CS                                                             | molecular_function RNA binding structural constituent of ribosome structural molecule activity cellular_component intracellular cell cytoplasm mitochondrion ribosome translation biological_process biosynthetic process chloroplast plastid large ribosomal subunit membrane transferase activity organelle                                                                                                                                                                                                                                                                                                                                                                                           |

| Gene             | log2 (fold change) | log2 (count per million) | P-value     | FDR | Interpro                                                                              | GO                                                                                                                                                                                                                                                                                                                                                                                                                                                                                                                                                                                                                                                                          |
|------------------|--------------------|--------------------------|-------------|-----|---------------------------------------------------------------------------------------|-----------------------------------------------------------------------------------------------------------------------------------------------------------------------------------------------------------------------------------------------------------------------------------------------------------------------------------------------------------------------------------------------------------------------------------------------------------------------------------------------------------------------------------------------------------------------------------------------------------------------------------------------------------------------------|
|                  |                    |                          |             |     |                                                                                       | molecular_function cellular_component intracellular cell cytoplasm endoplasmic reticulum lipid metabolic process fatty acid biosynthetic process unsaturated fatty acid biosynthetic process response to stress biological_process biosynthetic process response to temperature stimulus response to cold chloroplast plastid chloroplast envelope oxidoreductase activity oxidoreductase activity, acting on paired donors, with oxidation of a pair of donors resulting in the reduction of molecular oxygen to two molecules of water omega-3 fatty acid desaturase activity organelle small molecule metabolic process oxidation-reduction process response to karrikin |
| GRMZM2G129209    | -1.062102084       | 1.763980355              | 0.030858023 |     | Fatty_acid_desaturase-1 DUF3474                                                       |                                                                                                                                                                                                                                                                                                                                                                                                                                                                                                                                                                                                                                                                             |
| GRMZM2G180639    | -0.833859849       | 1.39282643               | 0.030863259 |     | 1 RRM_dom                                                                             | nucleotide binding molecular_function nucleic acid binding                                                                                                                                                                                                                                                                                                                                                                                                                                                                                                                                                                                                                  |
|                  |                    |                          |             |     |                                                                                       | nucleic acid binding transcription factor activity molecular_function DNA binding sequence-specific DNA binding transcription factor activity regulation of transcription, DNA-templated biological_process sequence-specific DNA binding                                                                                                                                                                                                                                                                                                                                                                                                                                   |
| GRMZM2G425920    | -0.73010241        | 2.502724014              | 0.030877386 |     | 1 bZIP                                                                                |                                                                                                                                                                                                                                                                                                                                                                                                                                                                                                                                                                                                                                                                             |
| GRMZM2G433117    | -0.47421032        | 3.999839247              | 0.03095964  |     | 1 Not Annotated                                                                       | Not Annotated                                                                                                                                                                                                                                                                                                                                                                                                                                                                                                                                                                                                                                                               |
| GRMZM2G133483    | -5.66464753        | -1.523922095             | 0.030987376 |     | 1 Not Annotated                                                                       | Not Annotated                                                                                                                                                                                                                                                                                                                                                                                                                                                                                                                                                                                                                                                               |
| GRMZM2G454189    | -1.368096432       | 0.448317737              | 0.031106108 |     | 1 Not Annotated                                                                       | Not Annotated                                                                                                                                                                                                                                                                                                                                                                                                                                                                                                                                                                                                                                                               |
| GRMZM2G367459    | -1.368096432       | 0.448317774              | 0.03111113  |     | 1 Not Annotated                                                                       | Not Annotated                                                                                                                                                                                                                                                                                                                                                                                                                                                                                                                                                                                                                                                               |
|                  |                    |                          |             |     | JAB_MPN_dom USP8_dimer                                                                | molecular_function protein binding                                                                                                                                                                                                                                                                                                                                                                                                                                                                                                                                                                                                                                          |
| GRMZM2G075690    | -0.480114234       | 4.875093499              | 0.031153137 |     | 1 dimer                                                                               | cellular_component intracellular cell cytoplasm endoplasmic reticulum organelle protein complex ER membrane protein complex                                                                                                                                                                                                                                                                                                                                                                                                                                                                                                                                                 |
| AC203424.3_FG001 | -0.413923296       | 4.652725934              | 0.031304362 |     | 1 DUF1620                                                                             |                                                                                                                                                                                                                                                                                                                                                                                                                                                                                                                                                                                                                                                                             |
|                  |                    |                          |             |     | Ribosomal_L2_bac/org-type Translation_prot_SH3-like Ribosomal_L2_C Ribosomal_L2_CS    | molecular_function RNA binding structural constituent of ribosome structural molecule activity cellular_component intracellular cell cytoplasm ribosome translation biological_process biosynthetic process large ribosomal subunit transferase activity organelle                                                                                                                                                                                                                                                                                                                                                                                                          |
| GRMZM2G343713    | -6.885217933       | -1.381808902             | 0.031340644 |     | 1 Ribosomal_L2_CS                                                                     |                                                                                                                                                                                                                                                                                                                                                                                                                                                                                                                                                                                                                                                                             |
|                  |                    |                          |             |     | Endo/exonuclease/phosphatase                                                          | Not Annotated                                                                                                                                                                                                                                                                                                                                                                                                                                                                                                                                                                                                                                                               |
| GRMZM2G034430    | -0.437161173       | 4.689248992              | 0.031347879 |     | 1 sptatase                                                                            | cellular_component intracellular cell cytoplasm mitochondrion vacuole vacuolar membrane endoplasmic reticulum Golgi apparatus plasma membrane response to stress biological_process response to heat response to cold response to light stimulus plasmodesma hyperosmotic salinity response organelle                                                                                                                                                                                                                                                                                                                                                                       |
| GRMZM2G072034    | -1.121027976       | 0.695645954              | 0.031356017 |     | 1 Lipocln_cytosolic_FABD_dom Calycin-like Lipocalin_ApoD Lipocalin_CS                 |                                                                                                                                                                                                                                                                                                                                                                                                                                                                                                                                                                                                                                                                             |
| GRMZM5G847302    | -5.446987515       | -1.886161656             | 0.031446996 |     | 1 Not Annotated                                                                       | Not Annotated                                                                                                                                                                                                                                                                                                                                                                                                                                                                                                                                                                                                                                                               |
|                  |                    |                          |             |     |                                                                                       | molecular_function ion binding metal ion binding cellular_component intracellular cell cytoplasm vacuole biological_process detection of gravity gravitropism amyoplast organization plant type vacuole membrane negative gravitropism organelle                                                                                                                                                                                                                                                                                                                                                                                                                            |
| GRMZM2G318860    | -0.481627977       | 3.715947906              | 0.031559215 |     | 1 DDHD                                                                                |                                                                                                                                                                                                                                                                                                                                                                                                                                                                                                                                                                                                                                                                             |
|                  |                    |                          |             |     | WD40_repeat WD40_repeat_dom WD40_repeat_CS G-protein_beta_WD40_rep Histone-bd_RBBP4_N | molecular_function protein binding cellular_component intracellular cell nucleus organelle protein complex Cul4-RING ubiquitin ligase complex cytosol                                                                                                                                                                                                                                                                                                                                                                                                                                                                                                                       |
| GRMZM2G032711    | -0.327107337       | 4.237565613              | 0.031573319 |     | 1                                                                                     |                                                                                                                                                                                                                                                                                                                                                                                                                                                                                                                                                                                                                                                                             |
|                  |                    |                          |             |     | Aminotrans_V/Cys_dSase PyrdxIP-dep_Trfase                                             | molecular_function catalytic activity biological_process metabolic process pyridoxal phosphate binding                                                                                                                                                                                                                                                                                                                                                                                                                                                                                                                                                                      |
| GRMZM2G059700    | -0.541247344       | 3.788284333              | 0.031591854 |     | 1                                                                                     |                                                                                                                                                                                                                                                                                                                                                                                                                                                                                                                                                                                                                                                                             |

| Gene          | log2 (fold change) | log2 (count per million) | P-value     | FDR | Interpro                                                                | GO                                                                                                                                                                                                                                                                                                                                                                              |
|---------------|--------------------|--------------------------|-------------|-----|-------------------------------------------------------------------------|---------------------------------------------------------------------------------------------------------------------------------------------------------------------------------------------------------------------------------------------------------------------------------------------------------------------------------------------------------------------------------|
| GRMZM2G017365 | -0.604445371       | 3.401041304              | 0.03185294  |     | 1 Cation_efflux                                                         | molecular_function cellular_component transport cation transport biological_process cation transmembrane transporter activity integral component of membrane transmembrane transporter activity transmembrane transport response to nematode                                                                                                                                    |
| GRMZM2G041167 | -5.762285887       | -1.901853826             | 0.032197047 |     | 1 Shpingomyelin_synth-like_dom                                          | Not Annotated                                                                                                                                                                                                                                                                                                                                                                   |
| GRMZM2G516387 | -0.674029381       | 4.041165153              | 0.032257231 |     | 1 Not Annotated                                                         | Not Annotated                                                                                                                                                                                                                                                                                                                                                                   |
| GRMZM5G814771 | 2.6737445          | 1.117846892              | 0.032266358 |     | 1 Not Annotated                                                         | Not Annotated                                                                                                                                                                                                                                                                                                                                                                   |
| GRMZM2G031802 | -0.412180391       | 5.021248124              | 0.032288306 |     | 1 ER_ret_rcpt                                                           | immune system process molecular_function cellular_component intracellular cell cytoplasm endoplasmic reticulum Golgi apparatus protein retention in ER lumen transport signal transduction biological_process defense response signaling pathway, resistance gene-independent protein transport membrane integral component of membrane organelle ER retention sequence binding |
| GRMZM2G034811 | -1.016422836       | 1.552031192              | 0.032307992 |     | 1 RNA-helicase_DEAD-box_CS DNA/RNA_helicase_DEAD/DEAH_N Helicase_ATP-bd | molecular_function nucleic acid binding helicase activity ATP binding ATP-dependent helicase activity biological_process FMN binding oxidoreductase activity ATPase activity oxidation-reduction process                                                                                                                                                                        |
| GRMZM2G062197 | -0.89695234        | 4.483606892              | 0.032366357 |     | 1 Pyrophosphatase                                                       | magnesium ion binding molecular_function inorganic diphosphatase activity cellular_component intracellular cell cytoplasm phosphate-containing compound metabolic process biological_process ion binding                                                                                                                                                                        |
| GRMZM2G462080 | -1.100801487       | 1.704453245              | 0.032387565 |     | 1 Not Annotated                                                         | Not Annotated                                                                                                                                                                                                                                                                                                                                                                   |
| GRMZM2G092916 | -1.38776329        | 1.264035691              | 0.032408561 |     | 1 TBP                                                                   | molecular_function DNA binding DNA-templated transcription, initiation biological_process biosynthetic process cellular nitrogen compound metabolic process                                                                                                                                                                                                                     |
| GRMZM2G419852 | -5.190552506       | -2.027025911             | 0.032477348 |     | 1 DUF966 DHR-1_domain                                                   | Not Annotated                                                                                                                                                                                                                                                                                                                                                                   |
| GRMZM2G037343 | 1.476372342        | 0.690781521              | 0.032482261 |     | 1 Cation/H_exchanger                                                    | molecular_function cellular_component transport cation transport biological_process solute:hydrogen antiporter activity integral component of membrane transmembrane transporter activity transmembrane transport                                                                                                                                                               |
| GRMZM5G897604 | -0.571097585       | 3.000879579              | 0.03267419  |     | 1 Not Annotated                                                         | Not Annotated                                                                                                                                                                                                                                                                                                                                                                   |
| GRMZM2G092991 | -0.630292969       | 3.633449288              | 0.032737044 |     | 1 Mg_trans_NIPA                                                         | molecular_function cellular_component plasma membrane transport biological_process magnesium ion transmembrane transporter activity magnesium ion transport membrane transmembrane transporter activity                                                                                                                                                                         |
| GRMZM5G892247 | 2.76106725         | 2.101634538              | 0.032757157 |     | 1 RNA_po1_Rpb1_5 RNA_po1_Rpb1_4 DNA-dir_RpoC2_beta_pp                   | molecular_function DNA binding DNA-directed RNA polymerase activity cellular_component intracellular cell cytoplasm transcription, DNA-templated biological_process biosynthetic process chloroplast plastid transferase activity nucleotidyltransferase activity cellular nitrogen compound metabolic process organelle                                                        |
| GRMZM2G386923 | -1.096771699       | 2.236732571              | 0.032760352 |     | 1 Rcd1                                                                  | Not Annotated                                                                                                                                                                                                                                                                                                                                                                   |
| GRMZM2G029531 | -0.877428517       | 1.052212826              | 0.032775181 |     | 1 Not Annotated                                                         | Not Annotated                                                                                                                                                                                                                                                                                                                                                                   |



| Gene          | log2 (fold change) | log2 (count per million) | P-value     | FDR | Interpro                                                              | GO                                                                                                                                                                                                                                                                                                                                                                                                                                                                                                                                                                                                                         |
|---------------|--------------------|--------------------------|-------------|-----|-----------------------------------------------------------------------|----------------------------------------------------------------------------------------------------------------------------------------------------------------------------------------------------------------------------------------------------------------------------------------------------------------------------------------------------------------------------------------------------------------------------------------------------------------------------------------------------------------------------------------------------------------------------------------------------------------------------|
| GRMZM2G060163 | -0.982634733       | 4.72536617               | 0.03280052  |     | RNR_small Ferritin-like_SF                                            | molecular_function ribonucleoside-diphosphate reductase activity, thioresoxin disulfide as acceptor cellular_component intracellular cell cytoplasm ribonucleoside-diphosphate reductase complex DNA metabolic process DNA replication multicellular organismal development biological_process cell death biosynthetic process deoxyribonucleoside diphosphate metabolic process programmed cell death oxidoreductase activity cellular nitrogen compound metabolic process ion binding protein complex small molecule metabolic process transition metal ion binding regulation of cell cycle oxidation-reduction process |
| GRMZM2G094083 | -0.739379478       | 4.412149167              | 0.032807592 |     | Cyclophilin-like_PP1ase_dom                                           | molecular_function RNA binding translation initiation factor activity translation translational initiation translation factor activity, nucleic acid binding biological_process biosynthetic process protein peptidyl-prolyl isomerization peptidyl-prolyl cis-trans isomerase activity protein folding cellular protein modification process isomerase activity                                                                                                                                                                                                                                                           |
| GRMZM2G091449 | -0.747734232       | 3.965290506              | 0.032813489 |     | Cleavage/polyA-sp_fac_asu_C                                           | molecular_function nucleic acid binding cellular_component intracellular cell nucleus organelle                                                                                                                                                                                                                                                                                                                                                                                                                                                                                                                            |
| GRMZM2G397661 | -3.46008794        | -1.72955567              | 0.032876881 |     | 1 Not Annotated                                                       | peroxisome                                                                                                                                                                                                                                                                                                                                                                                                                                                                                                                                                                                                                 |
| GRMZM2G009080 | -1.337526977       | -0.3079385               | 0.032986098 |     | 1 DUF581                                                              | Not Annotated                                                                                                                                                                                                                                                                                                                                                                                                                                                                                                                                                                                                              |
| GRMZM5G806638 | 2.694379503        | 2.066431709              | 0.033026204 |     | 1 Not Annotated                                                       | Not Annotated                                                                                                                                                                                                                                                                                                                                                                                                                                                                                                                                                                                                              |
| GRMZM2G110531 | -0.483794075       | 2.751101518              | 0.033140058 |     | MATH BTB/POZ-like TRAF-like BTB/POZ_fold BTB_POZ                      | molecular_function protein binding                                                                                                                                                                                                                                                                                                                                                                                                                                                                                                                                                                                         |
| GRMZM5G857930 | -0.702488402       | 2.539662592              | 0.033142809 |     | Telomer_end-bd_POT1/Cdc13 NA-bd_OB-fold                               | nuclear chromosome telomere maintenance nuclear chromosome, telomeric region molecular_function DNA binding cellular_component intracellular cell nucleus chromosome DNA metabolic process biological_process cellular nitrogen compound metabolic process homeostatic process organelle chromosome organization                                                                                                                                                                                                                                                                                                           |
| GRMZM2G146097 | -6.170663056       | -0.638088269             | 0.033165879 |     | 1 Gic/ribitol_DH                                                      | Not Annotated                                                                                                                                                                                                                                                                                                                                                                                                                                                                                                                                                                                                              |
| GRMZM2G007715 | -0.31468058        | 4.315175746              | 0.033168224 |     | Peptidase_M16_C L-Aspartase-like Metalloenz_LuxS/M16 Fumarate_lyase_N | molecular_function catalytic activity ion binding metal ion binding                                                                                                                                                                                                                                                                                                                                                                                                                                                                                                                                                        |
| GRMZM2G048117 | -0.375760482       | 5.199593993              | 0.033199459 |     | 1 DUF846_euk                                                          | cellular_component trans-Golgi network Golgi organization protein secretion unidimensional cell growth integral component of membrane                                                                                                                                                                                                                                                                                                                                                                                                                                                                                      |
| GRMZM2G118766 | -0.672629259       | 2.335935255              | 0.033325511 |     | 1 Not Annotated                                                       | Not Annotated                                                                                                                                                                                                                                                                                                                                                                                                                                                                                                                                                                                                              |
| GRMZM2G066538 | -2.867979965       | -0.792225402             | 0.03337042  |     | 1 Not Annotated                                                       | Not Annotated                                                                                                                                                                                                                                                                                                                                                                                                                                                                                                                                                                                                              |
| GRMZM2G096171 | -1.095300868       | 1.766477944              | 0.033394791 |     | Sig_transdc_resp_reg_receiver CheY-like_superfamily                   | phosphorelay response regulator activity phosphorelay signal transduction system molecular_function signal transducer activity regulation of transcription, DNA-templated signal transduction biological_process intracellular signal transduction                                                                                                                                                                                                                                                                                                                                                                         |
| GRMZM2G133943 | -0.252945305       | 3.912211825              | 0.033432686 |     | PLipase_D/transphosphatidylase C2_dom PLipase_D_C                     | molecular_function catalytic activity protein binding biological_process metabolic process                                                                                                                                                                                                                                                                                                                                                                                                                                                                                                                                 |

| Gene             | log2 (fold change) | log2 (count per million) | P-value     | FDR | Interpro                                                              | GO                                                                                                                                                                                                                                                                                                                                                                                                                                                                                                                      |
|------------------|--------------------|--------------------------|-------------|-----|-----------------------------------------------------------------------|-------------------------------------------------------------------------------------------------------------------------------------------------------------------------------------------------------------------------------------------------------------------------------------------------------------------------------------------------------------------------------------------------------------------------------------------------------------------------------------------------------------------------|
| AC196475.3_FG004 | 1.280048931        | 4.231255215              | 0.033659469 |     | O_MeTrfase_2 Plant_MeTrfase_dimerisation1 COMT De-COase2_CS           | molecular_function cellular_component intracellular cell nucleus cytoplasm plasma membrane biological_process methyltransferase activity O-methyltransferase activity biosynthetic process phenylpropanoid biosynthetic process lignin biosynthetic process transferase activity secondary metabolic process quercetin 3-O-methyltransferase activity methylation myricetin 3'-O-methyltransferase activity organelle protein dimerization activity caffeate O-methyltransferase activity flavonol biosynthetic process |
| GRMZM2G113476    | -0.572357677       | 3.244527783              | 0.033672952 |     | UbiA_prenyltransferase1e                                              | molecular_function prenyltransferase activity cellular_component integral component of membrane transferase activity transferase activity, transferring alkyl or aryl (other than methyl) groups plastid chloroplast envelope plastoquinone biosynthetic process homogentisate farnesyltransferase activity homogentisate geranylgeranyltransferase activity homogentisate solanesyltransferase activity carotenoid biosynthetic process                                                                                |
| GRMZM2G461948    | -0.548105461       | 3.882075625              | 0.03368838  |     | 1 HECT                                                                | molecular_function ubiquitin-protein ligase activity cellular_component intracellular cell cellular protein modification process biological_process ligase activity                                                                                                                                                                                                                                                                                                                                                     |
| GRMZM2G086294    | -0.94016996        | 12.40761968              | 0.033828878 |     | 1 Not Annotated                                                       | molecular_function cellular_component intracellular cell cytoplasm vacuole cytoplasmic membrane-bounded vesicle aleurone grain organelle nutrient reservoir activity                                                                                                                                                                                                                                                                                                                                                    |
| GRMZM2G381933    | -0.715825306       | 3.914879245              | 0.03390227  |     | PAPS_reduct Mopterin-bd_dom1                                          | molecular_function catalytic activity Mo-molybdopterin cofactor biosynthetic process biological_process metabolic process biosynthetic process cellular nitrogen compound metabolic process cofactor metabolic process                                                                                                                                                                                                                                                                                                  |
| GRMZM2G010740    | -1.342687958       | 0.466147246              | 0.03397766  |     | 1 VWF_A                                                               | molecular_function protein binding                                                                                                                                                                                                                                                                                                                                                                                                                                                                                      |
| GRMZM2G045507    | -0.515217712       | 2.4579871                | 0.03404221  |     | 1 Not Annotated                                                       | Not Annotated                                                                                                                                                                                                                                                                                                                                                                                                                                                                                                           |
| AC208346.3_FG004 | 2.33381893         | 0.163910803              | 0.034044879 |     | Exo70 Cullin_repeat-like_dom1                                         | exocyst cellular_component intracellular cell cytoplasm transport exocytosis biological_process vesicle-mediated transport protein complex                                                                                                                                                                                                                                                                                                                                                                              |
| GRMZM2G107651    | -0.722433286       | 1.520225114              | 0.034058171 |     | 1 DENN_dom                                                            | Not Annotated                                                                                                                                                                                                                                                                                                                                                                                                                                                                                                           |
| GRMZM5G814310    | -0.340357023       | 5.793636691              | 0.03424436  |     | 1 Not Annotated                                                       | endoplasmic reticulum                                                                                                                                                                                                                                                                                                                                                                                                                                                                                                   |
| GRMZM2G055437    | -1.342687958       | 0.432973551              | 0.034315322 |     | WD40_repeat WD40_repeat_dom WD40_repeat_CS G-protein_beta_WD-140_rep1 | molecular_function protein binding                                                                                                                                                                                                                                                                                                                                                                                                                                                                                      |
| GRMZM2G121063    | -0.441872305       | 5.709497568              | 0.034351799 |     | 1 K+_transporter                                                      | plant-type vacuole molecular_function cellular_component intracellular cell cytoplasm vacuole vacuolar membrane plasma membrane transport biological_process potassium ion transmembrane transporter activity membrane transmembrane transporter activity organelle transmembrane transport potassium ion transmembrane transport                                                                                                                                                                                       |

| Gene          | log2 (fold change) | log2 (count per million) | P-value     | FDR | Interpro                                                                                             | GO                                                                                                                                                                                                                                                                                                                                                                                                                                                                                                                                                                                                                                                                                                                                                                                                                                                                                                         |
|---------------|--------------------|--------------------------|-------------|-----|------------------------------------------------------------------------------------------------------|------------------------------------------------------------------------------------------------------------------------------------------------------------------------------------------------------------------------------------------------------------------------------------------------------------------------------------------------------------------------------------------------------------------------------------------------------------------------------------------------------------------------------------------------------------------------------------------------------------------------------------------------------------------------------------------------------------------------------------------------------------------------------------------------------------------------------------------------------------------------------------------------------------|
| GRMZM2G162748 | -0.426257106       | 5.684275519              | 0.034395025 |     | Rieske_Fe-S_prot_C Cyt_b6-f_cplx_Fe-S_su Rieske_2Fe-2S                                               | molecular_function cellular_component intracellular cell cytoplasm plasma membrane generation of precursor metabolites and energy response to stress ubiquinol-cytochrome-c reductase activity biological_process plastoquinol--plastocyanin reductase activity chloroplast chloroplast thylakoid plastid thylakoid chloroplast envelope nonphotochemical quenching photosynthesis membrane integral component of membrane oxidoreductase activity oxidoreductase activity, acting on diphenols and related substances as donors transmembrane transporter activity electron transport chain thylakoid membrane defense response to bacterium ion binding organelle electron transporter, transferring electrons within cytochrome b6/f complex of photosystem II activity metal ion binding iron-sulfur cluster binding 2 iron, 2 sulfur cluster binding oxidation-reduction process response to karrikin |
| GRMZM2G073026 | -5.446987515       | -2.089364341             | 0.034598124 |     | Ribosomal_L5 Ribosomal_L5_domain                                                                     | molecular_function structural constituent of ribosome structural molecule activity cellular_component intracellular cell cytoplasm vacuole ribosome translation biological_process biosynthetic process membrane cytosolic large ribosomal subunit cytosolic ribosome organelle                                                                                                                                                                                                                                                                                                                                                                                                                                                                                                                                                                                                                            |
| GRMZM5G842695 | -0.409508032       | 2.973877167              | 0.034617391 |     | 1 MATE                                                                                               | molecular_function cellular_component transport drug transmembrane transport biological_process drug transmembrane transporter activity antiporter activity membrane transmembrane transporter activity transmembrane transport                                                                                                                                                                                                                                                                                                                                                                                                                                                                                                                                                                                                                                                                            |
| GRMZM2G034947 | -0.5539882         | 2.809927632              | 0.034651853 |     | 1 Znf_GRF                                                                                            | molecular_function zinc ion binding ion binding                                                                                                                                                                                                                                                                                                                                                                                                                                                                                                                                                                                                                                                                                                                                                                                                                                                            |
| GRMZM2G142875 | -0.538207274       | 4.507157383              | 0.034679797 |     | 1 DUF566                                                                                             | Not Annotated                                                                                                                                                                                                                                                                                                                                                                                                                                                                                                                                                                                                                                                                                                                                                                                                                                                                                              |
| GRMZM5G864414 | -0.621885537       | 5.95199965               | 0.034687526 |     | 1 Ser/Thr_dual-sp_kinase_dom Prot_kinase_dom Ser/Thr_kinase_AS Kinase-like_dom Protein_kinase_ATP_BS | nucleotide binding molecular_function protein kinase activity protein serine/threonine kinase activity ATP binding cellular protein modification process protein phosphorylation biological_process kinase activity transferase activity, transferring phosphorus-containing groups                                                                                                                                                                                                                                                                                                                                                                                                                                                                                                                                                                                                                        |
| GRMZM2G590771 | 0.928190612        | 2.579569744              | 0.034862971 |     | 1 Not Annotated                                                                                      | Not Annotated                                                                                                                                                                                                                                                                                                                                                                                                                                                                                                                                                                                                                                                                                                                                                                                                                                                                                              |
| GRMZM2G176474 | -0.734455239       | 3.981747097              | 0.035010448 |     | 1 Not Annotated                                                                                      | Not Annotated                                                                                                                                                                                                                                                                                                                                                                                                                                                                                                                                                                                                                                                                                                                                                                                                                                                                                              |
| GRMZM2G046436 | -0.675500431       | 3.769998434              | 0.035016866 |     | 1 RGP_fam                                                                                            | molecular_function carbohydrate metabolic process biological_process biosynthetic process isomerase activity intramolecular transferase activity cellulose biosynthetic process                                                                                                                                                                                                                                                                                                                                                                                                                                                                                                                                                                                                                                                                                                                            |
| GRMZM2G512616 | -1.467034179       | -0.56346846              | 0.035032279 |     | 1 Not Annotated                                                                                      | Not Annotated                                                                                                                                                                                                                                                                                                                                                                                                                                                                                                                                                                                                                                                                                                                                                                                                                                                                                              |
| GRMZM2G041039 | 2.139445598        | -1.907573821             | 0.03516087  |     | 1 Not Annotated                                                                                      | Not Annotated                                                                                                                                                                                                                                                                                                                                                                                                                                                                                                                                                                                                                                                                                                                                                                                                                                                                                              |
| GRMZM2G101060 | -2.55584726        | 0.415680846              | 0.035301856 |     | 1 F-box_dom                                                                                          | molecular_function protein binding                                                                                                                                                                                                                                                                                                                                                                                                                                                                                                                                                                                                                                                                                                                                                                                                                                                                         |
| GRMZM2G547542 | -0.180216883       | 4.384928905              | 0.035427045 |     | 1 Spermidine/spermine_synthase Methyltransferase_11                                                  | molecular_function catalytic activity biological_process metabolic process methyltransferase activity methylation                                                                                                                                                                                                                                                                                                                                                                                                                                                                                                                                                                                                                                                                                                                                                                                          |
| GRMZM2G354834 | -0.871745122       | 1.411305566              | 0.035441878 |     | 1 Not Annotated                                                                                      | Not Annotated                                                                                                                                                                                                                                                                                                                                                                                                                                                                                                                                                                                                                                                                                                                                                                                                                                                                                              |
| GRMZM5G876520 | -0.487304845       | 5.2358218                | 0.035550852 |     | 1 Not Annotated                                                                                      | origin recognition complex molecular_function DNA binding ATP binding cellular_component intracellular cell nucleus chromosome DNA metabolic process DNA replication biological_process biosynthetic process cellular nitrogen compound metabolic process identical protein binding organelle protein complex                                                                                                                                                                                                                                                                                                                                                                                                                                                                                                                                                                                              |
| GRMZM2G581326 | -2.379055769       | -0.905775865             | 0.035599026 |     | 1 Not Annotated                                                                                      | Not Annotated                                                                                                                                                                                                                                                                                                                                                                                                                                                                                                                                                                                                                                                                                                                                                                                                                                                                                              |
| GRMZM2G397391 | 2.082631722        | -0.744142419             | 0.035629817 |     | 1 Glycosyltransferase_AE1                                                                            | molecular_function transferase activity, transferring glycosyl groups                                                                                                                                                                                                                                                                                                                                                                                                                                                                                                                                                                                                                                                                                                                                                                                                                                      |

| Gene          | log2 (fold change) | log2 (count per million) | P-value     | FDR | Interpro                                                                                                                           | GO                                                                                                                                                                                                                                                                                                                                                                                                                                                                                                                                                                               |
|---------------|--------------------|--------------------------|-------------|-----|------------------------------------------------------------------------------------------------------------------------------------|----------------------------------------------------------------------------------------------------------------------------------------------------------------------------------------------------------------------------------------------------------------------------------------------------------------------------------------------------------------------------------------------------------------------------------------------------------------------------------------------------------------------------------------------------------------------------------|
| GRMZM2G148896 | -0.580669223       | 3.76330161               | 0.035691943 | 1   | Thiaminase-2/PQQC Haem_Oase-like_multi-hlx HAD-like_dom                                                                            | Not Annotated                                                                                                                                                                                                                                                                                                                                                                                                                                                                                                                                                                    |
| GRMZM2G106974 | -0.465018133       | 4.892160268              | 0.035716575 | 1   | Valyl-tRNA_ligase aa-tRNA-synth_la Val/Leu/Ile-tRNA-synth_edit tRNAsynth_1a_anticodon-bd tRNA-bd_arm V/L/I-tRNA-synth_anticodon-bd | nucleotide binding aminoacyl-tRNA editing activity  molecular_function aminoacyl-tRNA ligase activity valine-tRNA binding cellular_component intracellular cell cytoplasm mitochondrion cytosol tRNA metabolic process translation tRNA aminoacylation for protein translation valyl-tRNA aminoacylation regulation of translational fidelity cellular amino acid metabolic process biological_process biosynthetic process chloroplast embryo development ending in seed dormancy ligase activity cellular nitrogen compound metabolic process small molecule metabolic process |
| GRMZM2G456603 | 1.782222137        | 2.094716251              | 0.035749082 | 1   | NADH_UbQ_OxRdtase_su10                                                                                                             | cellular_component intracellular cell cytoplasm mitochondrion mitochondrial respiratory chain complex I mitochondrial membrane organelle protein complex respiratory chain complex I                                                                                                                                                                                                                                                                                                                                                                                             |
| GRMZM5G831795 | -0.591562113       | 2.470666702              | 0.035819922 | 1   | Peptidase_M20 Peptidase_M20_dimer Amidohydrolase                                                                                   | molecular_function biological_process metabolic process hydrolase activity                                                                                                                                                                                                                                                                                                                                                                                                                                                                                                       |
| GRMZM2G446170 | 1.009033139        | 0.976588536              | 0.035834097 | 1   | BURP_dom                                                                                                                           | Not Annotated                                                                                                                                                                                                                                                                                                                                                                                                                                                                                                                                                                    |
| GRMZM2G082180 | -0.512776404       | 1.98923858               | 0.035845502 | 1   | Small_GTP-bd_dom GTPase_MnmE GTP_binding_domain GTP-bd_TrmE_N GTPase_MnmE_C_dom                                                    | nucleotide binding  molecular_function GTPase activity GTP binding cellular_component intracellular cell GTP catabolic process tRNA metabolic process tRNA modification tRNA processing biological_process catabolic process cellular nitrogen compound metabolic process nucleobase-containing compound catabolic process small molecule metabolic process                                                                                                                                                                                                                      |
| GRMZM2G121826 | -0.383271915       | 4.16709997               | 0.035901991 | 1   | Ser-Thr/Tyr_kinase_cat_dom Prot_kinase_dom Kinase-like_dom                                                                         | molecular_function protein kinase activity ATP binding cellular_component cell plasma membrane cellular protein modification process protein phosphorylation biological_process kinase activity transferase activity, transferring phosphorus-containing groups                                                                                                                                                                                                                                                                                                                  |
| GRMZM2G129399 | 1.77046045         | 0.789706989              | 0.035912115 | 1   | HeavyMe-assoc_HMA                                                                                                                  | molecular_function transport biological_process metal ion transport ion binding metal ion binding                                                                                                                                                                                                                                                                                                                                                                                                                                                                                |
| GRMZM2G167999 | -0.448615329       | 5.266570989              | 0.036046461 | 1   | WD40_repeat WD40_repeat_dom WD40_repeat_CS G-protein_beta_WD40_rep DUF3337                                                         | molecular_function protein binding lateral root formation                                                                                                                                                                                                                                                                                                                                                                                                                                                                                                                        |
| GRMZM2G158069 | -0.621890846       | 1.965385754              | 0.036172779 | 1   | Smr/MutS2_C DUF1771                                                                                                                | cytoplasm                                                                                                                                                                                                                                                                                                                                                                                                                                                                                                                                                                        |
| GRMZM2G162388 | -0.560295886       | 6.416033319              | 0.036233207 | 1   | Cyclophilin-like_PPase_dom Cyclophilin-type_PPase_CS Cyclophilin-type_PPase                                                        | protein peptidyl-prolyl isomerization  molecular_function peptidyl-prolyl cis-trans isomerase activity cytosol plasma membrane protein folding cellular protein modification process biological_process isomerase activity                                                                                                                                                                                                                                                                                                                                                       |
| GRMZM2G140016 | -0.415057468       | 3.206170167              | 0.036234115 | 1   | Znf_C2H2 Znf_C2H2-like                                                                                                             | molecular_function nucleic acid binding cellular_component intracellular cell zinc ion binding ion binding sequence-specific DNA binding                                                                                                                                                                                                                                                                                                                                                                                                                                         |

| Gene          | log2 (fold change) | log2 (count per million) | P-value     | FDR | Interpro                                                                                                                                                                      | GO                                                                                                                                                                                                                                                                                                                                                                                                                                                                                                                                                                                                                                                                                                                                                                                                                                                                                                                                                                                                                                                                                |
|---------------|--------------------|--------------------------|-------------|-----|-------------------------------------------------------------------------------------------------------------------------------------------------------------------------------|-----------------------------------------------------------------------------------------------------------------------------------------------------------------------------------------------------------------------------------------------------------------------------------------------------------------------------------------------------------------------------------------------------------------------------------------------------------------------------------------------------------------------------------------------------------------------------------------------------------------------------------------------------------------------------------------------------------------------------------------------------------------------------------------------------------------------------------------------------------------------------------------------------------------------------------------------------------------------------------------------------------------------------------------------------------------------------------|
| GRMZM2G451792 | -1.298872964       | 0.654153707              | 0.036236278 | 1   | AAA+_ATPase ABC_transporter-like ABC_2_trans PDR_assoc ABC_transporter_CS                                                                                                     | nucleotide binding molecular_function ATP binding cellular_component ATP catabolic process biological_process catabolic process membrane ATPase activity nucleoside-triphosphatase activity cellular nitrogen compound metabolic process nucleobase-containing compound catabolic process small molecule metabolic process                                                                                                                                                                                                                                                                                                                                                                                                                                                                                                                                                                                                                                                                                                                                                        |
| GRMZM2G113415 | -0.578169723       | 3.696593169              | 0.036301092 | 1   | Not Annotated                                                                                                                                                                 | Not Annotated                                                                                                                                                                                                                                                                                                                                                                                                                                                                                                                                                                                                                                                                                                                                                                                                                                                                                                                                                                                                                                                                     |
| GRMZM2G158252 | -0.926048637       | 1.51812897               | 0.036348834 | 1   | Sig_transdc_His_kinlike_C EnvZ-like_dim/P HATPase_ATP-bd Sig_transdc_resp-reg_receiver Sig_transdc_His_kinase_core CHASE Sig_transdc_His_kinase_dimeric CheY-like_superfamily | phosphorelay sensor kinase activity phosphorelay response regulator activity phosphorelay signal transduction system molecular_function signal transducer activity osmosensor activity ATP binding cellular_component regulation of transcription, DNA-templated response to stress response to osmotic stress signal transduction biological_process response to water deprivation response to toxic substance response to salt stress response to abscisic acid regulation of flower development regulation of seed germination phloem or xylem histogenesis regulation of chlorophyll catabolic process membrane kinase activity phosphorylation transferase activity, transferring phosphorus-containing groups kinase binding signal transduction by phosphorylation negative regulation of iron ion transport intracellular signal transduction identical protein binding protein histidine kinase binding regulation of meristem development regulation of shoot system development cellular response to cold cellular response to abscisic acid stimulus secondary growth |
| GRMZM2G016447 | -0.712691513       | 5.301539747              | 0.036386031 | 1   | Not Annotated                                                                                                                                                                 | Not Annotated                                                                                                                                                                                                                                                                                                                                                                                                                                                                                                                                                                                                                                                                                                                                                                                                                                                                                                                                                                                                                                                                     |
| GRMZM2G165390 | -0.750926045       | 1.940318586              | 0.036569632 | 1   | UDP_glucos_trans                                                                                                                                                              | molecular_function biological_process metabolic process biosynthetic process anthocyanin-containing compound biosynthetic process transferase activity transferase activity, transferring glycosyl groups transferase activity, transferring hexosyl groups secondary metabolic process UDP-glucosyltransferase activity anthocyanidin 3-O-glucosyltransferase activity quercetin 3-O-glucosyltransferase activity flavonol 3-O-arabinosyltransferase activity response to karrikin                                                                                                                                                                                                                                                                                                                                                                                                                                                                                                                                                                                               |
| GRMZM2G079348 | 2.101564679        | 0.260696789              | 0.03659828  | 1   | Catalase_haem_BS Catalase_immune_response Catalase_core Catalase Catalase-like_dom Catalase_AS Catalase_clade1/3                                                              | molecular_function catalase activity peroxidase activity response to stress response to oxidative stress biological_process catabolic process oxidoreductase activity heme binding hydrogen peroxide catabolic process ion binding metal ion binding oxidation-reduction process cell wall mitochondrion cellular response to nitrogen starvation response to light stimulus response to abscisic acid chloroplast envelope cellular response to sulfate starvation cellular response to phosphate starvation cytosolic ribosome response to hydrogen peroxide response to cadmium ion cobalt ion binding cellular_component intracellular cell cytoplasm organelle                                                                                                                                                                                                                                                                                                                                                                                                               |
| GRMZM2G126956 | -0.792163788       | 0.707859977              | 0.036700611 | 1   | Znf_CCHC WD40_repeat WD40_repeat_dom WD40_repeat_CS                                                                                                                           | molecular_function nucleic acid binding protein binding cellular_component intracellular cell nucleus DNA metabolic process DNA repair response to stress biological_process zinc ion binding response to UV-B cellular nitrogen compound metabolic process ion binding organelle                                                                                                                                                                                                                                                                                                                                                                                                                                                                                                                                                                                                                                                                                                                                                                                                 |
| GRMZM5G857327 | -2.330678439       | 0.026611475              | 0.036706063 | 1   | Not Annotated                                                                                                                                                                 | Not Annotated                                                                                                                                                                                                                                                                                                                                                                                                                                                                                                                                                                                                                                                                                                                                                                                                                                                                                                                                                                                                                                                                     |
| GRMZM5G819140 | -1.299631648       | 0.610075338              | 0.036896686 | 1   | Not Annotated                                                                                                                                                                 | Not Annotated                                                                                                                                                                                                                                                                                                                                                                                                                                                                                                                                                                                                                                                                                                                                                                                                                                                                                                                                                                                                                                                                     |
| GRMZM5G881996 | -0.554682316       | 3.787419408              | 0.036929265 | 1   | Sec63-dom Ig_E-set                                                                                                                                                            | Not Annotated                                                                                                                                                                                                                                                                                                                                                                                                                                                                                                                                                                                                                                                                                                                                                                                                                                                                                                                                                                                                                                                                     |
| GRMZM2G095254 | 0.906237631        | 0.273074831              | 0.036980956 | 1   | ATPase_AAA_CS ATPase_AAA_core AAA+_ATPase AAA_N_dom                                                                                                                           | nucleotide binding molecular_function ATP binding nucleoside-triphosphatase activity                                                                                                                                                                                                                                                                                                                                                                                                                                                                                                                                                                                                                                                                                                                                                                                                                                                                                                                                                                                              |

| Gene          | log2 (fold change) | log2 (count per million) | P-value     | FDR | Interpro                                                                                                                                        | GO                                                                                                                                                                                                                                                                                                                                                                                         |
|---------------|--------------------|--------------------------|-------------|-----|-------------------------------------------------------------------------------------------------------------------------------------------------|--------------------------------------------------------------------------------------------------------------------------------------------------------------------------------------------------------------------------------------------------------------------------------------------------------------------------------------------------------------------------------------------|
| GRMZM2G434696 | -0.508056024       | 4.912097202              | 0.036981455 | 1   | WD40_repeat_dom WD40_repeat Synaptobrevin                                                                                                       | molecular_function protein binding cellular_component plasma membrane transport biological_process integral component of membrane vesicle-mediated transport                                                                                                                                                                                                                               |
| GRMZM2G306345 | -0.283539757       | 10.76383198              | 0.037105529 | 1   | PPDK_PEP-bd PEP_util_C PEP_util_enz_mobile_dom Pyruvate_phosphate_dikinase Pyrv/PenolPyrv_Kinase-like_dom PEP_util_AS PEP_util_CS               | molecular_function catalytic activity ATP binding nucleus cytosol pyruvate metabolic process biological_process chloroplast stroma kinase activity phosphorylation transferase activity, transferring phosphorus-containing groups small molecule metabolic process pyruvate, phosphate dikinase activity                                                                                  |
| GRMZM5G840560 | -0.322970439       | 5.845757724              | 0.037149377 | 1   | Glyco_trans_48                                                                                                                                  | 1,3-beta-D-glucan synthase complex molecular_function 1,3-beta-D-glucan synthase activity cellular_component cell plasma membrane carbohydrate metabolic process (1->3)-beta-D-glucan biosynthetic process biological_process biosynthetic process membrane transferase activity, transferring glycosyl groups protein complex                                                             |
| GRMZM2G119175 | -0.398514141       | 7.317363586              | 0.037281129 | 1   | Pyr_Kinase Pyrv_Kinase-like_insert_dom Pyrv_Kinase_brl Pyrv_Kinase_C Pyrv/PenolPyrv_Kinase-like_dom                                             | magnesium ion binding molecular_function catalytic activity pyruvate kinase activity cellular_component cell cytosol plasma membrane carbohydrate metabolic process generation of precursor metabolites and energy glycolysis biological_process catabolic process membrane kinase activity phosphorylation transferase activity potassium ion binding ion binding response to cadmium ion |
| GRMZM2G054210 | -0.503265996       | 4.619575496              | 0.037305231 | 1   | Clathrin/coatomer_adapt-like_N Clathrin_a/b/g-adaptin_app_lg Clathrin_g-adaptin_app Coatomer/clathrin_app_lg-like ARM-type_fold AP1_complex_gsu | molecular_function binding cellular_component intracellular cell cytoplasm Golgi apparatus transport intracellular protein transport biological_process protein transporter activity protein transport membrane vesicle-mediated transport membrane coat clathrin adaptor complex organelle protein complex Golgi apparatus part                                                           |
| GRMZM2G047255 | -0.385825364       | 3.982482352              | 0.037415434 | 1   | FH2_Formin                                                                                                                                      | Not Annotated                                                                                                                                                                                                                                                                                                                                                                              |
| GRMZM2G035098 | -0.950488664       | 0.918129476              | 0.037525863 | 1   | RIO_kinase Kinase-like_dom RIO-like_kinase                                                                                                      | molecular_function catalytic activity protein serine/threonine kinase activity ATP binding kinase activity transferase activity, transferring phosphorus-containing groups                                                                                                                                                                                                                 |
| GRMZM5G851130 | 2.119099508        | 1.276983924              | 0.037600472 | 1   | Ribosomal_S2 Stathmin_fam Ribosomal_S2_flav_dom                                                                                                 | molecular_function structural constituent of ribosome structural molecule activity cellular_component intracellular cell cytoplasm mitochondrion ribosome translation biological_process biosynthetic process small ribosomal subunit regulation of microtubule polymerization or depolymerization organelle                                                                               |
| GRMZM2G025132 | -0.440394901       | 2.315350578              | 0.037784978 | 1   | Not Annotated                                                                                                                                   | Not Annotated                                                                                                                                                                                                                                                                                                                                                                              |
| GRMZM2G022310 | -0.394015671       | 4.397479176              | 0.037816291 | 1   | Glyco_trans_1 PIGA_GPI_anchor_biosynthesis                                                                                                      | cellular protein modification process GPI anchor biosynthetic process lipid metabolic process biological_process biosynthetic process                                                                                                                                                                                                                                                      |
| GRMZM2G120833 | 1.770546462        | -0.578650485             | 0.037893769 | 1   | Thr_synthase_like Trp_syn_b_sub_like_PLP_eny_SF Ser/Thr_deHydrtase_PyrdxlP-B5                                                                   | molecular_function cellular amino acid metabolic process biological_process pyridoxal phosphate binding small molecule metabolic process                                                                                                                                                                                                                                                   |
| GRMZM5G883100 | -1.749582807       | -1.311614241             | 0.037899042 | 1   | Not Annotated                                                                                                                                   | Not Annotated                                                                                                                                                                                                                                                                                                                                                                              |
| GRMZM2G590885 | -1.986178083       | 0.12891193               | 0.037913733 | 1   | Not Annotated                                                                                                                                   | Not Annotated                                                                                                                                                                                                                                                                                                                                                                              |

| Gene          | log2 (fold change) | log2 (count per million) | P-value     | FDR | Interpro                                                                                                    | GO                                                                                                                                                                                                                                                                                                                                                                                                                                             |
|---------------|--------------------|--------------------------|-------------|-----|-------------------------------------------------------------------------------------------------------------|------------------------------------------------------------------------------------------------------------------------------------------------------------------------------------------------------------------------------------------------------------------------------------------------------------------------------------------------------------------------------------------------------------------------------------------------|
| GRMZM2G350658 | 2.731571738        | -0.803350503             | 0.037974576 | 1   | PSS                                                                                                         | cellular amino acid metabolic process lipid metabolic process phosphatidylserine biosynthetic process biological_process biosynthetic process small molecule metabolic process                                                                                                                                                                                                                                                                 |
| GRMZM2G415433 | -0.333141694       | 3.933371494              | 0.03800249  | 1   | FH2_Formin                                                                                                  | cellular_component intracellular cell nucleus organelle                                                                                                                                                                                                                                                                                                                                                                                        |
| GRMZM5G869635 | -1.122351933       | -0.140025957             | 0.038141502 | 1   | F-box_dom                                                                                                   | molecular_function protein binding                                                                                                                                                                                                                                                                                                                                                                                                             |
| GRMZM2G475882 | -0.839694375       | 1.819999095              | 0.038220915 | 1   | AUX_IAA Auxin_resp AuxIAA_ARF_dimer DNA-bd_pseudobarrel                                                     | reproduction molecular_function DNA binding cellular_component intracellular cell nucleus transcription, DNA-templated regulation of transcription, DNA-templated signal transduction biological_process biosynthetic process response to hormone response to auxin auxin-activated signaling pathway flower development cellular nitrogen compound metabolic process organelle protein dimerization activity anatomical structure development |
| GRMZM2G118183 | 1.979319474        | -1.238079257             | 0.038373029 | 1   | Not Annotated                                                                                               | Not Annotated                                                                                                                                                                                                                                                                                                                                                                                                                                  |
| GRMZM5G873675 | -1.488830761       | 0.531385239              | 0.038432505 | 1   | Not Annotated                                                                                               | Not Annotated                                                                                                                                                                                                                                                                                                                                                                                                                                  |
| GRMZM2G058568 | -0.499948289       | 3.200387814              | 0.038444074 | 1   | Not Annotated                                                                                               | Not Annotated                                                                                                                                                                                                                                                                                                                                                                                                                                  |
| GRMZM2G155837 | -0.701833719       | 2.601487047              | 0.038463459 | 1   | Ser-Thr/Tyr_kinase_cat_dom Prot_kinase_dom Kinase-like_dom Protein_kinase_ATP_BS Malectin Ser/Thr_kinase_AS | molecular_function protein kinase activity ATP binding cellular protein modification process protein phosphorylation biological_process kinase activity phosphorylation transferase activity, transferring phosphorus-containing groups nucleotide binding protein serine/threonine kinase activity                                                                                                                                            |
| GRMZM2G086403 | -1.030346581       | 1.068951555              | 0.038498066 | 1   | DUF597                                                                                                      | Not Annotated                                                                                                                                                                                                                                                                                                                                                                                                                                  |
| GRMZM2G046025 | -0.303673602       | 4.869051652              | 0.03857926  | 1   | Yip1                                                                                                        | cellular_component cell endosome Golgi apparatus trans-Golgi network cytosol plasma membrane membrane                                                                                                                                                                                                                                                                                                                                          |
| GRMZM2G466281 | -0.239695601       | 5.494697328              | 0.038609291 | 1   | CDP-OH_P_trans CHOPT                                                                                        | molecular_function cellular_component Golgi apparatus lipid metabolic process biological_process phospholipid biosynthetic process biosynthetic process membrane transferase activity phosphotransferase activity, for other substituted phosphate groups                                                                                                                                                                                      |
| GRMZM2G097736 | -2.39938158        | 0.356783606              | 0.038623107 | 1   | Not Annotated                                                                                               | Not Annotated                                                                                                                                                                                                                                                                                                                                                                                                                                  |
| GRMZM2G031628 | -0.800035641       | 3.122700889              | 0.0386463   | 1   | Glyco_hydro_1 Glycoside_hydrolase_SF                                                                        | molecular_function catalytic activity hydrolase activity, hydrolyzing O-glycosyl compounds carbohydrate metabolic process biological_process hydrolase activity, acting on glycosyl bonds                                                                                                                                                                                                                                                      |
| GRMZM2G038801 | 1.188201305        | 2.546602922              | 0.038765696 | 1   | HSP_DnaJ_Cys-rich_dom                                                                                       | molecular_function heat shock protein binding unfolded protein binding                                                                                                                                                                                                                                                                                                                                                                         |
| GRMZM2G371793 | 2.070942286        | -1.272788952             | 0.038775146 | 1   | Acid_phosphat_B HAD-like_dom                                                                                | molecular_function acid phosphatase activity phosphatase activity                                                                                                                                                                                                                                                                                                                                                                              |
| GRMZM2G474236 | -0.386662402       | 4.252537557              | 0.038856267 | 1   | Galactose-bd-like Rad4/PNGase_transGLS-fold                                                                 | molecular_function DNA binding damaged DNA binding cellular_component intracellular cell nucleus DNA metabolic process nucleotide-excision repair response to stress biological_process cellular nitrogen compound metabolic process organelle                                                                                                                                                                                                 |
| GRMZM5G823111 | 2.579393465        | -1.48022399              | 0.038864758 | 1   | Not Annotated                                                                                               | Not Annotated                                                                                                                                                                                                                                                                                                                                                                                                                                  |
| GRMZM2G172829 | -0.368602421       | 4.99145905               | 0.038923375 | 1   | Clp_protease_ATP-bd_su_ClpX AAA+_ATPase ATPase_AAA- Clp_ATPase_C                                            | nucleotide binding molecular_function ATP binding protein folding biological_process nucleoside-triphosphatase activity unfolded protein binding                                                                                                                                                                                                                                                                                               |
| GRMZM2G062657 | -0.440645664       | 2.615102827              | 0.039111401 | 1   | BRCT_dom GNAT_dom Acyl_CoA_acyltransferase                                                                  | molecular_function N-acetyltransferase activity transferase activity, transferring acyl groups                                                                                                                                                                                                                                                                                                                                                 |

| Gene             | log2 (fold change) | log2 (count per million) | P-value     | FDR | Interpro                                                                                                | GO                                                                                                                                                                                                                                                                                                                                                                                                                                                                                                                                                                                  |
|------------------|--------------------|--------------------------|-------------|-----|---------------------------------------------------------------------------------------------------------|-------------------------------------------------------------------------------------------------------------------------------------------------------------------------------------------------------------------------------------------------------------------------------------------------------------------------------------------------------------------------------------------------------------------------------------------------------------------------------------------------------------------------------------------------------------------------------------|
| GRMZM2G172787    | -0.682058507       | 0.73715295               | 0.039122185 | 1   | Topo_IA_DNA-bd Topo_IA_2 Topo_IA Topo_bac-type Toprim_domain Topo_IA_cen Topo_IA_core_domain Topo_IA_AS | molecular_function DNA binding DNA topoisomerase activity DNA topoisomerase type I activity cellular_component intracellular cell chromosome DNA metabolic process DNA topological change biological_process isomerase activity cellular nitrogen compound metabolic process organelle                                                                                                                                                                                                                                                                                              |
| GRMZM5G878607    | -2.139929119       | -1.259800528             | 0.039128505 | 1   | Epimerase_deHydtase                                                                                     | nucleotide binding molecular_function catalytic activity cytosol biological_process plasmodesma UDP-rhamnose biosynthetic process UDP-L-rhamnose synthase activity auxin efflux cellular metabolic process UDP-glucose 4,6-dehydratase activity coenzyme binding flavonol biosynthetic process                                                                                                                                                                                                                                                                                      |
| GRMZM2G364178    | -0.658602819       | 4.585976577              | 0.03913708  | 1   | Not Annotated                                                                                           | Not Annotated                                                                                                                                                                                                                                                                                                                                                                                                                                                                                                                                                                       |
| GRMZM2G114692    | -0.281458932       | 4.978708281              | 0.039147713 | 1   | Pumilio_RNA-bd_rpt ARM-type_fold                                                                        | molecular_function RNA binding binding cellular_component intracellular cell nucleus nucleolus organelle                                                                                                                                                                                                                                                                                                                                                                                                                                                                            |
| GRMZM2G434317    | -0.567576643       | 2.955066544              | 0.039190222 | 1   | DUF707                                                                                                  | Not Annotated                                                                                                                                                                                                                                                                                                                                                                                                                                                                                                                                                                       |
| GRMZM2G155729    | -0.527174836       | 2.79324254               | 0.039275573 | 1   | UDPGP_trans                                                                                             | molecular_function UDP-N-acetylglucosamine diphosphorylase activity UTP:glucose-1-phosphate uridylyltransferase activity cellular_component cell cytosol plasma membrane UDP-glucose metabolic process UDP-N-acetylglucosamine metabolic process biological_process metabolic process nucleotidyltransferase activity UDP-N-acetylgalactosamine metabolic process cellular nitrogen compound metabolic process small molecule metabolic process UDP-N-acetylgalactosamine diphosphorylase activity                                                                                  |
| GRMZM2G162758    | 2.783625559        | -0.985629366             | 0.03943662  | 1   | Cyt_P450_E_grp-I Cyt_P450 Cyt_P450_CS                                                                   | molecular_function monooxygenase activity iron ion binding cellular_component intracellular cell cytoplasm endoplasmic reticulum lipid metabolic process biological_process electron carrier activity biosynthetic process suberin biosynthetic process oxidoreductase activity oxidoreductase activity, acting on paired donors, with incorporation or reduction of molecular oxygen secondary metabolic process heme binding very long-chain fatty acid biosynthetic process ion binding organelle small molecule metabolic process metal ion binding oxidation-reduction process |
| GRMZM2G040326    | -0.463463557       | 5.191540654              | 0.039511931 | 1   | Peptidase_S9                                                                                            | molecular_function proteolysis biological_process peptidase activity serine-type peptidase activity                                                                                                                                                                                                                                                                                                                                                                                                                                                                                 |
| GRMZM2G565441    | -1.529695997       | 1.003792171              | 0.03951209  | 1   | Not Annotated                                                                                           | Not Annotated                                                                                                                                                                                                                                                                                                                                                                                                                                                                                                                                                                       |
| GRMZM5G867512    | 1.488448704        | 0.48697787               | 0.039515994 | 1   | Cyt_c_biogenesis_CcbS Cyt_c_biogenesis Cyt_c_assembly                                                   | molecular_function cellular_component intracellular cell cytoplasm mitochondrion protein complex assembly transport biological_process respiratory chain complex IV assembly heme transporter activity heme transport membrane cytochrome complex assembly cellular component assembly organelle macromolecular complex assembly                                                                                                                                                                                                                                                    |
| GRMZM2G347645    | -0.520931853       | 4.735504568              | 0.039532035 | 1   | Membrane_Tatp1/CMV_rcpt                                                                                 | embryo development pollen tube guidance maintenance of protein localization in endoplasmic reticulum                                                                                                                                                                                                                                                                                                                                                                                                                                                                                |
| GRMZM2G154574    | -0.643935671       | 2.867687984              | 0.039548941 | 1   | tRNA_yW-synthesising tRNA_Trfase_Trm5/Tyw2 Kelch_1                                                      | molecular_function protein binding transferase activity                                                                                                                                                                                                                                                                                                                                                                                                                                                                                                                             |
| AC213463.3_FG002 | -0.26614386        | 4.595387707              | 0.039566171 | 1   | Tscrpt_elong_fac_Eaf_N                                                                                  | cellular_component intracellular cell nucleus nucleoplasm regulation of transcription, DNA-templated biological_process ELL-EAF complex organelle protein complex                                                                                                                                                                                                                                                                                                                                                                                                                   |
| GRMZM2G098721    | -0.344868703       | 3.457639628              | 0.039570641 | 1   | Elf1                                                                                                    | Not Annotated                                                                                                                                                                                                                                                                                                                                                                                                                                                                                                                                                                       |



| Gene          | log2 (fold change) | log2 (count per million) | P-value     | FDR | Interpro                                                                                           | GO                                                                                                                                                                                                                                                                                                                                                                                                                                                                                                                                                                                                      |
|---------------|--------------------|--------------------------|-------------|-----|----------------------------------------------------------------------------------------------------|---------------------------------------------------------------------------------------------------------------------------------------------------------------------------------------------------------------------------------------------------------------------------------------------------------------------------------------------------------------------------------------------------------------------------------------------------------------------------------------------------------------------------------------------------------------------------------------------------------|
| GRMZM2G102754 | -0.573924148       | 1.782938237              | 0.039664493 | 1   | NRAMP-like                                                                                         | establishment of planar polarity response to molecule of bacterial origin molecular_function transporter activity cellular_component transport response to osmotic stress biological_process response to heat response to salt stress positive regulation of abscisic acid-activated signaling pathway auxin polar transport regulation of stomatal movement leaf senescence membrane negative regulation of defense response defense response to bacterium root hair cell differentiation defense response to fungus defense response by callose deposition in cell wall cellular response to iron ion |
| GRMZM5G861479 | -2.021807725       | 4.399155121              | 0.039668877 | 1   | Proteasome_suA-type                                                                                | molecular_function threonine-type endopeptidase activity peptidase activity                                                                                                                                                                                                                                                                                                                                                                                                                                                                                                                             |
| GRMZM2G361120 | -2.273244919       | -0.524691689             | 0.039693168 | 1   | PEP_carboxykinase_N                                                                                | molecular_function phosphoenolpyruvate carboxykinase activity carbohydrate metabolic process gluconeogenesis biological_process biosynthetic process lyase activity purine nucleotide binding                                                                                                                                                                                                                                                                                                                                                                                                           |
| GRMZM2G063262 | -0.349827123       | 4.115686265              | 0.039727385 | 1   | Not Annotated                                                                                      | Not Annotated                                                                                                                                                                                                                                                                                                                                                                                                                                                                                                                                                                                           |
| GRMZM2G136146 | -0.855487852       | 3.217549324              | 0.03986267  | 1   | Not Annotated                                                                                      | Not Annotated                                                                                                                                                                                                                                                                                                                                                                                                                                                                                                                                                                                           |
| GRMZM2G086971 | -0.554978433       | 4.639438899              | 0.039877037 | 1   | Glutathione_S-Trfase_N Thioredoxin-like_fold Small_GTP-bd_dom Small_GTPase_Rab_type Small_GTPase   | molecular_function protein binding cellular_component intracellular cell cytoplasm chloroplast plastid organelle nucleotide binding GTP binding plasma membrane transport signal transduction small GTPase mediated signal transduction biological_process protein transport membrane                                                                                                                                                                                                                                                                                                                   |
| GRMZM2G394212 | -0.824197523       | 3.601825526              | 0.039918124 | 1   | mOase_FAD-bd Rng_hydrolase-like                                                                    | Not Annotated                                                                                                                                                                                                                                                                                                                                                                                                                                                                                                                                                                                           |
| GRMZM5G899151 | -2.826521499       | -1.350659452             | 0.039923994 | 1   | Not Annotated                                                                                      | Not Annotated                                                                                                                                                                                                                                                                                                                                                                                                                                                                                                                                                                                           |
| GRMZM2G016382 | -0.474917194       | 1.688723805              | 0.040000079 | 1   | Pentatricopeptide_repeat                                                                           | Not Annotated                                                                                                                                                                                                                                                                                                                                                                                                                                                                                                                                                                                           |
| GRMZM2G007854 | -0.192689527       | 4.665499352              | 0.040048859 | 1   | Ser-Thr/Tyr_kinase_cat_dom Prot_kinase_dom Ser/Thr_kinase_AS Kinase-like_dom Protein_kinase_ATP_BS | molecular_function protein kinase activity protein serine/threonine kinase activity ATP binding cellular protein modification process protein phosphorylation biological_process kinase activity transferase activity, transferring phosphorus-containing groups                                                                                                                                                                                                                                                                                                                                        |
| GRMZM5G804708 | 1.870514762        | 0.50880231               | 0.04006658  | 1   | ClpP ClpP_AS ClpP/Te                                                                               | nucleotide binding molecular_function serine-type endopeptidase activity ATP binding cellular_component intracellular cell cytoplasm proteolysis biological_process peptidase activity serine-type peptidase activity chloroplast plastid stroma chloroplast thylakoid membrane plastid chloroplast stroma thylakoid chloroplast endopeptidase Clp complex hydrolase activity organelle protein complex                                                                                                                                                                                                 |
| GRMZM2G372928 | -0.97901813        | 0.413114693              | 0.040075875 | 1   | Znf_PHD PWWP_dom Znf_FYVE_PHD Zinc_finger_PHD-type_CS Znf_PHD-finger                               | molecular_function protein binding zinc ion binding DNA mediated transformation plasmodesma ion binding metal ion binding                                                                                                                                                                                                                                                                                                                                                                                                                                                                               |
| GRMZM5G814985 | -0.38690209        | 4.272068394              | 0.040357627 | 1   | Helicase/UvrB_dom Helicase_ATP-bd RNase_III_dom                                                    | molecular_function DNA binding ATP binding hydrolase activity RNA binding nuclease activity ribonuclease III activity RNA processing biological_process cellular nitrogen compound metabolic process                                                                                                                                                                                                                                                                                                                                                                                                    |

| Gene          | log2 (fold change) | log2 (count per million) | P-value     | FDR | Interpro                                                                                          | GO                                                                                                                                                                                                                                                                                                                                                                                                                                                                                                                                                                                                                                                             |
|---------------|--------------------|--------------------------|-------------|-----|---------------------------------------------------------------------------------------------------|----------------------------------------------------------------------------------------------------------------------------------------------------------------------------------------------------------------------------------------------------------------------------------------------------------------------------------------------------------------------------------------------------------------------------------------------------------------------------------------------------------------------------------------------------------------------------------------------------------------------------------------------------------------|
| GRMZM5G881077 | -2.710912757       | -2.215005859             | 0.0404411   | 1   | PP2C_Mn2_Asp60_BS                                                                                 | molecular_function protein serine/threonine phosphatase activity cellular protein modification process protein dephosphorylation biological_process phosphatase activity                                                                                                                                                                                                                                                                                                                                                                                                                                                                                       |
| GRMZM2G164224 | -0.8373127         | 0.952971009              | 0.040481926 | 1   | Prot_kinase_dom MSP_dom Ser/Thr_kinase_AS PapD-like Kinase-like_dom TPR-contain_dom               | molecular_function protein kinase activity protein serine/threonine kinase activity structural molecule activity protein binding ATP binding cellular protein modification process protein phosphorylation biological_process kinase activity transferase activity, transferring phosphorus-containing groups                                                                                                                                                                                                                                                                                                                                                  |
| GRMZM2G552793 | -1.257113712       | 0.644205021              | 0.040518602 | 1   | Not Annotated                                                                                     | Not Annotated                                                                                                                                                                                                                                                                                                                                                                                                                                                                                                                                                                                                                                                  |
| GRMZM5G884407 | -0.903878861       | 1.15118024               | 0.040538096 | 1   | Not Annotated                                                                                     | Not Annotated                                                                                                                                                                                                                                                                                                                                                                                                                                                                                                                                                                                                                                                  |
| GRMZM2G160430 | -1.244594024       | 1.137072301              | 0.040609678 | 1   | Sugar/inositol_transpt Sub_transporter Sugar_transporter_CS MFS_dom_general_subst_transpt MFS_dom | molecular_function transporter activity cellular_component intracellular cell cytoplasm vacuole plasma membrane transport biological_process membrane integral component of membrane transmembrane transporter activity substrate-specific transmembrane transporter activity organelle transmembrane transport                                                                                                                                                                                                                                                                                                                                                |
| GRMZM2G114772 | -1.086482148       | 0.736512483              | 0.040643924 | 1   | Glyco_trans_8                                                                                     | molecular_function transferase activity, transferring glycosyl groups                                                                                                                                                                                                                                                                                                                                                                                                                                                                                                                                                                                          |
| GRMZM2G368411 | -6.020883491       | -1.817687946             | 0.040686118 | 1   | Oxoglu/Fe-dep_dioxygenase Isopenicillin-N_synthase DIOX_N                                         | molecular_function biological_process oxidoreductase activity oxidoreductase activity, acting on paired donors, with incorporation or reduction of molecular oxygen, 2-oxoglutarate as one donor, and incorporation of one atom each of oxygen into both donors oxidation-reduction process                                                                                                                                                                                                                                                                                                                                                                    |
| GRMZM2G172800 | 2.454378154        | -0.299404566             | 0.04068656  | 1   | Pentatricopeptide_repeat                                                                          | Not Annotated                                                                                                                                                                                                                                                                                                                                                                                                                                                                                                                                                                                                                                                  |
| GRMZM2G111898 | -4.118781116       | -1.201231898             | 0.040737013 | 1   | Not Annotated                                                                                     | Not Annotated                                                                                                                                                                                                                                                                                                                                                                                                                                                                                                                                                                                                                                                  |
| GRMZM2G465046 | 2.605487928        | -1.074109877             | 0.040762962 | 1   | Lipase_GDSL                                                                                       | molecular_function lipid metabolic process biological_process hydrolase activity hydrolase activity, acting on ester bonds                                                                                                                                                                                                                                                                                                                                                                                                                                                                                                                                     |
| GRMZM2G008305 | -0.943358613       | -0.258930842             | 0.040777154 | 1   | DUF868_pln                                                                                        | Not Annotated                                                                                                                                                                                                                                                                                                                                                                                                                                                                                                                                                                                                                                                  |
| GRMZM2G077202 | -0.270396055       | 3.64582059               | 0.040909571 | 1   | Glyco_hydro_14 Glyco_side_hydrolase_SF                                                            | polysaccharide catabolic process molecular_function catalytic activity carbohydrate metabolic process biological_process catabolic process beta-amylase activity hydrolase activity, acting on glycosyl bonds                                                                                                                                                                                                                                                                                                                                                                                                                                                  |
| GRMZM2G389881 | -0.726308563       | 1.383905916              | 0.041153526 | 1   | Not Annotated                                                                                     | Not Annotated                                                                                                                                                                                                                                                                                                                                                                                                                                                                                                                                                                                                                                                  |
| GRMZM2G178960 | 0.786994657        | 2.680296447              | 0.041227263 | 1   | Ribul_P_3_epim- like RibuloseP- bd_barrel Ribul_P_3_e pim                                         | molecular_function catalytic activity ribulose-phosphate 3-epimerase activity cellular_component extracellular region intracellular cell cytoplasm carbohydrate metabolic process pentose-phosphate shunt response to stress biological_process metabolic process catabolic process response to cold chloroplast plastid chloroplast stroma thylakoid response to nematode chloroplast envelope stromule isomerase activity racemase and epimerase activity, acting on carbohydrates and derivatives cellular nitrogen compound metabolic process ion binding organelle small molecule metabolic process metal ion binding apoplast cofactor metabolic process |
| GRMZM2G022090 | -0.538703474       | 2.795207838              | 0.041268494 | 1   | Not Annotated                                                                                     | Not Annotated                                                                                                                                                                                                                                                                                                                                                                                                                                                                                                                                                                                                                                                  |
| GRMZM2G075387 | -0.285865845       | 3.838505293              | 0.041278641 | 1   | UDP_glucos_trans                                                                                  | molecular_function biological_process metabolic process transferase activity, transferring glycosyl groups transferase activity, transferring hexosyl groups                                                                                                                                                                                                                                                                                                                                                                                                                                                                                                   |

| Gene          | log2 (fold change) | log2 (count per million) | P-value     | FDR | Interpro                                                                                                              | GO                                                                                                                                                                                                                                                                                                                                                                                                                                                                                                                                                                                                                                                   |
|---------------|--------------------|--------------------------|-------------|-----|-----------------------------------------------------------------------------------------------------------------------|------------------------------------------------------------------------------------------------------------------------------------------------------------------------------------------------------------------------------------------------------------------------------------------------------------------------------------------------------------------------------------------------------------------------------------------------------------------------------------------------------------------------------------------------------------------------------------------------------------------------------------------------------|
| GRMZM2G130927 | -0.678131964       | 2.853361034              | 0.041308025 | 1   | Ser/Thr_dual-sp_kinase_dom Prot_kinase_dom Ser/Thr_kinase_AS Kinase-like_dom Protein_kinase_ATP_BS                    | MAPK cascade nucleotide binding activation of MAPKK activity molecular_function DNA binding protein kinase activity protein serine/threonine kinase activity MAP kinase kinase kinase activity signal transducer activity ATP binding cellular_component intracellular cell nucleus cellular protein modification process protein phosphorylation response to stress response to osmotic stress signal transduction biological_process response to cold response to wounding response to salt stress kinase activity transferase activity, transferring phosphorus-containing groups enzyme binding kinase binding organelle response to cadmium ion |
| GRMZM5G853305 | 2.083906771        | 1.359468029              | 0.041308044 | 1   | Ribosomal_L16 Ribosomal_L10e/L16 Ribosomal_L16_CS                                                                     | molecular_function RNA binding structural constituent of ribosome structural molecule activity cellular_component intracellular cell cytoplasm ribosome translation biological_process biosynthetic process chloroplast plastid rRNA binding ribonucleoprotein complex organelle                                                                                                                                                                                                                                                                                                                                                                     |
| GRMZM5G887345 | -0.474702361       | 4.682685158              | 0.0413354   | 1   | Not Annotated                                                                                                         | Not Annotated                                                                                                                                                                                                                                                                                                                                                                                                                                                                                                                                                                                                                                        |
| GRMZM2G314934 | -2.844820352       | -2.115746682             | 0.041481503 | 1   | Not Annotated                                                                                                         | Not Annotated                                                                                                                                                                                                                                                                                                                                                                                                                                                                                                                                                                                                                                        |
| GRMZM2G100988 | -0.920189563       | 1.478895996              | 0.041500209 | 1   | Not Annotated                                                                                                         | Not Annotated                                                                                                                                                                                                                                                                                                                                                                                                                                                                                                                                                                                                                                        |
| GRMZM2G158446 | -0.532482074       | 3.410616462              | 0.041512031 | 1   | Not Annotated                                                                                                         | Not Annotated                                                                                                                                                                                                                                                                                                                                                                                                                                                                                                                                                                                                                                        |
| GRMZM2G409430 | -0.239925187       | 3.998668074              | 0.041570334 | 1   | Nucleoporin_Nup85                                                                                                     | nuclear envelope                                                                                                                                                                                                                                                                                                                                                                                                                                                                                                                                                                                                                                     |
| GRMZM2G063647 | -1.361519041       | -1.146569737             | 0.041614451 | 1   | Not Annotated                                                                                                         | Not Annotated                                                                                                                                                                                                                                                                                                                                                                                                                                                                                                                                                                                                                                        |
| GRMZM2G091494 | -0.26145807        | 4.225359656              | 0.041622856 | 1   | Anoctamin                                                                                                             | Not Annotated                                                                                                                                                                                                                                                                                                                                                                                                                                                                                                                                                                                                                                        |
| GRMZM2G312661 | -0.710924846       | 1.360481234              | 0.041654728 | 1   | EF_hand_dom EF-hand_dom_pair EF_Hand_1_Ca_BS                                                                          | molecular_function calcium ion binding ion binding                                                                                                                                                                                                                                                                                                                                                                                                                                                                                                                                                                                                   |
| GRMZM2G124593 | -0.355668068       | 4.831334316              | 0.041668236 | 1   | Pyr_Knase Pyrv_Knase-like_insert_dom Pyrv_Knase_br Pyrv_Knase_C Pyrv/PenolPyrv_Kinase-like_dom                        | magnesium ion binding molecular_function catalytic activity pyruvate kinase activity carbohydrate metabolic process generation of precursor metabolites and energy glycolysis biological_process catabolic process kinase activity phosphorylation transferase activity potassium ion binding ion binding                                                                                                                                                                                                                                                                                                                                            |
| GRMZM2G099239 | -5.446987515       | -2.136409904             | 0.041698105 | 1   | Remorin_C                                                                                                             | Not Annotated                                                                                                                                                                                                                                                                                                                                                                                                                                                                                                                                                                                                                                        |
| GRMZM2G019621 | -0.640171775       | 2.506135721              | 0.041711585 | 1   | ATPase_AAA_CS ATPase_AAA_core AAA+_ATPase ClpA/B                                                                      | nucleotide binding molecular_function ATP binding nucleoside-triphosphatase activity                                                                                                                                                                                                                                                                                                                                                                                                                                                                                                                                                                 |
| GRMZM5G852338 | -0.764553277       | 4.378966668              | 0.041727854 | 1   | Dilute Dil_domain                                                                                                     | molecular_function protein binding                                                                                                                                                                                                                                                                                                                                                                                                                                                                                                                                                                                                                   |
| GRMZM2G151406 | -0.54426654        | 2.164961146              | 0.041744425 | 1   | Cation_transp_P_typ_ATPase ATPase_P_typ_transduc_dom_A ATPase_P_typ_P_site HAD-like_dom Cation_transp_P_typ_ATPase_IB | nucleotide binding molecular_function ATP binding cellular_component transport cation transport copper ion transport biological_process integral component of membrane hydrolase activity ATPase activity cation-transporting ATPase activity transmembrane transporter activity ion binding copper-transporting ATPase activity metal ion binding                                                                                                                                                                                                                                                                                                   |
| GRMZM2G080116 | 0.577465798        | 1.117161662              | 0.041809097 | 1   | Dynein_light_chain_typ_p-1/2                                                                                          | cellular_component intracellular cell cytoskeleton microtubule associated complex microtubule-based process biological_process organelle protein complex                                                                                                                                                                                                                                                                                                                                                                                                                                                                                             |
| GRMZM2G062453 | -2.289708685       | -1.039112221             | 0.04186766  | 1   | Glyco_trans_14 Cyclin_N Cyclin-like Cyclin_A/B/D/E                                                                    | regulation of cyclin-dependent protein serine/threonine kinase activity molecular_function cellular_component biological_process acetylglucosaminyltransferase activity membrane transferase activity, transferring glycosyl groups enzyme binding protein kinase binding regulation of cell cycle                                                                                                                                                                                                                                                                                                                                                   |

| Gene          | log2 (fold change) | log2 (count per million) | P-value     | FDR | Interpro                                                                   | GO                                                                                                                                                                                                                                                                                                                                                                                                                                                              |
|---------------|--------------------|--------------------------|-------------|-----|----------------------------------------------------------------------------|-----------------------------------------------------------------------------------------------------------------------------------------------------------------------------------------------------------------------------------------------------------------------------------------------------------------------------------------------------------------------------------------------------------------------------------------------------------------|
| GRMZM2G133660 | 1.182876815        | 3.609485938              | 0.041932274 |     | 1 Not Annotated                                                            | Not Annotated                                                                                                                                                                                                                                                                                                                                                                                                                                                   |
| GRMZM2G124718 | -0.799872984       | 2.152720729              | 0.041936814 |     | 1 Poly(ADP-ribose)pol_reg_dom Poly(ADP-ribose)pol_cat_dom                  | molecular_function NAD+ ADP-ribosyltransferase activity carbohydrate metabolic process translation cellular protein modification process protein ADP-ribosylation biological_process biosynthetic process transferase activity, transferring glycosyl groups                                                                                                                                                                                                    |
| GRMZM2G103236 | -0.522579923       | 4.642745943              | 0.042014898 |     | 1 GroES-like Chaperonin_Cpn10                                              | cellular_component intracellular cell cytoplasm protein folding biological_process chloroplast plastid chloroplast stroma chloroplast envelope organelle                                                                                                                                                                                                                                                                                                        |
| GRMZM2G100946 | -0.508119011       | 5.150068886              | 0.042017393 |     | 1 Armadillo BTB/POZ-like BTB/POZ_fold BTB_POZ ARM-type_fold                | molecular_function binding protein binding                                                                                                                                                                                                                                                                                                                                                                                                                      |
| GRMZM2G377115 | -0.282660717       | 3.790933787              | 0.042058102 |     | 1 UbiB_dom Prot_kinase_dom Kinase-like_dom                                 | molecular_function protein kinase activity ATP binding cellular protein modification process protein phosphorylation biological_process chlorophyll catabolic process kinase activity transferase activity, transferring phosphorus-containing groups response to photooxidative stress                                                                                                                                                                         |
| GRMZM2G180435 | 0.772779502        | 1.487962245              | 0.0420622   |     | 1 Not Annotated                                                            | Not Annotated                                                                                                                                                                                                                                                                                                                                                                                                                                                   |
| GRMZM2G036829 | -0.395461354       | 3.932060645              | 0.04210935  |     | 1 Split_barrel_FMN-bd DUF2470                                              | molecular_function cellular_component intracellular cell cytoplasm generation of precursor metabolites and energy biological_process chloroplast chloroplast thylakoid plastid chloroplast stroma photosynthetic electron transport chain post-embryonic development FMN binding photosynthesis oxidoreductase activity tetrapyrrole biosynthetic process organelle protein anchor oxidation-reduction process positive regulation of heme biosynthetic process |
| GRMZM2G155974 | -0.50136963        | 2.913807984              | 0.042172269 |     | 1 Glutathione_synth_subst-bd_euk Glutathione_synthase_euk PreATP-grasp_dom | molecular_function glutathione synthase activity ATP binding cellular_component intracellular cell cytoplasm cytosol cellular amino acid metabolic process glutathione biosynthetic process sulfur compound metabolic process biological_process biosynthetic process chloroplast plastid response to jasmonic acid ligase activity organelle small molecule metabolic process                                                                                  |
| GRMZM2G305332 | -0.735711046       | 2.099129879              | 0.042230771 |     | 1 Actin-related                                                            | molecular_function ATP binding cellular_component intracellular cell cytoskeleton Arp2/3 protein complex cytoskeleton organization biological_process regulation of actin filament polymerization Arp2/3 complex-mediated actin nucleation organelle protein complex cell morphogenesis actin filament organization multidimensional cell growth trichome morphogenesis cell differentiation growth anatomical structure development                            |
| GRMZM2G142964 | -0.493284794       | 2.605388863              | 0.042271488 |     | 1 JmjC_dom                                                                 | core promoter proximal region sequence-specific DNA binding molecular_function protein binding nucleus positive regulation of seed germination histone demethylase activity (H3-R2 specific) histone demethylase activity (H4-R3 specific) histone H4-R3 methylation histone H3-R2 demethylation histone H4-R3 demethylation                                                                                                                                    |
| GRMZM2G079389 | -0.250935589       | 3.6620976                | 0.042423761 |     | 1 Dymeclin                                                                 | Not Annotated                                                                                                                                                                                                                                                                                                                                                                                                                                                   |
| GRMZM2G126774 | -0.414587676       | 3.157833663              | 0.042428966 |     | 1 Helicase_C SNF2_N HARP_dom Helicase_ATP-bd                               | molecular_function nucleic acid binding DNA binding helicase activity ATP binding cellular_component intracellular cell nucleus biological_process chromatin modification organelle chromosome organization                                                                                                                                                                                                                                                     |

| Gene          | log2 (fold change) | log2 (count per million) | P-value     | FDR | Interpro                                                                                           | GO                                                                                                                                                                                                                                                                                                                                                                                                       |
|---------------|--------------------|--------------------------|-------------|-----|----------------------------------------------------------------------------------------------------|----------------------------------------------------------------------------------------------------------------------------------------------------------------------------------------------------------------------------------------------------------------------------------------------------------------------------------------------------------------------------------------------------------|
| GRMZM2G029396 | -0.231225271       | 5.288843408              | 0.042513245 |     | Squ/phyt_synthse Squal_synth Terpenoid_synth Squalene/phytoene_synthase_CS                         | molecular_function farnesyl-diphosphate farnesyltransferase activity cellular_component intracellular cell cytoplasm endoplasmic reticulum plasma membrane lipid metabolic process biological_process lipid biosynthetic process biosynthetic process integral component of membrane transferase activity transferase activity, transferring alkyl or aryl (other than methyl) groups organelle          |
| GRMZM2G058573 | -0.485365798       | 5.300315247              | 0.04262586  |     | Sirtuin Sirtuin_cat_dom                                                                            | molecular_function NAD+ binding                                                                                                                                                                                                                                                                                                                                                                          |
| GRMZM2G165746 | -0.77421556        | 1.507573735              | 0.042696641 |     | Mit_carrier Mitochondrial_sb/sol_carrier Mit_carrier_dom                                           | cellular_component transport biological_process membrane integral component of membrane transmembrane transport                                                                                                                                                                                                                                                                                          |
| GRMZM2G005061 | -0.455990243       | 3.916275385              | 0.042748867 |     | 1 Not Annotated                                                                                    | double-strand break repair via homologous recombination molecular_function double-stranded DNA binding single-stranded DNA binding nucleus mitochondrion DNA repair ion binding cobalt ion binding                                                                                                                                                                                                       |
| GRMZM2G150834 | -0.853445276       | 1.539053635              | 0.042830236 |     | SAC3/GANP/Nin1/mts13/eIF-3-p25                                                                     | Not Annotated                                                                                                                                                                                                                                                                                                                                                                                            |
| GRMZM2G121264 | -1.776278403       | -0.269066763             | 0.042852671 |     | Cyt_P450_E_grp-I Cyt_P450 Cyt_P450_CS                                                              | molecular_function monooxygenase activity iron ion binding biological_process electron carrier activity oxidoreductase activity oxidoreductase activity, acting on paired donors, with incorporation or reduction of molecular oxygen heme binding ion binding metal ion binding oxidation-reduction process                                                                                             |
| GRMZM2G302891 | -1.243381455       | -0.081958389             | 0.042861884 |     | Znf_C2H2 Znf_C2H2-like                                                                             | molecular_function cellular_component intracellular cell zinc ion binding ion binding                                                                                                                                                                                                                                                                                                                    |
| GRMZM2G386824 | -0.483761772       | 3.996727647              | 0.042881423 |     | Glycoside_Hdrlase_35 Lectin_gal-bd_dom Galactose-bd-like Glycoside_hydrolase_SF Glyco_hydro_35_CS  | molecular_function hydrolase activity, hydrolyzing O-glycosyl compounds carbohydrate metabolic process biological_process hydrolase activity, acting on glycosyl bonds carbohydrate binding                                                                                                                                                                                                              |
| GRMZM2G129413 | 0.772865605        | 2.716117533              | 0.042888474 |     | 1 AA_transpt_TM                                                                                    | cellular_component biological_process response to nematode cotyledon vascular tissue pattern formation membrane integral component of membrane root cap development anatomical structure development                                                                                                                                                                                                     |
| GRMZM2G439448 | -5.762285887       | -1.953363896             | 0.042900942 |     | 1 Remorin_C                                                                                        | Not Annotated                                                                                                                                                                                                                                                                                                                                                                                            |
| GRMZM2G117544 | -0.541800634       | 3.950735168              | 0.042902613 |     | Proteasome_sua/b Proteasome_bsu_CS Proteasome_suB-type                                             | proteasome complex molecular_function endopeptidase activity threonine-type endopeptidase activity cellular_component intracellular cell nucleus cytoplasm vacuolar membrane cytosol proteasome core complex plasma membrane proteolysis biological_process peptidase activity catabolic process hydrolase activity organelle protein complex proteolysis involved in cellular protein catabolic process |
| GRMZM2G404207 | -0.510666771       | 2.823075241              | 0.042933506 |     | Ser-Thr/Tyr_kinase_cat_dom Prot_kinase_dom Ser/Thr_kinase_AS Kinase-like_dom Protein_kinase_ATP_BS | molecular_function protein kinase activity protein serine/threonine kinase activity ATP binding cellular protein modification process protein phosphorylation biological_process kinase activity phosphorylation transferase activity, transferring phosphorus-containing groups                                                                                                                         |

| Gene          | log2 (fold change) | log2 (count per million) | P-value     | FDR | Interpro                                                                                                                              | GO                                                                                                                                                                                                                                                                                                                                                                                                                                          |
|---------------|--------------------|--------------------------|-------------|-----|---------------------------------------------------------------------------------------------------------------------------------------|---------------------------------------------------------------------------------------------------------------------------------------------------------------------------------------------------------------------------------------------------------------------------------------------------------------------------------------------------------------------------------------------------------------------------------------------|
| GRMZM5G833032 | -0.580482926       | 3.0147714                | 0.043052654 | 1   | SANT/Myb Myb_dom<br>_plants Homeodomain<br>like Myb_dom                                                                               | molecular_function DNA binding chromatin binding response to stress biological_process response to salt stress response to ethylene response to auxin response to abscisic acid response to gibberellin response to salicylic acid response to jasmonic acid response to cadmium ion                                                                                                                                                        |
| GRMZM2G456023 | -0.262339798       | 4.103267583              | 0.043066596 | 1   | START_lipid-<br>bd_dom Pleckstrin_ho<br>mology DUF1336                                                                                | molecular_function protein binding phospholipid binding lipid binding                                                                                                                                                                                                                                                                                                                                                                       |
| GRMZM2G168519 | -0.526206866       | 2.590489571              | 0.043092603 | 1   | Longin_dom Longin-<br>like_dom Synaptobrev<br>in                                                                                      | cellular_component transport biological_process membrane integral component of membrane vesicle-mediated transport                                                                                                                                                                                                                                                                                                                          |
| GRMZM2G157677 | 0.892375306        | 1.111328794              | 0.043122586 | 1   | Not Annotated                                                                                                                         | Not Annotated                                                                                                                                                                                                                                                                                                                                                                                                                               |
| GRMZM2G011655 | -0.625202435       | 2.341598123              | 0.043134068 | 1   | Squ/phyt_synthse Ter<br>penoid_synth                                                                                                  | molecular_function biological_process biosynthetic process transferase activity                                                                                                                                                                                                                                                                                                                                                             |
| GRMZM2G131476 | -0.639627722       | 3.568654842              | 0.043260781 | 1   | Leu_zip_homeo Home<br>obox_dom Homeodo<br>main-<br>like Homeobox_CS                                                                   | nucleic acid binding transcription factor activity molecular_function DNA binding sequence-specific DNA binding transcription factor activity cellular_component intracellular cell nucleus transcription, DNA-templated regulation of transcription, DNA-templated biological_process biosynthetic process response to cytokinin cellular nitrogen compound metabolic process organelle sequence-specific DNA binding                      |
| GRMZM2G033767 | -0.547671439       | 1.976120665              | 0.043293176 | 1   | Plipid/glycerol_acylTrf<br>ase                                                                                                        | molecular_function biological_process metabolic process transferase activity, transferring acyl groups                                                                                                                                                                                                                                                                                                                                      |
| GRMZM5G858653 | -0.719777406       | 3.665854905              | 0.043358304 | 1   | ALMT                                                                                                                                  | transport biological_process malate transport                                                                                                                                                                                                                                                                                                                                                                                               |
| GRMZM2G004349 | -0.416689939       | 4.265785083              | 0.043396777 | 1   | Reticulon                                                                                                                             | cellular_component intracellular cell cytoplasm endoplasmic reticulum organelle                                                                                                                                                                                                                                                                                                                                                             |
| GRMZM2G174048 | 1.972526441        | -0.645844524             | 0.043406105 | 1   | Plcyanin-<br>like Cupredoxin                                                                                                          | molecular_function copper ion binding electron carrier activity ion binding                                                                                                                                                                                                                                                                                                                                                                 |
| GRMZM2G701058 | -0.632566384       | 2.150453077              | 0.043514435 | 1   | Not Annotated                                                                                                                         | Not Annotated                                                                                                                                                                                                                                                                                                                                                                                                                               |
| GRMZM2G011078 | -0.445939508       | 3.605900247              | 0.043542688 | 1   | SCAMP                                                                                                                                 | cellular_component cell plasma membrane transport biological_process protein transport membrane integral component of membrane                                                                                                                                                                                                                                                                                                              |
| GRMZM2G111679 | -0.660655908       | 2.079191723              | 0.043564472 | 1   | LEA-14                                                                                                                                | Not Annotated                                                                                                                                                                                                                                                                                                                                                                                                                               |
| GRMZM2G011631 | -0.54749725        | 4.527083995              | 0.043611183 | 1   | DNA-<br>dir_DNA_pol_B_exonu<br>c DNA-<br>dir_DNA_pol_B_multi-<br>dom DNA-<br>dir_DNA_pol_B RNase<br>H-<br>like_dom DNA_pol_e<br>suA_C | nucleotide binding molecular_function nucleic acid binding DNA binding DNA-directed DNA polymerase activity cellular_component intracellular cell nucleus nucleobase-containing compound metabolic process DNA metabolic process DNA replication biological_process zinc ion binding epsilon DNA polymerase complex biosynthetic process nucleotidyltransferase activity cellular nitrogen compound metabolic process ion binding organelle |
| GRMZM2G168228 | -0.541675593       | 4.204176245              | 0.043729395 | 1   | ATPase_AAA_CS ATPa<br>se_AAA_core                                                                                                     | molecular_function ATP binding                                                                                                                                                                                                                                                                                                                                                                                                              |

| Gene          | log2 (fold change) | log2 (count per million) | P-value     | FDR | Interpro                                                                                                 | GO                                                                                                                                                                                                                                                                                                                                                                                                                                                                                                                                                                                                                                       |
|---------------|--------------------|--------------------------|-------------|-----|----------------------------------------------------------------------------------------------------------|------------------------------------------------------------------------------------------------------------------------------------------------------------------------------------------------------------------------------------------------------------------------------------------------------------------------------------------------------------------------------------------------------------------------------------------------------------------------------------------------------------------------------------------------------------------------------------------------------------------------------------------|
| GRMZM2G063851 | -0.343920198       | 6.740767795              | 0.043743909 | 1   | Citrate_synthase-like Citrate_synthase_euk Citrate_synthase-like_core Citrate_synthase_AS                | molecular_function citrate (S)-synthase activity ATP binding cellular_component cell wall intracellular cell cytoplasm mitochondrion carbohydrate metabolic process generation of precursor metabolites and energy tricarboxylic acid cycle biological_process zinc ion binding catabolic process chloroplast plastid transferase activity transferase activity, transferring acyl groups external encapsulating structure ion binding organelle cellular carbohydrate metabolic process response to cadmium ion transferase activity, transferring acyl groups, acyl groups converted into alkyl on transfer cofactor metabolic process |
| GRMZM2G476902 | 5.682387865        | -2.342306726             | 0.043789497 | 1   | Armadillo ARM-rpt_dom ARM-type_fold                                                                      | molecular_function binding protein binding                                                                                                                                                                                                                                                                                                                                                                                                                                                                                                                                                                                               |
| GRMZM2G091973 | -2.509591532       | -1.503578777             | 0.043926062 | 1   | Reticulon                                                                                                | cellular_component intracellular cell cytoplasm endoplasmic reticulum organelle                                                                                                                                                                                                                                                                                                                                                                                                                                                                                                                                                          |
| GRMZM2G089767 | -0.505946146       | 2.90326228               | 0.043929868 | 1   | Carboh/pur_kinase_Pf kB_CS Adenokinase Pf kB_dom                                                         | molecular_function phosphotransferase activity, alcohol group as acceptor                                                                                                                                                                                                                                                                                                                                                                                                                                                                                                                                                                |
| GRMZM2G496477 | -2.215776886       | -1.518722823             | 0.044162916 | 1   | Not Annotated                                                                                            | Not Annotated                                                                                                                                                                                                                                                                                                                                                                                                                                                                                                                                                                                                                            |
| GRMZM2G055905 | -0.354898605       | 5.698587791              | 0.044219097 | 1   | PEstase_dom Ser/Thrsp_prot-phosphatase                                                                   | molecular_function phosphoprotein phosphatase activity cellular_component intracellular cell nucleus cytoplasm biological_process negative regulation of flower development hydrolase activity phosphatase activity organelle                                                                                                                                                                                                                                                                                                                                                                                                            |
| GRMZM5G864412 | -2.844820352       | -2.155573489             | 0.044299288 | 1   | PCRF Pep_chain_release_fac_I Cyclin-like                                                                 | molecular_function RNA binding translation release factor activity cellular_component intracellular cell cytoplasm translation translational termination translation factor activity, nucleic acid binding biological_process biosynthetic process translation release factor activity, codon specific                                                                                                                                                                                                                                                                                                                                   |
| GRMZM2G462760 | -1.968797709       | -1.112498219             | 0.044338937 | 1   | Auxin_inducible_ARG7                                                                                     | molecular_function calmodulin binding cellular_component intracellular cell cytoplasm mitochondrion signal transduction biological_process auxin-activated signaling pathway organelle response to stimulus                                                                                                                                                                                                                                                                                                                                                                                                                              |
| GRMZM2G150952 | -0.323893029       | 3.325034558              | 0.044357983 | 1   | Prot_kinase_dom PAP/fibrillin_dom Kinase-like_dom                                                        | molecular_function protein kinase activity structural molecule activity ATP binding cellular_component intracellular cell cytoplasm cellular protein modification process protein phosphorylation biological_process chloroplast plastid kinase activity phosphorylation transferase activity, transferring phosphorus-containing groups organelle                                                                                                                                                                                                                                                                                       |
| GRMZM2G007038 | -0.498896148       | 4.38508151               | 0.044569008 | 1   | Small_GTP-bd_dom Transl_elong_EFTu/EF1A_2 EF_GTP-bd_dom TF_IF2_bacterial-like Transl_barrel TIF_IF2_dom3 | nucleotide binding molecular_function RNA binding translation initiation factor activity GTPase activity GTP binding cellular_component intracellular cell GTP catabolic process translation translational initiation translation factor activity, nucleic acid binding biological_process catabolic process biosynthetic process cellular nitrogen compound metabolic process nucleobase-containing compound catabolic process small molecule metabolic process chloroplast stroma chloroplast envelope                                                                                                                                 |
| GRMZM2G171229 | -1.145434831       | -0.512947915             | 0.044575824 | 1   | Cyt_trans-like                                                                                           | molecular_function catalytic activity biological_process biosynthetic process transferase activity nucleotidyltransferase activity                                                                                                                                                                                                                                                                                                                                                                                                                                                                                                       |
| GRMZM2G138997 | -0.494483456       | 2.175580266              | 0.044673374 | 1   | Znf_RING                                                                                                 | molecular_function protein binding zinc ion binding ion binding metal ion binding                                                                                                                                                                                                                                                                                                                                                                                                                                                                                                                                                        |

| Gene             | log2 (fold change) | log2 (count per million) | P-value     | FDR | Interpro                                                                                      | GO                                                                                                                                                                                                                                                                                                                                                                                                                                             |
|------------------|--------------------|--------------------------|-------------|-----|-----------------------------------------------------------------------------------------------|------------------------------------------------------------------------------------------------------------------------------------------------------------------------------------------------------------------------------------------------------------------------------------------------------------------------------------------------------------------------------------------------------------------------------------------------|
| GRMZM2G092813    | -2.967347766       | -2.102487771             | 0.044894994 | 1   | AMP-dep_Synth/Lig AMP-binding_CS AMP-bd_C                                                     | molecular_function catalytic activity sulfur compound metabolic process biological_process metabolic process biosynthetic process ligase activity benzoate-CoA ligase activity secondary metabolic process glucosinolate biosynthetic process                                                                                                                                                                                                  |
| GRMZM2G088896    | -1.243750343       | 4.298287707              | 0.04493238  | 1   | Not Annotated                                                                                 | Not Annotated                                                                                                                                                                                                                                                                                                                                                                                                                                  |
| GRMZM5G837841    | -1.185521095       | 2.349387819              | 0.044983155 | 1   | EXOV                                                                                          | Not Annotated                                                                                                                                                                                                                                                                                                                                                                                                                                  |
| GRMZM2G328356    | 5.547690956        | -2.374940888             | 0.045008725 | 1   | Not Annotated                                                                                 | Not Annotated                                                                                                                                                                                                                                                                                                                                                                                                                                  |
| GRMZM2G047705    | -0.351197026       | 4.42044131               | 0.045012706 | 1   | Not Annotated                                                                                 | Not Annotated                                                                                                                                                                                                                                                                                                                                                                                                                                  |
| GRMZM2G318033    | -6.650356453       | -1.631813185             | 0.045082706 | 1   | Uncharacterised_Cys-rich DUF2985                                                              | cellular_component cell plasma membrane                                                                                                                                                                                                                                                                                                                                                                                                        |
| GRMZM2G114503    | -5.190552506       | -1.853191931             | 0.045128457 | 1   | SANT/Myb Homeodomain-like                                                                     | molecular_function DNA binding chromatin binding                                                                                                                                                                                                                                                                                                                                                                                               |
| GRMZM2G335287    | -0.280378548       | 5.165644155              | 0.045133455 | 1   | Sec7_dom DUF1981_Sec7_assoc ARM-type_fold                                                     | molecular_function ARF guanyl-nucleotide exchange factor activity binding biological_process enzyme regulator activity regulation of ARF protein signal transduction                                                                                                                                                                                                                                                                           |
| GRMZM2G399284    | -0.586519108       | 5.898120446              | 0.045158227 | 1   | GroES-like Chaperonin_21_chloroplast Chapronin_Cpn10_CS Chaperonin_Cpn10                      | molecular_function copper ion binding ATP binding cellular_component extracellular region intracellular cell cytoplasm mitochondrion protein folding response to stress biological_process response to cold chloroplast chloroplast thylakoid membrane plastid chloroplast stroma thylakoid chloroplast envelope ion binding organelle response to cadmium ion apoplast positive regulation of superoxide dismutase activity                   |
| GRMZM2G020508    | -0.985454012       | 2.588694343              | 0.045204484 | 1   | Not Annotated                                                                                 | Not Annotated                                                                                                                                                                                                                                                                                                                                                                                                                                  |
| GRMZM2G087482    | -0.36789281        | 4.573285761              | 0.045228775 | 1   | Znf_PHD Znf_FYVE_PHD Zinc_finger_PHD-type_CS Znf_PHD-finger GNAT_dom Acyl-CoA_acyltransferase | molecular_function protein binding zinc ion binding ion binding N-acetyltransferase activity transferase activity, transferring acyl groups                                                                                                                                                                                                                                                                                                    |
| GRMZM2G093766    | -0.410870772       | 3.791262059              | 0.045231419 | 1   | Not Annotated                                                                                 | Not Annotated                                                                                                                                                                                                                                                                                                                                                                                                                                  |
| AC194272.3_FG003 | 1.068004259        | -1.814322818             | 0.045304229 | 1   | Not Annotated                                                                                 | Not Annotated                                                                                                                                                                                                                                                                                                                                                                                                                                  |
| GRMZM2G035405    | -0.560218293       | 4.875579027              | 0.045316785 | 1   | B3_DNA-bd AUX_IAA Auxin_receptor AuxIAA_ARF_dimer DNA-bd_pseudobarrel                         | reproduction molecular_function DNA binding cellular_component intracellular cell nucleus transcription, DNA-templated regulation of transcription, DNA-templated signal transduction biological_process biosynthetic process response to hormone response to auxin auxin-activated signaling pathway flower development cellular nitrogen compound metabolic process organelle protein dimerization activity anatomical structure development |
| GRMZM2G071448    | -0.259401091       | 3.744970936              | 0.04536761  | 1   | WD40_repeat WD40_repeat_dom WD40_repeat_CS G-protein_beta_WD40_rep                            | molecular_function protein binding                                                                                                                                                                                                                                                                                                                                                                                                             |
| GRMZM2G081907    | -1.266374302       | 0.249270749              | 0.045386211 | 1   | ARM-type_fold CLASP_N_domain                                                                  | molecular_function binding                                                                                                                                                                                                                                                                                                                                                                                                                     |
| GRMZM2G078297    | -0.875394386       | 1.778230529              | 0.045449902 | 1   | Not Annotated                                                                                 | Not Annotated                                                                                                                                                                                                                                                                                                                                                                                                                                  |
| GRMZM2G096008    | -1.467034179       | -0.519070432             | 0.045534968 | 1   | HeavyMe-assoc_HMA                                                                             | molecular_function transport biological_process metal ion transport ion binding metal ion binding                                                                                                                                                                                                                                                                                                                                              |
| GRMZM2G465728    | -0.509064072       | 1.727536564              | 0.045578847 | 1   | Not Annotated                                                                                 | Not Annotated                                                                                                                                                                                                                                                                                                                                                                                                                                  |
| GRMZM2G167766    | -0.85741877        | 1.926258017              | 0.045587004 | 1   | Uncharacterised_Ycf19                                                                         | cellular_component chloroplast chloroplast thylakoid membrane cytochrome b6f complex assembly membrane                                                                                                                                                                                                                                                                                                                                         |



| Gene          | log2 (fold change) | log2 (count per million) | P-value     | FDR | Interpro                                                                         | GO                                                                                                                                                                                                                                                                                                                                                                                                                                                                                                                       |
|---------------|--------------------|--------------------------|-------------|-----|----------------------------------------------------------------------------------|--------------------------------------------------------------------------------------------------------------------------------------------------------------------------------------------------------------------------------------------------------------------------------------------------------------------------------------------------------------------------------------------------------------------------------------------------------------------------------------------------------------------------|
| GRMZM2G093598 | -0.27653008        | 4.042793049              | 0.045646322 | 1   | UDPgal_transpt Nuc_sug_transpt UDP/CMP-sugar_transptr                            | Golgi membrane molecular_function nucleotide-sugar transmembrane transporter activity sugar:hydrogen symporter activity cellular_component intracellular cell cytoplasm Golgi apparatus transport biological_process carbohydrate transport nucleotide sugar transport membrane integral component of membrane transmembrane transporter activity organelle sialic acid transmembrane transporter activity sialic acid transport                                                                                         |
| GRMZM2G035848 | -0.558296638       | 1.750407534              | 0.045656638 | 1   | Not Annotated                                                                    | Not Annotated                                                                                                                                                                                                                                                                                                                                                                                                                                                                                                            |
| GRMZM2G177215 | 1.583851225        | -0.194491679             | 0.045737036 | 1   | Not Annotated                                                                    | Not Annotated                                                                                                                                                                                                                                                                                                                                                                                                                                                                                                            |
| GRMZM2G088539 | -0.507011956       | 4.967568935              | 0.045786218 | 1   | Znf_RanBP2                                                                       | molecular_function cellular_component intracellular cell zinc ion binding ion binding                                                                                                                                                                                                                                                                                                                                                                                                                                    |
| GRMZM2G074208 | -1.091972963       | 0.775795154              | 0.04581431  | 1   | DNA_methylase_N6_a denine_CS N6_adenine_Mtase-rel_euk ATPase_P-typ_cyto_domN     | molecular_function nucleic acid binding biological_process methyltransferase activity methylation                                                                                                                                                                                                                                                                                                                                                                                                                        |
| GRMZM2G363554 | 6.122335732        | -2.099706959             | 0.045874985 | 1   | UDP_glucos_trans                                                                 | molecular_function biological_process metabolic process transferase activity, transferring glycosyl groups transferase activity, transferring hexosyl groups                                                                                                                                                                                                                                                                                                                                                             |
| GRMZM2G124061 | -1.345180128       | 0.011082506              | 0.045895038 | 1   | VWF_A                                                                            | molecular_function protein binding                                                                                                                                                                                                                                                                                                                                                                                                                                                                                       |
| GRMZM2G428201 | -0.780917992       | 2.307999913              | 0.045903319 | 1   | Ser-Thr/Tyr_kinase_cat_dom Prot_kinase_dom Kinase-like_dom Protein_kinase_ATP_BS | molecular_function protein kinase activity ATP binding cellular protein modification process protein phosphorylation biological_process kinase activity transferase activity, transferring phosphorus-containing groups                                                                                                                                                                                                                                                                                                  |
| GRMZM2G106028 | -0.416591446       | 4.921843667              | 0.046014313 | 1   | MAP65_Ase1_PRC1                                                                  | microtubule cytoskeleton organization cytokinesis molecular_function cytoskeleton organization microtubule binding cytoskeletal protein binding biological_process cell division                                                                                                                                                                                                                                                                                                                                         |
| GRMZM2G146280 | -0.345495604       | 5.776497621              | 0.046045128 | 1   | WD40_repeat WD40_repeat_dom                                                      | molecular_function protein binding autophagy response to stress aging biological_process catabolic process leaf senescence response to starvation anatomical structure development                                                                                                                                                                                                                                                                                                                                       |
| GRMZM2G351454 | -0.799127579       | 0.996286295              | 0.04609683  | 1   | APO_dom                                                                          | molecular_function RNA binding                                                                                                                                                                                                                                                                                                                                                                                                                                                                                           |
| GRMZM2G326643 | -0.402729204       | 7.332244022              | 0.046102842 | 1   | Glyco_trans_48 FKS1-like_dom1                                                    | reproduction 1,3-beta-D-glucan synthase complex molecular_function 1,3-beta-D-glucan synthase activity cellular_component cell plasma membrane carbohydrate metabolic process (1->3)-beta-D-glucan biosynthetic process cell cycle biological_process biosynthetic process pollen development microsporogenesis membrane transferase activity, transferring glycosyl groups growth protein complex developmental growth                                                                                                  |
| GRMZM2G011355 | -0.740792087       | 6.513230409              | 0.046189629 | 1   | Small_GTPase_ARF/SA R Small_GTPase_ARF                                           | nucleotide binding molecular_function GTP binding cellular_component intracellular cell signal transduction small GTPase mediated signal transduction biological_process                                                                                                                                                                                                                                                                                                                                                 |
| GRMZM2G029055 | -0.292754995       | 4.66345302               | 0.046216179 | 1   | tRNAsynth_1a_anticon-bd Met-tRNA_synth Methionyl/Leucyl_tRNA_Synth               | nucleotide binding molecular_function aminoacyl-tRNA ligase activity methionine-tRNA ligase activity ATP binding cellular_component intracellular cell cytoplasm mitochondrion tRNA metabolic process translation tRNA aminoacylation for protein translation methionyl-tRNA aminoacylation cellular amino acid metabolic process biological_process biosynthetic process chloroplast chloroplast stroma ligase activity cellular nitrogen compound metabolic process small molecule metabolic process ovule development |

| Gene          | log2 (fold change) | log2 (count per million) | P-value     | FDR | Interpro                                                                                                        | GO                                                                                                                                                                                                                                                                                                                                                                                                                                                                     |
|---------------|--------------------|--------------------------|-------------|-----|-----------------------------------------------------------------------------------------------------------------|------------------------------------------------------------------------------------------------------------------------------------------------------------------------------------------------------------------------------------------------------------------------------------------------------------------------------------------------------------------------------------------------------------------------------------------------------------------------|
| GRMZM2G003225 | -1.299631648       | 0.268388718              | 0.046346373 | 1   | Nse4_C                                                                                                          | cellular_component intracellular cell nucleus chromosome DNA metabolic process DNA repair response to stress biological_process Smc5-Smc6 complex cellular nitrogen compound metabolic process organelle protein complex                                                                                                                                                                                                                                               |
| GRMZM2G009849 | -0.37475848        | 5.561982478              | 0.046406061 | 1   | ARM-type_fold                                                                                                   | molecular_function binding microtubule binding plasmodesma preprophase band cell plate formation involved in plant-type cell wall biogenesis cortical microtubule cytoskeleton                                                                                                                                                                                                                                                                                         |
| GRMZM2G471670 | 1.108353859        | -0.48242015              | 0.046415997 | 1   | Clp_N                                                                                                           | biological_process protein metabolic process                                                                                                                                                                                                                                                                                                                                                                                                                           |
| GRMZM2G006452 | -0.384170121       | 4.645974905              | 0.046567052 | 1   | RecF/RecN/SMC_N S MC_hinge                                                                                      | molecular_function protein binding ATP binding cellular_component intracellular cell chromosome biological_process organelle chromosome organization                                                                                                                                                                                                                                                                                                                   |
| GRMZM2G057416 | 0.927848439        | 2.670548226              | 0.046578147 | 1   | Prot_kinase_dom Ser/Thr_kinase_AS Kinase-like_dom Protein_kinase_ATP_BS                                         | nucleotide binding molecular_function protein kinase activity protein serine/threonine kinase activity ATP binding cellular protein modification process protein phosphorylation biological_process kinase activity phosphorylation transferase activity, transferring phosphorus-containing groups cytoplasm                                                                                                                                                          |
| GRMZM2G163159 | -0.377378214       | 2.633482394              | 0.04660464  | 1   | Not Annotated                                                                                                   | Not Annotated                                                                                                                                                                                                                                                                                                                                                                                                                                                          |
| GRMZM2G161641 | -1.112647767       | 0.79752435               | 0.046687856 | 1   | AA_transpt_TM                                                                                                   | Not Annotated                                                                                                                                                                                                                                                                                                                                                                                                                                                          |
| GRMZM2G021885 | 0.599473732        | 4.697740903              | 0.046808093 | 1   | Not Annotated                                                                                                   | Not Annotated                                                                                                                                                                                                                                                                                                                                                                                                                                                          |
| GRMZM2G085939 | -0.730912506       | 2.273321879              | 0.047052368 | 1   | Lipase_3 Mono/diacylglycerol_lipase_N                                                                           | molecular_function triglyceride lipase activity lipid metabolic process biological_process catabolic process lipid catabolic process hydrolase activity                                                                                                                                                                                                                                                                                                                |
| GRMZM2G089676 | -0.309896977       | 5.334626137              | 0.047130436 | 1   | NTF2 RRM_dom Nuclear_transport_factor_2_euk                                                                     | nucleotide binding molecular_function nucleic acid binding cellular_component intracellular cell transport biological_process                                                                                                                                                                                                                                                                                                                                          |
| GRMZM2G070394 | -1.3802367         | -0.239700256             | 0.047171437 | 1   | Not Annotated                                                                                                   | Not Annotated                                                                                                                                                                                                                                                                                                                                                                                                                                                          |
| GRMZM2G465764 | -0.512711668       | 3.353586362              | 0.047200405 | 1   | Glyco_trans_48                                                                                                  | 1,3-beta-D-glucan synthase complex molecular_function 1,3-beta-D-glucan synthase activity cellular_component cell plasma membrane carbohydrate metabolic process (1-&gt;3)-beta-D-glucan biosynthetic process biological_process biosynthetic process membrane transferase activity, transferring glycosyl groups protein complex                                                                                                                                      |
| GRMZM2G497523 | -5.66464753        | -2.068141419             | 0.047212499 | 1   | Not Annotated                                                                                                   | Not Annotated                                                                                                                                                                                                                                                                                                                                                                                                                                                          |
| GRMZM2G386714 | -0.252961929       | 5.062437523              | 0.047213481 | 1   | NA-bd_OB_tRNA aa-tRNA-synt_II Lys-tRNA-ligase_II aa-tRNA-synth_II NA-bd_OB-fold Lys-tRNA-synth_II_C             | nucleotide binding molecular_function nucleic acid binding aminoacyl-tRNA ligase activity lysine-tRNA ligase activity ATP binding cellular_component intracellular cell cytoplasm tRNA metabolic process translation tRNA aminoacylation for protein translation lysyl-tRNA aminoacylation cellular amino acid metabolic process biological_process biosynthetic process ligase activity cellular nitrogen compound metabolic process small molecule metabolic process |
| GRMZM2G003289 | -0.828745997       | 0.347877178              | 0.047228572 | 1   | Trp_syn_b_sub_like_PLP_eny_SF                                                                                   | Not Annotated                                                                                                                                                                                                                                                                                                                                                                                                                                                          |
| GRMZM2G306771 | -0.771506469       | 0.950964139              | 0.047307153 | 1   | Leu-rich_rpt Ser/Thr/Tyr_kinase_cat_dom Prot_kinase_dom Ser/Thr_kinase_AS Kinase-like_dom Protein_kinase_ATP_BS | molecular_function protein kinase activity protein serine/threonine kinase activity protein binding ATP binding cellular protein modification process protein phosphorylation biological_process kinase activity transferase activity, transferring phosphorus-containing groups                                                                                                                                                                                       |
| GRMZM2G112895 | -0.387457417       | 3.347037116              | 0.047340862 | 1   | Not Annotated                                                                                                   | Not Annotated                                                                                                                                                                                                                                                                                                                                                                                                                                                          |
| GRMZM2G086841 | -1.3802367         | -0.22140044              | 0.047403271 | 1   | DnaJ_domain                                                                                                     | nucleus response to light stimulus chloroplast stroma                                                                                                                                                                                                                                                                                                                                                                                                                  |

| Gene             | log2 (fold change) | log2 (count per million) | P-value     | FDR | Interpro                                                         | GO                                                                                                                                                                                                                                                                                                                                                                                                                                                                                                                                                                                                                                                                    |
|------------------|--------------------|--------------------------|-------------|-----|------------------------------------------------------------------|-----------------------------------------------------------------------------------------------------------------------------------------------------------------------------------------------------------------------------------------------------------------------------------------------------------------------------------------------------------------------------------------------------------------------------------------------------------------------------------------------------------------------------------------------------------------------------------------------------------------------------------------------------------------------|
| GRMZM2G179215    | -0.645932338       | 4.008732995              | 0.047522562 | 1   | Small_GTPase_Rab_type Small_GTPase Small_GTP-bd_dom              | nucleotide binding molecular_function GTP binding transport signal transduction small GTPase mediated signal transduction biological_process protein transport                                                                                                                                                                                                                                                                                                                                                                                                                                                                                                        |
| GRMZM2G037413    | 6.024278545        | -2.082511678             | 0.047533833 | 1   | Cellulose_synth Znf_R1NG                                         | molecular_function protein binding cellular_component carbohydrate metabolic process biological_process zinc ion binding biosynthetic process membrane transferase activity, transferring glycosyl groups cellulose synthase (UDP-forming) activity cellulose biosynthetic process ion binding cell wall cell response to stress response to osmotic stress response to water deprivation secondary cell wall biogenesis positive regulation of abscisic acid biosynthetic process integral component of membrane transferase activity external encapsulating structure defense response to bacterium defense response to fungus cell wall organization or biogenesis |
| GRMZM2G165272    | -0.953812672       | 4.442567619              | 0.047651617 | 1   | HSF_DNA-bd                                                       | nucleic acid binding transcription factor activity molecular_function DNA binding sequence-specific DNA binding transcription factor activity cellular_component intracellular cell nucleus regulation of transcription, DNA-templated biological_process organelle sequence-specific DNA binding                                                                                                                                                                                                                                                                                                                                                                     |
| GRMZM2G092968    | -0.968259159       | 1.227760896              | 0.047672335 | 1   | Not Annotated                                                    | Not Annotated                                                                                                                                                                                                                                                                                                                                                                                                                                                                                                                                                                                                                                                         |
| GRMZM2G446625    | -0.575758035       | 3.51123781               | 0.047721194 | 1   | DUF1350                                                          | Not Annotated                                                                                                                                                                                                                                                                                                                                                                                                                                                                                                                                                                                                                                                         |
| GRMZM2G053117    | -1.437149867       | 3.476650092              | 0.047804801 | 1   | Kinase-like_dom Methionyl/Lucyl_tRNA_Synth LA CT/PDAT_acylTrfase | nucleotide binding molecular_function aminoacyl-tRNA ligase activity ATP binding cellular_component intracellular cell cytoplasm tRNA metabolic process translation tRNA aminoacylation for protein translation cellular amino acid metabolic process biological_process biosynthetic process transferase activity, transferring phosphorus-containing groups ligase activity cellular nitrogen compound metabolic process small molecule metabolic process lipid metabolic process O-acyltransferase activity transferase activity, transferring acyl groups                                                                                                         |
| GRMZM2G006759    | -1.393065149       | 0.70262899               | 0.047814611 | 1   | Not Annotated                                                    | Not Annotated                                                                                                                                                                                                                                                                                                                                                                                                                                                                                                                                                                                                                                                         |
| GRMZM2G416322    | -1.408956345       | -0.97984116              | 0.047846466 | 1   | Ser-Thr/Tyr_kinase_cat_dom Prot_kinase_dom Kinase-like_dom       | molecular_function protein kinase activity ATP binding cellular protein modification process protein phosphorylation biological_process kinase activity transferase activity, transferring phosphorus-containing groups                                                                                                                                                                                                                                                                                                                                                                                                                                               |
| GRMZM2G059212    | -0.34486811        | 6.892070917              | 0.047864949 | 1   | Glyco_trans_48                                                   | 1,3-beta-D-glucan synthase complex molecular_function 1,3-beta-D-glucan synthase activity cellular_component cell plasma membrane carbohydrate metabolic process (1->3)-beta-D-glucan biosynthetic process biological_process biosynthetic process cell plate plasmodesma membrane transferase activity, transferring glycosyl groups protein complex                                                                                                                                                                                                                                                                                                                 |
| GRMZM5G833066    | -1.255758727       | 4.054225152              | 0.047894042 | 1   | Not Annotated                                                    | Not Annotated                                                                                                                                                                                                                                                                                                                                                                                                                                                                                                                                                                                                                                                         |
| GRMZM2G342254    | -2.122278548       | -0.693109287             | 0.047927047 | 1   | Not Annotated                                                    | Not Annotated                                                                                                                                                                                                                                                                                                                                                                                                                                                                                                                                                                                                                                                         |
| GRMZM5G891295    | -0.527145896       | 3.222353383              | 0.047929014 | 1   | PIG-U                                                            | cellular_component intracellular cell cytoplasm endoplasmic reticulum endoplasmic reticulum membrane plasma membrane cellular protein modification process GPI anchor biosynthetic process lipid metabolic process biological_process biosynthetic process integral component of membrane organelle                                                                                                                                                                                                                                                                                                                                                                   |
| AC233864.1_FG014 | -1.416903436       | -0.357843906             | 0.047945188 | 1   | DUF616                                                           | Not Annotated                                                                                                                                                                                                                                                                                                                                                                                                                                                                                                                                                                                                                                                         |
| GRMZM2G158333    | 1.237318858        | 6.257243892              | 0.048317442 | 1   | Ribosomal_S7_CS Ribosomal_S7_dom                                 | molecular_function RNA binding structural constituent of ribosome structural molecule activity translation biological_process biosynthetic process                                                                                                                                                                                                                                                                                                                                                                                                                                                                                                                    |

| Gene             | log2 (fold change) | log2 (count per million) | P-value     | FDR | Interpro                                                                     | GO                                                                                                                                                                                                                                                                                                                                                                                                                                                                                                                                             |
|------------------|--------------------|--------------------------|-------------|-----|------------------------------------------------------------------------------|------------------------------------------------------------------------------------------------------------------------------------------------------------------------------------------------------------------------------------------------------------------------------------------------------------------------------------------------------------------------------------------------------------------------------------------------------------------------------------------------------------------------------------------------|
| GRMZM2G364901    | -0.376207389       | 3.672529926              | 0.048339102 |     | Protoporphyrinogen_oxidase Amino_oxidase                                     | reproduction nucleotide binding molecular_function oxygen-dependent protoporphyrinogen oxidase activity cellular_component intracellular cell cytoplasm mitochondrion porphyrin-containing compound biosynthetic process biological_process biosynthetic process chloroplast plastid embryo development embryo development ending in seed dormancy chloroplast envelope oxidoreductase activity cellular nitrogen compound metabolic process organelle anatomical structure development cofactor metabolic process oxidation-reduction process |
| GRMZM2G032337    | -0.548737502       | 3.56078436               | 0.048393636 |     | Prot_kinase_dom UspA Ser/Thr_kinase_AS Kinase-like_dom Protein_kinase_ATP_BS | nucleotide binding molecular_function protein kinase activity protein serine/threonine kinase activity ATP binding cellular protein modification process protein phosphorylation response to stress biological_process kinase activity transferase activity, transferring phosphorus-containing groups                                                                                                                                                                                                                                         |
| GRMZM2G037585    | -0.287929269       | 4.650093051              | 0.048627275 |     | Prot_kinase_dom Ser/Thr_kinase_AS Kinase-like_dom Protein_kinase_ATP_BS      | nucleotide binding molecular_function protein kinase activity protein serine/threonine kinase activity ATP binding cellular_component cell plasma membrane cellular protein modification process protein phosphorylation biological_process kinase activity transferase activity, transferring phosphorus-containing groups                                                                                                                                                                                                                    |
| GRMZM2G472382    | -0.800184591       | 1.152046081              | 0.048643461 |     | PCRf PrfB Pep_chain_release_fac_I_II                                         | molecular_function RNA binding translation release factor activity cellular_component intracellular cell cytoplasm RNA processing translation translational termination translation factor activity, nucleic acid binding biological_process biosynthetic process chloroplast plastid plastid organization translation release factor activity, codon specific cellular nitrogen compound metabolic process organelle                                                                                                                          |
| GRMZM5G846198    | -0.476117623       | 5.024919139              | 0.048648169 |     | Glyco_trans_8                                                                | molecular_function transferase activity, transferring glycosyl groups                                                                                                                                                                                                                                                                                                                                                                                                                                                                          |
| GRMZM2G082330    | -0.321068968       | 5.964458426              | 0.048724067 |     | Protease-assoc_domain Preselin/SPP Peptidase_A22B_1_SPP                      | molecular_function aspartic-type endopeptidase activity cellular_component cell vacuolar membrane plasma membrane peptidase activity integral component of membrane                                                                                                                                                                                                                                                                                                                                                                            |
| GRMZM2G093623    | -0.536414453       | 3.601141585              | 0.048727538 |     | DNA_mismatch_repair_1_MutS_C                                                 | molecular_function DNA binding damaged DNA binding ATP binding DNA metabolic process mismatch repair response to stress biological_process mismatched DNA binding cellular nitrogen compound metabolic process                                                                                                                                                                                                                                                                                                                                 |
| GRMZM2G075463    | -2.159055047       | -1.011168898             | 0.048779948 |     | Not Annotated                                                                | Not Annotated                                                                                                                                                                                                                                                                                                                                                                                                                                                                                                                                  |
| AC211175.3_FG005 | -0.451984752       | 2.785958505              | 0.048856241 |     | Prot_kinase_dom Ser/Thr_kinase_AS Kinase-like_dom Protein_kinase_ATP_BS      | molecular_function protein kinase activity protein serine/threonine kinase activity ATP binding cellular protein modification process protein phosphorylation biological_process kinase activity transferase activity, transferring phosphorus-containing groups                                                                                                                                                                                                                                                                               |
| GRMZM2G058862    | -0.679656373       | 1.330529459              | 0.048858707 |     | TatD_family DNase_TatD-rel_CS                                                | molecular_function nuclease activity endodeoxyribonuclease activity, producing 5'-phosphomonoesters                                                                                                                                                                                                                                                                                                                                                                                                                                            |
| GRMZM2G059669    | -0.39842888        | 3.485502678              | 0.048888787 |     | Aminotrans_IV                                                                | molecular_function catalytic activity biological_process metabolic process                                                                                                                                                                                                                                                                                                                                                                                                                                                                     |
| GRMZM2G147112    | -5.559918443       | -2.117798471             | 0.048966566 |     | Prot_kinase_dom Kinase-like_dom                                              | molecular_function protein kinase activity ATP binding nucleus nucleolus cytoplasm cellular protein modification process protein phosphorylation biological_process kinase activity transferase activity, transferring phosphorus-containing groups                                                                                                                                                                                                                                                                                            |
| GRMZM2G116785    | -0.27370797        | 4.043809229              | 0.048989197 |     | bHLH_dom                                                                     | molecular_function DNA binding regulation of transcription, DNA-templated biological_process protein dimerization activity                                                                                                                                                                                                                                                                                                                                                                                                                     |

| Gene             | log2 (fold change) | log2 (count per million) | P-value     | FDR | Interpro                                                                                  | GO                                                                                                                                                                                                                                                                                    |
|------------------|--------------------|--------------------------|-------------|-----|-------------------------------------------------------------------------------------------|---------------------------------------------------------------------------------------------------------------------------------------------------------------------------------------------------------------------------------------------------------------------------------------|
| GRMZM2G128477    | -0.239680947       | 3.949183401              | 0.049024132 | 1   | WD40_repeat WD40_repeat_dom WD40_repeat_CS G-protein_beta_WD-140_rep                      | molecular_function protein binding negative regulation of shoot apical meristem development                                                                                                                                                                                           |
| GRMZM2G120151    | 2.372306186        | -0.982577197             | 0.049117446 | 1   | Transcription_factor_TCP TF_TCP_subgr                                                     | Not Annotated                                                                                                                                                                                                                                                                         |
| GRMZM2G524711    | -0.453033782       | 2.37559633               | 0.049120128 | 1   | Not Annotated                                                                             | molecular_function protein binding                                                                                                                                                                                                                                                    |
| GRMZM2G313553    | -0.468922505       | 3.80828704               | 0.049126565 | 1   | HNH_nuc HNH Helicase_C                                                                    | molecular_function nucleic acid binding helicase activity nuclease activity endonuclease activity ATP binding                                                                                                                                                                         |
| GRMZM2G146446    | -0.830924395       | 4.417841541              | 0.049182243 | 1   | EGF-like_CS DUF3522                                                                       | Not Annotated                                                                                                                                                                                                                                                                         |
| GRMZM2G147724    | -0.47405868        | 1.946560911              | 0.049227749 | 1   | Sphingomyelin_synth-like_dom                                                              | molecular_function lipid metabolic process biological_process biosynthetic process transferase activity, transferring glycosyl groups sphingolipid biosynthetic process inositol phosphoceramide synthase activity                                                                    |
| AC209987.4_FG010 | -0.350867263       | 3.137847684              | 0.049232919 | 1   | Plcyanin-like Cupredoxin                                                                  | molecular_function copper ion binding electron carrier activity ion binding                                                                                                                                                                                                           |
| GRMZM2G446213    | 0.753628378        | 2.688704418              | 0.04927013  | 1   | DUF1005                                                                                   | cellular_component cell plasma membrane plastid                                                                                                                                                                                                                                       |
| GRMZM2G136926    | -1.110029694       | 1.081243232              | 0.049445521 | 1   | Not Annotated                                                                             | Not Annotated                                                                                                                                                                                                                                                                         |
| GRMZM2G143182    | -5.324460101       | -2.17758658              | 0.049519285 | 1   | DUF223 NA-bd_OB-fold Rep_factor-A_C                                                       | Not Annotated                                                                                                                                                                                                                                                                         |
| GRMZM5G865999    | -0.342588811       | 4.781687994              | 0.049520823 | 1   | Ser/Thr_dual-sp_kinase_dom AGC-kinase_C Prot_kinase_dom Ser/Thr_kinase_AS Kinase-like_dom | molecular_function protein kinase activity protein serine/threonine kinase activity ATP binding cellular protein modification process protein phosphorylation biological_process kinase activity transferase activity, transferring phosphorus-containing groups                      |
| GRMZM2G140728    | -1.215049476       | 1.839073437              | 0.049554636 | 1   | Glyoxalase-like_dom                                                                       | Not Annotated                                                                                                                                                                                                                                                                         |
| GRMZM2G127478    | -1.164114798       | 0.547393633              | 0.049572143 | 1   | Not Annotated                                                                             | Not Annotated                                                                                                                                                                                                                                                                         |
| GRMZM2G109354    | -0.23238028        | 4.299193318              | 0.049637099 | 1   | Transcpt_factor_SBP-box                                                                   | molecular_function DNA binding cellular_component intracellular cell nucleus organelle                                                                                                                                                                                                |
| GRMZM2G065498    | -3.410580217       | 6.093521688              | 0.049649496 | 1   | Plcyanin-like Cupredoxin                                                                  | molecular_function copper ion binding electron carrier activity ion binding                                                                                                                                                                                                           |
| GRMZM2G406588    | -0.738428715       | 2.124157676              | 0.049760731 | 1   | Not Annotated                                                                             | Not Annotated                                                                                                                                                                                                                                                                         |
| GRMZM2G336745    | 1.772926957        | -0.132041302             | 0.049798285 | 1   | NIF_FeS_clus_asmb NifU_N DUF1084                                                          | molecular_function iron ion binding biological_process iron-sulfur cluster assembly cellular component assembly ion binding iron-sulfur cluster binding                                                                                                                               |
| GRMZM2G156648    | -0.600010587       | 3.178643898              | 0.04983792  | 1   | OTU                                                                                       | cellular_component cell plasma membrane                                                                                                                                                                                                                                               |
| GRMZM2G052750    | -0.598197969       | 2.585034449              | 0.049858712 | 1   | Ribosome_control_1 Quino_amine_DH_bsu                                                     | Golgi apparatus                                                                                                                                                                                                                                                                       |
| GRMZM2G035213    | 0.895495728        | 1.816169497              | 0.04990849  | 1   | Methyltransf_11 Tocopherol_O-MeTrfase                                                     | molecular_function biological_process metabolic process methyltransferase activity biosynthetic process vitamin E biosynthetic process transferase activity methylation small molecule metabolic process tocopherol O-methyltransferase activity                                      |
| GRMZM2G397836    | -0.719662455       | 3.870243571              | 0.049936534 | 1   | Cl-channel_volt-gated CBS_dom Cl-channel_core                                             | molecular_function ion channel activity voltage-gated chloride channel activity protein binding cellular_component transport chloride transport biological_process membrane transmembrane transporter activity transmembrane transport trans-Golgi network unidimensional cell growth |
| GRMZM2G177227    | -0.756979623       | 0.743969858              | 0.049946541 | 1   | Exo70 Cullin_repeat-like_dom                                                              | exocyst cellular_component intracellular cell cytoplasm transport exocytosis biological_process vesicle-mediated transport protein complex                                                                                                                                            |
